# Supplementary material
Source: MDPI journal article supplement (https://www.mdpi.com/1424-2818/12/8/297)
Supplement: s1 [file s1]

## Sheet: Data
X1	X2	X2.1	X3	X3.1	X4	X4.1	X5	X5.1	X6	X6.1	X7	X7.1	X8	X8.1	X9	X9.1	X10	X10.1	X11	X11.1	X12	X12.1	X13	X13.1	X14	X14.1	X15	X15.1	X16	X16.1	X17	X17.1	X18	X18.1	X19	X19.1	X20	X20.1	X21	X21.1	X22	X22.1	X23	X23.1	X24	X24.1	X25	X25.1	X26
UpperBarton_20150409_SA53102	36.1763	63.8212	35.3145	64.3727	30.0406	64.7174	29.5236	64.2866	29.1444	63.6833	36.3831	61.4255	35.6937	60.8051	30.4715	59.7365	29.92	60.0295	29.4891	60.5466	38.1755	63.735	37.7447	64.1142	37.2104	64.3555	36.6588	64.5795	36.1073	64.7519	35.5386	64.8725	34.9526	64.9587	34.3838	65.0621	33.7978	65.1311	33.2118	65.1828	32.6259	65.1655	32.0399	65.1483	31.4539	65.1483	30.8851	65.0449	30.3336
Eliza_20141013_SA50424	9.32597	31.2949	9.75862	30.9103	14.4857	28.2022	15.2548	28.3304	15.7356	28.699	10.0631	33.6504	10.688	33.8747	16.1522	33.2658	16.7451	32.6249	16.8252	32.048	7.51526	32.048	7.80369	31.5673	8.14019	31.1346	8.55682	30.7821	9.02151	30.4616	9.48621	30.1732	9.99898	29.9489	10.4957	29.6925	10.9925	29.4521	11.4892	29.2118	12.002	28.9714	12.5147	28.7471	13.0275	28.5227	13.5403	28.3465	14.1011
Eliza_20141015_SA50612	52.4452	8.08778	51.8339	8.76177	47.2571	10.4546	46.7085	10.2821	46.1913	9.95299	52.022	6.00314	51.1913	5.59562	46.2383	5.81505	45.9405	6.19123	45.5957	6.64578	53.9813	7.69593	53.7461	8.16615	53.3856	8.558	52.9781	8.87148	52.5236	9.13794	52.0377	9.35738	51.5518	9.56114	51.0816	9.78058	50.6113	10.0314	50.1255	10.2194	49.6239	10.3762	49.1066	10.4859	48.6051	10.6113	48.0722	10.6113	47.5549
Eliza_20141014_SA50535	9.4964	38.9337	9.82822	38.112	13.6047	34.3672	14.3631	34.3514	14.9003	34.6042	10.8869	41.0668	11.7243	40.8614	16.5752	38.8231	16.6859	38.2384	16.7333	37.559	8.12171	40.0555	8.20072	39.5025	8.40613	38.9811	8.65895	38.4754	8.94337	38.0014	9.30679	37.559	9.68601	37.1482	10.0494	36.7215	10.4445	36.3265	10.8711	35.9473	11.2977	35.5839	11.7559	35.252	12.1984	34.936	12.6724	34.6516	13.2254
Eliza_20161103_SA55466	37.1539	9.87267	36.6285	10.7784	33.2048	14.4014	32.4077	14.4014	32.0092	14.2565	35.5779	7.80757	34.5996	7.98872	30.1434	10.3618	29.8173	11.1045	29.7992	11.6842	38.6212	8.5684	38.5487	9.12996	38.3857	9.69153	38.1502	10.2169	37.8241	10.6878	37.4799	11.1407	37.1176	11.5755	36.701	11.9921	36.3025	12.4088	35.9039	12.8073	35.4692	13.1877	35.0525	13.5681	34.5815	13.9123	34.0743	14.1478	33.4946
Eliza_20150211_SA51767	43.9353	34.2586	43.1201	34.613	38.4235	34.4358	38.0513	33.9218	38.0158	33.4433	44.3961	32.1318	43.8999	31.4406	39.3273	29.686	38.902	29.9519	38.707	30.3772	45.4595	34.5598	45.0341	34.8434	44.5733	35.0561	44.0948	35.1979	43.5809	35.2865	43.0846	35.2865	42.5706	35.2333	42.0744	35.1979	41.5604	35.1447	41.0642	35.1093	40.5502	35.1093	40.054	35.0384	39.54	34.9498	39.0615	34.7902	38.6361
Eliza_20150210_SA51565	43.8198	15.8635	43.4045	16.7605	39.7335	20.1824	39.1023	20.1658	38.5541	19.9166	42.5408	14.0031	41.5441	14.0031	36.9429	16.0794	36.7269	16.611	36.6937	17.2256	45.2816	14.8004	45.1321	15.332	44.9494	15.8469	44.667	16.3286	44.3514	16.7771	43.9859	17.1924	43.5873	17.5578	43.172	17.9399	42.7899	18.3385	42.3913	18.7206	41.976	19.0694	41.5109	19.4016	41.0458	19.7006	40.5475	19.9166	40.0159
Eliza_20150211_SA51692	69.3824	8.32178	68.8858	9.26354	64.6907	12.4827	63.8859	12.5854	63.2524	12.3286	68.3721	6.2499	67.3619	6.13003	62.1565	7.75672	61.6257	8.45876	61.5572	9.21217	71.0947	7.72247	70.8379	8.21904	70.5296	8.68136	70.1701	9.10944	69.7762	9.50327	69.3482	9.86285	68.9372	10.2224	68.492	10.5478	68.0297	10.856	67.5674	11.1813	67.105	11.4724	66.6085	11.7464	66.1119	12.0032	65.6153	12.2429	65.0674
Eliza_20150818_SA53223	56.2394	29.8378	55.6083	30.4163	50.6821	31.6084	50.0861	31.3104	49.8056	30.9247	56.0466	27.3834	55.2928	26.9802	50.2088	26.6647	49.6303	27.1029	49.4725	27.6113	57.8874	29.5748	57.5192	29.9605	57.116	30.3111	56.6777	30.5916	56.2044	30.8546	55.696	31.0299	55.1876	31.1701	54.6617	31.2928	54.1533	31.4156	53.6273	31.5207	53.1014	31.6084	52.5755	31.6785	52.0495	31.7486	51.5236	31.7311	50.9977
Eliza_20150820_SA53424	45.9603	61.12	44.9423	61.083	40.9441	58.3435	40.796	57.8623	40.7405	57.381	47.3856	59.7318	47.108	58.6582	44.1649	54.9562	43.6096	54.8451	43.0172	54.8266	47.0524	62.3047	46.5526	62.2676	46.0529	62.1381	45.5716	61.9715	45.1089	61.7679	44.6461	61.5087	44.2019	61.2681	43.7762	61.009	43.3504	60.7128	42.9247	60.4166	42.5175	60.1205	42.1473	59.7873	41.7771	59.4171	41.4624	59.0284	41.2033
Eliza_20171114_SA56802	68.6067	24.5414	67.9729	25.0871	63.29	26.3723	62.6914	26.1082	62.1633	25.6857	68.3602	22.3584	67.568	21.9006	62.6914	21.707	62.2865	22.0943	61.952	22.3936	70.508	24.3125	70.1735	24.735	69.7686	25.0695	69.2933	25.3336	68.8179	25.5449	68.325	25.7561	67.8321	25.9498	67.3039	26.073	66.7934	26.1786	66.2652	26.2667	65.7371	26.3371	65.2089	26.4075	64.6808	26.4955	64.1526	26.4779	63.6245
Eliza_20160524_SA54363	47.735	10.2593	47.5224	10.9681	43.447	14.8308	42.7028	14.8485	41.8877	14.6359	46.1226	7.93811	45.2189	8.04443	40.3284	10.0821	39.9032	10.72	39.85	11.411	49.2057	9.01897	49.1348	9.6037	48.9399	10.153	48.6741	10.6668	48.3197	11.1453	47.9653	11.5882	47.5578	12.0135	47.1503	12.4387	46.725	12.8463	46.3175	13.2538	45.8568	13.6082	45.3784	13.9449	44.8822	14.2638	44.3684	14.5296	43.8014
Eliza_20151117_SA53572	28.2613	19.5669	27.6721	20.3346	23.0304	22.6733	22.4412	22.4591	22.0306	22.1913	27.4936	17.1746	26.5831	16.9425	21.4057	17.8351	21.0308	18.2993	20.7987	18.942	30.0645	18.8349	29.8145	19.3527	29.4932	19.8168	29.1004	20.2096	28.6541	20.5845	28.1899	20.9059	27.7079	21.2094	27.2258	21.495	26.7259	21.7628	26.2082	22.0127	25.6905	22.2448	25.1549	22.4234	24.6193	22.6019	24.0658	22.7269	23.4945
Eliza_20170208_SA55769	64.5352	24.8746	63.9836	25.6753	58.9126	27.9172	58.2899	27.5969	57.8806	27.2055	63.8769	22.3302	62.8805	21.9566	57.3824	22.5259	56.991	23.0775	56.813	23.6825	66.4746	24.3408	66.2078	24.8746	65.7807	25.3016	65.3537	25.6931	64.8733	26.049	64.3751	26.3692	63.8235	26.5827	63.2897	26.8496	62.7381	27.0632	62.1865	27.2945	61.6172	27.4902	61.0478	27.6681	60.4784	27.846	59.8912	27.9172	59.3041
Eliza_20160524_SA54433	68.3879	28.3334	67.8625	29.1849	63.0437	31.3226	62.4096	31.2139	61.8661	30.8334	67.8082	25.8696	66.8662	25.3986	61.685	26.0146	61.1777	26.5218	60.9603	27.0653	70.1089	27.8624	69.7466	28.2791	69.3843	28.7139	68.9676	29.0762	68.5328	29.4023	68.0618	29.6921	67.5546	29.9276	67.0654	30.1631	66.5401	30.3624	66.0328	30.5798	65.5075	30.761	64.9821	30.924	64.4748	31.1233	63.9314	31.2139	63.3698
Eliza_20150211_SA51729	60.6096	22.593	59.8469	23.0337	55.2029	22.9998	54.8131	22.5591	54.6775	22.1015	60.8978	20.7286	60.2537	20.1354	55.7622	18.6778	55.3215	18.9659	54.9826	19.3049	62.2876	22.9489	61.8469	23.2032	61.4062	23.4405	60.9147	23.5761	60.4232	23.6439	59.9147	23.6778	59.4062	23.7117	58.9147	23.7286	58.4063	23.7455	57.8978	23.7286	57.4063	23.6778	56.8978	23.61	56.4063	23.5252	55.9148	23.4066	55.4741
Eliza_20150211_SA51731	60.7295	26.8051	59.678	27.305	54.4893	26.7879	53.9377	26.2535	53.7481	25.7363	61.2983	24.1849	60.7122	23.2885	55.6615	21.513	54.9892	21.7199	54.6789	22.0302	62.4533	27.0292	61.9361	27.2533	61.4018	27.4601	60.8674	27.6498	60.3158	27.7187	59.7469	27.7532	59.1781	27.7704	58.6092	27.7704	58.0576	27.7532	57.4887	27.7187	56.9199	27.667	56.3683	27.5636	55.8166	27.4429	55.2995	27.2188	54.7996
Eliza_20151117_SA53462	72.7934	22.8994	71.909	23.4762	65.8525	23.2262	65.4103	22.7263	65.218	22.361	73.1972	20.3229	72.6396	19.4577	66.8715	17.5543	66.2178	17.8427	65.7371	18.1887	74.7738	23.2454	74.2547	23.5915	73.6586	23.8415	73.0818	24.053	72.4473	24.1683	71.8321	24.2645	71.1976	24.3029	70.5631	24.3414	69.9286	24.3606	69.3133	24.3029	68.6788	24.226	68.0636	24.1299	67.4483	23.9568	66.8523	23.7453	66.3139
Eliza_20160524_SA54420	43.5173	32.0547	43.0543	32.888	38.4804	34.8509	37.7397	34.7027	37.3323	34.2213	43.0358	29.9621	42.1099	29.5918	37.2397	29.9621	36.6471	30.4806	36.5175	31.0362	45.1098	31.6843	44.8321	32.1287	44.4802	32.4991	44.0914	32.8509	43.684	33.1843	43.2395	33.4435	42.7766	33.6842	42.3136	33.925	41.8507	34.1472	41.3692	34.3509	40.8877	34.5361	40.3878	34.6842	39.8878	34.8138	39.3693	34.8879	38.8508
Eliza_20160301_SA54126	65.2042	21.8215	64.5445	22.4986	59.4059	23.9394	58.833	23.5575	58.4511	23.1409	64.9611	19.5474	63.9542	18.9918	58.6594	19.0092	58.2081	19.5474	57.9824	20.0508	66.9749	21.5611	66.6103	21.9951	66.159	22.325	65.6902	22.6374	65.1868	22.8978	64.6834	23.1409	64.1626	23.3666	63.6244	23.5228	63.0862	23.6617	62.5307	23.8006	61.9926	23.9221	61.4197	24.0089	60.8642	24.0957	60.3086	24.1478	59.7705
Eliza_20160705_SA54616	46.1502	28.3701	45.3699	28.8532	40.3722	28.7231	39.7591	28.2958	39.5918	27.757	46.4847	25.9549	45.7601	25.4532	41.0967	24.0226	40.4465	24.227	40.0563	24.6915	47.8967	28.6674	47.4879	29.0204	46.9863	29.2619	46.4847	29.4291	45.9459	29.522	45.4071	29.6149	44.8683	29.6521	44.3109	29.6707	43.7721	29.6521	43.2333	29.6335	42.6945	29.5406	42.1558	29.4663	41.617	29.3548	41.0967	29.2062	40.6694
Eliza_20170911_SA56434	66.9534	33.4158	65.9966	33.6941	60.4998	33.5202	59.7692	32.9635	59.5431	32.4417	67.51	30.6674	66.762	29.9194	61.4217	28.2495	60.5868	28.4408	60.1867	28.9453	69.0929	33.6071	68.5885	33.955	68.0318	34.2334	67.4404	34.4073	66.8316	34.4769	66.2228	34.5117	65.5965	34.4943	64.9877	34.4943	64.3789	34.4769	63.7527	34.4247	63.1612	34.3203	62.5524	34.2334	61.9436	34.129	61.3522	33.9203	60.8303
Eliza_20160823_SA54947	62.3402	18.7074	61.9997	19.2629	57.8425	21.8612	57.2154	21.7716	56.6778	21.449	61.5338	16.6468	60.7812	16.4496	56.0686	17.3277	55.6743	17.9369	55.5489	18.4924	63.7737	17.9369	63.6662	18.4387	63.3974	18.8687	63.0749	19.2808	62.6807	19.6034	62.2864	19.9438	61.8385	20.1768	61.4084	20.4456	60.9784	20.7323	60.5304	20.9831	60.0645	21.2161	59.5986	21.4311	59.1327	21.6282	58.6489	21.7895	58.1292
Eliza_20150819_SA53328	68.6683	27.9779	67.8173	28.4744	62.6046	28.5808	62.0727	28.2439	61.6472	27.8361	68.9874	25.4426	68.2782	24.8752	63.1188	23.4213	62.4096	23.5632	62.0727	24.0064	70.264	28.1907	69.8207	28.5098	69.342	28.7935	68.8279	28.9531	68.296	29.0595	67.7463	29.1127	67.1967	29.1836	66.6648	29.219	66.1152	29.2013	65.5655	29.219	65.0159	29.2013	64.4663	29.1658	63.9166	29.1481	63.4025	28.9886	62.9415
Eliza_20160524_SA54399	55.4607	15.3919	54.6215	16.1597	49.0504	17.4275	48.2469	17.0525	47.9255	16.4811	55.3715	12.6599	54.193	12.2492	48.6755	11.4636	47.9791	11.9457	47.6398	12.5349	57.6213	15.1597	57.1928	15.624	56.7285	16.0347	56.2107	16.4275	55.6572	16.6954	55.05	16.8561	54.4251	16.9632	53.8001	17.106	53.193	17.2668	52.5681	17.3917	51.9431	17.481	51.3181	17.5346	50.6932	17.5882	50.0504	17.5882	49.4433
Eliza_20160826_SA54980	65.993	37.2592	65.1334	37.6276	60.7655	38.1363	60.2041	37.803	59.941	37.4522	66.0281	35.1542	65.3264	34.5928	60.783	33.7157	60.1515	34.1192	59.9235	34.5402	67.7823	36.9961	67.4665	37.4171	67.0455	37.6978	66.5719	37.9258	66.0983	38.1188	65.5895	38.2591	65.0808	38.3293	64.5546	38.3819	64.0458	38.417	63.5371	38.5047	63.0109	38.5398	62.5021	38.5749	61.9759	38.6099	61.4672	38.5573	61.0286
Eliza_20160301_SA54080	41.1484	54.7019	40.1206	54.6671	35.6782	52.3327	35.3821	51.6184	35.4517	51.0435	42.5247	52.7159	42.2111	51.6707	38.7269	48.291	38.0126	48.2039	37.3855	48.4478	42.5769	55.5207	42.0369	55.6253	41.4968	55.6078	40.9568	55.5381	40.4341	55.4162	39.9464	55.1897	39.4586	54.9458	38.9708	54.6845	38.483	54.4406	38.0126	54.1793	37.5423	53.918	37.0893	53.6218	36.6189	53.3431	36.1834	53.0121	35.9221
Eliza_20160829_SA55085	67.4648	16.9791	67.0655	17.8645	62.8989	21.2672	62.326	21.2325	61.7357	21.0763	66.2149	14.8437	65.2947	14.8437	60.1559	16.8402	59.8954	17.3957	59.9996	17.8645	69.0968	15.92	68.9753	16.493	68.7148	17.0138	68.4544	17.5346	68.0898	17.986	67.6905	18.4374	67.2565	18.8193	66.8398	19.236	66.3885	19.6006	65.9197	19.9304	65.451	20.2776	64.9475	20.5901	64.4267	20.8506	63.8885	21.0936	63.3156
Eliza_20170210_SA55855	56.4186	12.7299	56.1508	13.694	53.2049	17.3719	52.4729	17.5505	51.8659	17.3898	54.7582	10.9266	53.812	11.0695	49.7412	13.5333	49.5627	14.1761	49.5627	14.801	57.6684	11.4087	57.6327	11.9443	57.5077	12.4621	57.347	12.962	57.0792	13.4262	56.7757	13.8726	56.4543	14.2832	56.1508	14.7295	55.8473	15.158	55.5438	15.5865	55.151	15.9615	54.7761	16.3364	54.3833	16.6935	53.9726	17.0327	53.4727
Eliza_20160524_SA54418	65.9851	18.6558	65.6446	19.6952	61.8991	22.8493	61.2719	22.8314	60.9135	22.5088	64.7127	16.7203	63.8167	16.8457	59.2647	18.5303	59.1572	19.0679	59.1572	19.5339	67.3471	17.7418	67.2754	18.2794	67.1141	18.7991	66.8453	19.2651	66.5048	19.6952	66.1823	20.1432	65.7701	20.4837	65.3758	20.8421	64.9636	21.2185	64.5514	21.559	64.1034	21.8636	63.6554	22.1683	63.2074	22.4729	62.6877	22.6701	62.1679
Eliza_20160307_SA54334	52.9506	32.7022	52.0189	32.5947	47.5212	30.3906	47.0732	29.6739	47.2166	29.208	54.4021	30.6415	54.0616	29.6559	50.3345	26.323	49.546	26.0901	48.883	26.323	54.4738	33.6698	53.9362	33.7236	53.3986	33.7056	52.861	33.616	52.3593	33.4369	51.8576	33.2397	51.3738	32.9889	50.89	32.7559	50.4061	32.523	49.9044	32.308	49.4385	32.0392	48.9905	31.7345	48.5426	31.4299	48.1484	31.0715	47.79
Eliza_20160307_SA54283	72.0847	19.963	71.4419	20.6951	66.4422	22.1057	65.9065	21.8736	65.5494	21.6058	71.674	17.4096	70.7455	17.1775	65.6922	17.6417	65.228	18.0881	64.9601	18.6238	73.8703	19.6595	73.5132	20.1059	73.1025	20.463	72.6204	20.7844	72.1382	21.0701	71.6383	21.3201	71.1204	21.5522	70.6026	21.7308	70.0491	21.8736	69.5134	22.0164	68.9599	22.1593	68.4063	22.2664	67.8528	22.32	67.2814	22.2664	66.7457
Eliza_20151117_SA53459	65.7458	10.8207	65.0316	11.3028	60.1747	12.0885	59.514	11.7314	59.2641	11.1421	65.7458	8.24947	64.8887	7.85664	60.0676	7.03526	59.4605	7.49952	59.1926	8.07091	67.7635	10.5529	67.3885	10.9457	66.96	11.3028	66.4779	11.5707	65.9779	11.8028	65.4422	11.9278	64.9066	12.0528	64.3709	12.1778	63.8173	12.2314	63.2817	12.3206	62.7281	12.3564	62.1924	12.4099	61.6389	12.4456	61.0854	12.4635	60.5676
Eliza_20160524_SA54428	47.2828	30.1088	47.1559	30.924	43.8951	34.9458	43.2248	35.1813	42.6088	35.1088	45.5074	28.1885	44.7103	28.3515	40.5074	31.1233	40.2719	31.8842	40.1632	32.3371	48.4241	28.7501	48.4422	29.2936	48.3154	29.8189	48.1523	30.3443	47.8806	30.8153	47.5907	31.2863	47.3009	31.7573	46.9748	32.1921	46.6487	32.6269	46.3045	33.0436	45.9422	33.4603	45.5617	33.8588	45.1813	34.2392	44.7465	34.5834	44.2574
Eliza_20160524_SA54374	51.3722	32.5279	50.5727	32.9095	45.8116	32.0736	45.3755	31.6556	45.0666	31.0923	52.0628	30.4744	51.554	29.693	47.4107	27.2398	46.7384	27.2943	46.1387	27.6941	53.0441	33.073	52.5898	33.3093	52.0991	33.4728	51.5903	33.5637	51.0633	33.5637	50.5545	33.5092	50.0275	33.4365	49.5187	33.382	49.0099	33.2729	48.5011	33.1821	47.9923	33.1276	47.4834	33.0185	46.9746	32.8913	46.5203	32.6551	46.1205
Eliza_20151117_SA53541	34.3684	18.6039	33.6678	19.3415	28.4314	21.1484	27.6386	20.8903	27.1592	20.4477	33.7415	15.6907	32.7643	15.3773	27.196	15.6539	26.6982	16.1701	26.4954	16.7417	36.3966	17.9955	36.0647	18.5118	35.6222	18.9543	35.1613	19.3783	34.645	19.7102	34.0919	19.9868	33.5018	20.1712	32.9671	20.5031	32.3956	20.7428	31.8056	20.9271	31.2155	21.0931	30.6071	21.1853	29.9802	21.2775	29.3717	21.2959	28.7633
Eliza_20151118_SA53635	58.3564	23.67	57.3597	23.848	52.6079	23.1183	52.0206	22.442	51.8783	21.8903	59.0326	21.6412	58.3564	20.8403	54.1385	18.5089	53.3732	18.5979	52.8749	19.0428	60.0827	24.1861	59.62	24.4531	59.1038	24.5777	58.5877	24.6666	58.0538	24.6666	57.5377	24.6133	57.0038	24.5243	56.4877	24.4175	55.9716	24.2929	55.4732	24.1505	54.9571	24.026	54.441	23.9014	53.9249	23.759	53.4266	23.581	52.9817
Eliza_20161028_SA55237	65.4816	14.3927	65.2138	15.3034	61.5709	19.1606	60.9995	19.2141	60.2674	19.1427	64.1066	12.4642	63.1602	12.4106	58.3924	15.1427	58.1602	15.8034	58.1245	16.3927	66.7316	13.0892	66.7852	13.6606	66.6602	14.232	66.4995	14.7856	66.2316	15.2856	65.8923	15.7499	65.5352	16.1963	65.1602	16.6427	64.7852	17.0713	64.3566	17.4641	63.9281	17.8391	63.4816	18.1963	63.0174	18.5534	62.5352	18.857	61.9816
Eliza_20160826_SA55014	46.3185	15.499	45.8542	16.1954	40.9081	18.106	40.2296	17.7667	39.7653	17.4096	45.9613	13.1063	45.0507	12.6063	39.8724	12.6599	39.3903	13.1599	39.1046	13.7313	48.1576	15.0883	47.8184	15.5347	47.4434	15.9454	47.0327	16.3204	46.5684	16.6239	46.0685	16.8739	45.5685	17.1239	45.0328	17.3203	44.515	17.5167	43.9793	17.6953	43.4436	17.856	42.908	17.9988	42.3544	18.1238	41.8009	18.1596	41.2474
Eliza_20160301_SA54095	50.2374	12.3266	49.3409	12.7231	44.8068	12.7059	44.2551	12.2232	44.0137	11.7232	50.5477	10.1544	49.7719	9.44752	45.3412	8.189	44.755	8.43036	44.3758	8.91308	51.8062	12.4128	51.4097	12.7231	50.9787	12.9645	50.496	13.1369	50.0132	13.2576	49.5133	13.292	49.0133	13.2576	48.5134	13.2403	48.0134	13.2058	47.4962	13.2403	46.9962	13.2058	46.5135	13.1369	46.0136	13.0852	45.5136	12.9817	45.0654
Eliza_20151118_SA53628	62.0404	38.0394	61.2615	38.5828	56.0628	38.9451	55.6643	38.6734	55.3745	38.2387	62.1129	35.8838	61.4246	35.123	56.2802	34.1811	55.7911	34.4891	55.61	34.96	63.6526	38.0575	63.2541	38.4198	62.765	38.6915	62.2759	38.8908	61.7506	39.0357	61.2072	39.1444	60.6638	39.2168	60.1385	39.2712	59.5769	39.2712	59.0516	39.3074	58.4901	39.3255	57.9467	39.3255	57.4033	39.3074	56.878	39.1987	56.3527
Eliza_20160304_SA54213	53.9787	8.99942	53.5859	9.89222	49.3897	13.017	48.8004	13.0884	48.1933	12.892	52.6573	6.5353	51.5324	6.49958	46.8541	8.67802	46.5863	9.26726	46.6756	9.85651	55.6036	7.80307	55.425	8.35661	55.175	8.87443	54.8893	9.3744	54.5144	9.8208	54.1394	10.2493	53.7108	10.6422	53.2466	10.9993	52.7823	11.3386	52.3359	11.6957	51.8538	12.0349	51.3717	12.3385	50.8717	12.6242	50.3361	12.8563	49.7647
Eliza_20161028_SA55219	40.3747	56.3031	39.6068	57.0353	34.214	58.446	33.5533	58.0531	33.1426	57.5888	40.0711	53.7674	38.9818	53.3031	33.7319	52.8746	33.2497	53.4281	32.8747	53.9103	42.4104	55.8567	42.1247	56.3924	41.6961	56.8567	41.2318	57.2495	40.6782	57.5174	40.1425	57.821	39.5533	58.0174	38.964	58.2138	38.3568	58.2852	37.7676	58.4817	37.1783	58.6602	36.5711	58.7674	35.964	58.8388	35.339	58.821	34.7497
Eliza_20160705_SA54607	42.9602	57.6576	41.7904	57.7708	37.3567	56.0727	37.0359	55.6765	37.0171	55.186	44.1299	55.5633	43.6582	54.6011	39.4698	51.9597	38.8283	52.0541	38.2811	52.2993	44.3752	58.2236	43.8846	58.3934	43.3564	58.45	42.8281	58.4688	42.2998	58.45	41.7904	58.3368	41.2999	58.1858	40.7905	58.016	40.2999	57.8462	39.7905	57.6764	39.3188	57.4689	38.8283	57.2613	38.3377	57.0349	37.8849	56.7897	37.5831
Eliza_20170208_SA55797	69.9193	32.8287	69.0455	33.5242	64.106	33.221	63.6781	32.8465	63.4463	32.4007	70.3472	30.6354	69.5626	29.9043	64.855	28.6204	64.427	28.8165	64.0882	29.2088	71.4172	33.007	71.0249	33.3458	70.5434	33.5598	70.0619	33.756	69.5626	33.8986	69.0455	34.0056	68.5284	34.0413	68.0112	34.0591	67.4763	34.0591	66.9592	34.0413	66.442	33.9878	65.9249	33.9343	65.4078	33.8273	64.9263	33.649	64.4627
Eliza_20160304_SA54247	51.679	22.9606	51.4671	23.826	48.1466	27.4644	47.5991	27.5527	47.0692	27.4291	50.1424	21.1061	49.1533	21.3357	45.25	23.985	45.1617	24.6032	45.2324	25.186	52.8094	21.7066	52.827	22.2365	52.6681	22.7487	52.4385	23.2432	52.1559	23.6847	51.8556	24.1263	51.5201	24.5502	51.1845	24.9741	50.8312	25.3626	50.4603	25.7512	50.0894	26.1398	49.7009	26.5107	49.3123	26.8639	48.8708	27.1642	48.3762
Eliza_20161028_SA55298	69.2238	20.7654	68.7239	21.5867	64.1352	24.9434	63.5459	24.8542	63.0996	24.4971	68.0097	18.4978	67.1169	18.4264	61.7783	19.9797	61.3676	20.6404	61.2069	21.176	71.045	19.9083	70.8665	20.4975	70.5272	20.9975	70.1523	21.4796	69.7238	21.9081	69.2595	22.3188	68.7596	22.658	68.2954	23.0508	67.7776	23.39	67.2776	23.7293	66.7598	24.0328	66.2063	24.3007	65.6707	24.5863	65.0993	24.8006	64.4923
Eliza_20160304_SA54195	47.3135	22.9813	46.6995	23.7357	41.9804	25.104	41.2962	24.7532	41.1383	24.3497	46.9275	20.9463	46.0153	20.6306	41.3138	20.6832	40.8752	21.1042	40.7524	21.5077	48.8046	22.8585	48.5766	23.3322	48.2257	23.7181	47.8047	24.0164	47.3486	24.2795	46.8574	24.4549	46.3311	24.5602	45.8399	24.7181	45.3311	24.8584	44.8224	24.9988	44.3136	25.104	43.8049	25.2093	43.2786	25.2795	42.7523	25.297	42.2611
Eliza_20160823_DSC4860	25.5251	66.4003	24.4549	66.7336	19.3675	64.8038	18.8412	63.9969	18.7008	63.3127	26.911	64.1372	26.3496	63.1548	22.455	59.6637	21.6305	59.5585	20.7709	59.8041	27.1039	67.1721	26.5601	67.3476	25.9812	67.4002	25.4023	67.3651	24.8409	67.2774	24.2795	67.1546	23.7181	66.9967	23.1568	66.8388	22.5954	66.6634	22.0691	66.4529	21.5253	66.2248	20.999	65.9968	20.4727	65.7336	20.0166	65.3828	19.5955
Eliza_20160705_SA54572	58.602	34.4728	57.7869	34.8714	53.3487	36.0851	52.5335	35.8315	52.2255	35.288	58.4933	32.2447	57.7144	31.9367	52.9501	31.2121	52.3705	31.4839	52.0444	32.0635	60.486	34.3642	60.1599	34.7627	59.7614	35.0888	59.3085	35.3242	58.8194	35.4873	58.3122	35.6322	57.805	35.6684	57.3159	35.8134	56.8086	35.8677	56.2833	35.9402	55.7761	35.9945	55.2689	36.067	54.7616	36.1213	54.2363	36.1394	53.7291
Eliza_20160711_SA54708	46.3129	30.5621	45.5208	30.3779	42.0574	28.333	41.91	27.8909	41.8916	27.4119	47.584	29.0699	47.2524	28.333	44.397	25.3671	43.7154	25.3302	43.2364	25.5513	47.4551	31.4095	47.0129	31.4464	46.5708	31.4095	46.1471	31.2806	45.7234	31.1332	45.3365	30.9121	44.9497	30.6911	44.5628	30.47	44.1944	30.2305	43.8259	29.991	43.4391	29.7515	43.0706	29.512	42.7022	29.2726	42.4074	28.9225	42.2416
Eliza_20170208_SA55753	46.6448	57.6706	46.1257	58.1896	41.7763	59.5142	41.2572	59.2815	41.0603	58.9056	46.3584	55.5764	45.6603	55.0215	41.0961	54.9678	40.7023	55.3616	40.4696	55.8807	48.0767	57.4916	47.7903	57.8675	47.4502	58.1896	47.0744	58.476	46.6627	58.6908	46.2152	58.8519	45.7677	59.013	45.3203	59.1383	44.8549	59.2636	44.4074	59.4068	43.9778	59.5679	43.5125	59.6395	43.0471	59.7111	42.5638	59.7111	42.1163
Eliza_20161031_SA55367	69.3923	27.4105	68.8387	28.0533	63.8566	30.1248	63.1066	29.839	62.6424	29.4641	68.8923	24.9641	68.1245	24.7141	62.5888	24.8034	61.9816	25.3927	61.7138	25.9998	71.428	26.9641	71.1066	27.4462	70.6601	27.8212	70.1959	28.1783	69.7137	28.4998	69.2137	28.7855	68.678	29.0176	68.1423	29.2498	67.5887	29.3926	67.0352	29.5712	66.4816	29.7676	65.928	29.9283	65.3566	30.089	64.7852	30.1783	64.2138
Eliza_20170210_SA55833	52.6139	17.6329	52.1691	18.4158	48.3792	21.2982	47.8276	21.316	47.2048	21.1203	51.5107	15.6223	50.6567	15.4977	46.333	16.9567	45.9237	17.5973	45.7458	18.309	54.0729	16.7254	53.9484	17.2236	53.6637	17.6684	53.379	18.0955	53.0587	18.5225	52.6851	18.8784	52.2936	19.1986	51.8844	19.5367	51.4751	19.8392	51.0481	20.1417	50.5855	20.4086	50.1407	20.6755	49.6958	20.9246	49.2154	21.1203	48.6994
Eliza_20170215_SA56068	46.0946	24.8711	45.451	25.5148	40.9452	26.9273	40.2836	26.6412	39.9082	26.2657	45.7549	22.5467	45.0397	22.2427	40.1585	22.1354	39.6042	22.6003	39.3718	23.1546	47.9184	24.6386	47.5966	25.0499	47.1853	25.3896	46.7562	25.6757	46.2913	25.9081	45.7907	26.0869	45.29	26.23	44.7894	26.373	44.3066	26.5697	43.806	26.7306	43.2875	26.8379	42.7868	26.9452	42.2683	27.0524	41.7498	27.0882	41.2313
Eliza_20170906_SA56289	40.8871	11.0798	40.1902	11.6721	35.5214	13.6929	34.7201	13.4142	34.3891	13.0135	40.3645	8.74534	39.5282	8.60597	34.4065	8.81503	33.849	9.35508	33.7619	9.87771	42.995	10.3307	42.7163	10.8533	42.3156	11.2888	41.8975	11.6895	41.3749	11.9856	40.8697	12.2818	40.347	12.5431	39.8244	12.8044	39.2669	13.0309	38.7269	13.2574	38.152	13.4142	37.5945	13.5535	37.0022	13.6755	36.4273	13.7452	35.835
Eliza_20171114_SA56798	29.7924	54.8609	29.0683	54.7919	25.4477	52.6713	25.2925	52.154	25.2753	51.7575	30.9821	53.3092	30.7579	52.654	27.758	49.5851	27.1891	49.5679	26.8787	49.7575	31.051	55.7229	30.6028	55.7746	30.1373	55.7402	29.689	55.6539	29.258	55.516	28.827	55.3436	28.4132	55.154	28.0166	54.9298	27.6201	54.7057	27.2235	54.4988	26.827	54.2574	26.4477	53.9988	26.1029	53.7057	25.7753	53.3781	25.5856
OldMill_20160811_SA11994	52.2824	44.5486	51.6291	44.4427	47.6033	42.9418	47.2854	42.4651	47.2501	41.9707	53.4301	43.0125	53.0593	42.5004	49.6162	39.8872	48.8393	39.7989	48.3096	40.0637	53.8185	45.2549	53.3771	45.3432	52.918	45.3608	52.4766	45.2902	52.0352	45.1843	51.5938	45.0783	51.1876	44.8841	50.7815	44.7075	50.3401	44.5839	49.934	44.372	49.5279	44.1602	49.1218	43.9659	48.698	43.807	48.3096	43.5775	47.9741
OldMill_20161108_SA55530	61.4211	28.9719	60.6697	29.0593	56.5284	27.871	56.2139	27.4517	56.1789	27.0847	62.2424	27.1546	61.7531	26.6304	57.8215	24.6383	57.2448	24.6733	56.9652	24.9529	62.7142	29.7058	62.2773	29.8456	61.823	29.9155	61.3687	29.898	60.9318	29.8106	60.495	29.6883	60.0407	29.5835	59.6213	29.4262	59.167	29.3388	58.7301	29.234	58.3107	29.0418	57.9263	28.8146	57.5069	28.6399	57.105	28.3953	56.8254
OldMill_20170216_SA56074	52.9534	29.4123	52.4421	29.3744	48.3323	28.4274	47.9346	27.8782	48.0672	27.4615	53.9004	27.5184	53.5027	27.1396	49.7338	25.0752	49.0899	25.2646	48.8626	25.5108	54.3549	30.1698	53.9193	30.2645	53.4837	30.3403	53.0292	30.3024	52.5936	30.1888	52.1959	29.9994	51.7792	29.8289	51.3436	29.791	50.908	29.6585	50.4914	29.5448	50.0747	29.3744	49.6391	29.2418	49.2225	29.1092	48.8247	28.882	48.5217
UpperBarton_20131204_SA16127	61.4475	24.3824	60.5309	24.399	56.1978	22.7158	55.7144	21.9991	55.4978	21.2492	62.8142	22.1491	62.1642	21.4158	58.6977	18.3159	57.931	18.1659	57.5144	18.2159	63.3475	25.1657	62.8308	25.299	62.2808	25.349	61.7475	25.3157	61.2142	25.199	60.6976	25.049	60.1976	24.849	59.6976	24.6823	59.1976	24.4824	58.681	24.299	58.2143	24.0324	57.7477	23.7657	57.281	23.4991	56.8311	23.1991	56.4311
UpperBarton_20131204_SA16129	59.0948	20.8443	58.6298	21.7744	54.9924	24.7142	54.0789	24.8637	53.4644	24.5481	57.8325	18.8014	56.7696	19.0671	52.4678	20.4125	52.0028	21.027	51.8699	21.6415	60.4568	19.582	60.2907	20.0803	60.1246	20.5952	59.8754	21.0602	59.5931	21.5087	59.2775	21.9405	58.8623	22.2727	58.4637	22.6048	58.0485	22.937	57.6	23.236	57.1848	23.5682	56.753	23.8671	56.3045	24.1661	55.8395	24.4318	55.3412
UpperBarton_20131204_SA16133	63.8948	28.6448	63.0587	28.7117	58.1758	26.3204	57.8748	25.6348	57.9752	25.0161	65.2492	26.5713	64.9984	25.8522	61.0855	22.1065	60.2995	22.1065	59.7644	22.4576	65.567	29.5645	64.9984	29.6648	64.4299	29.6648	63.878	29.5812	63.3262	29.3973	62.7911	29.2133	62.2727	28.9792	61.7376	28.7618	61.236	28.511	60.7343	28.2435	60.2326	27.9592	59.7644	27.6415	59.2795	27.3405	58.8113	27.006	58.4267
UpperBarton_20140109_SA16204	57.7578	26.3635	56.8822	26.3635	52.8066	24.1825	52.6156	23.5138	52.6793	22.8452	59.1269	24.6601	58.9995	23.8641	55.9429	20.3776	55.2106	20.2343	54.7011	20.3617	59.2065	27.4779	58.697	27.5734	58.1876	27.5575	57.6782	27.4779	57.1846	27.3187	56.723	27.0958	56.2613	26.857	55.8155	26.6182	55.3857	26.3317	54.924	26.1088	54.4942	25.8222	54.0802	25.5198	53.6345	25.2491	53.2524	24.8989	52.9818
UpperBarton_20140109_SA16207	68.5302	27.1433	67.7088	27.666	62.1271	27.666	61.4924	27.2926	61.2497	26.7699	69.1276	24.3617	68.5862	23.5217	62.8738	21.9349	62.1271	22.1589	61.6044	22.663	70.6584	26.9566	70.2103	27.3486	69.669	27.6286	69.1089	27.8527	68.5489	28.0953	67.9515	28.17	67.3541	28.0953	66.7568	28.1887	66.1407	28.1513	65.5433	28.1513	64.9273	28.1327	64.3299	28.1513	63.7326	28.0953	63.1352	28.0393	62.5565
UpperBarton_20140317_SA16977	20.512	12.5908	19.8817	13.5648	16.1288	15.9569	15.5415	15.7421	15.3124	15.4269	19.452	10.4565	18.5496	10.2417	13.9373	11.6741	13.7654	12.3186	13.8227	12.6767	21.8584	11.9319	21.7152	12.4046	21.4287	12.82	21.1565	13.2354	20.8271	13.5935	20.4117	13.88	19.982	14.1235	19.5666	14.3813	19.1655	14.6821	18.7644	14.9686	18.3347	15.1978	17.8907	15.4413	17.4753	15.6991	17.0312	15.914	16.5299
UpperBarton_20140317_SA17000	63.4104	32.6607	62.5803	33.1433	56.9245	33.3942	56.5385	33.2012	56.3841	32.9309	63.7771	30.518	63.1015	29.881	57.8125	28.7615	57.1562	29.1475	56.7122	29.688	65.6109	32.5063	65.109	32.8537	64.5492	33.066	63.9701	33.2784	63.3911	33.4521	62.812	33.5679	62.2136	33.7223	61.6152	33.7416	61.0168	33.7416	60.3991	33.7416	59.8007	33.7416	59.2023	33.7803	58.5846	33.8382	57.9862	33.7996	57.4071
UpperBarton_20140317_SA17003	79.9313	33.458	79.1234	34.1537	74.2091	35.5001	73.4686	35.2532	73.0422	34.8269	79.6396	30.7204	78.5624	30.2491	73.3788	30.0696	72.728	30.5633	72.4812	31.057	81.9958	32.9644	81.6592	33.4356	81.1655	33.7498	80.7167	34.1088	80.223	34.423	79.7069	34.6698	79.1459	34.8493	78.6073	35.0737	78.0463	35.2084	77.5078	35.4103	76.9243	35.5225	76.3633	35.5898	75.7799	35.6796	75.1964	35.7245	74.6354
UpperBarton_20140317_SA17007	72.9544	29.0181	72.0942	29.7944	67.0585	31.7458	66.1562	31.494	65.6946	30.9904	72.5348	26.2275	71.5696	25.7449	65.9884	25.9128	65.3799	26.3534	65.0652	26.815	74.9897	28.1369	74.633	28.6404	74.2133	29.102	73.7307	29.5007	73.2272	29.8574	72.7026	30.1931	72.1571	30.4659	71.6116	30.7596	71.0241	30.9485	70.4156	31.1163	69.8281	31.2842	69.2196	31.452	68.6111	31.5569	68.0027	31.6409	67.3732
UpperBarton_20140317_SA17008	62.1314	22.6085	61.6457	23.3621	57.5259	26.2091	56.8058	26.1253	56.2867	25.9076	61.0596	20.5653	60.0547	20.3476	55.3321	21.9721	54.8464	22.5415	54.7627	22.9936	63.6386	21.7209	63.5214	22.2568	63.2032	22.7089	62.8682	23.1444	62.4998	23.5295	62.0979	23.898	61.629	24.1827	61.16	24.4841	60.7414	24.8525	60.3059	25.1707	59.8203	25.4219	59.3346	25.6732	58.8992	25.9913	58.3633	26.1253	57.8106
UpperBarton_20140317_SA17010	61.9277	25.1346	61.482	25.9575	57.1786	29.8837	56.5099	29.9523	55.5327	29.8323	60.4361	22.7514	59.4074	22.6143	54.0925	25.0317	53.7496	25.7689	53.2867	26.5919	63.4365	23.8658	63.2822	24.4659	63.0765	25.0488	62.8021	25.5975	62.4421	26.0947	61.9963	26.5233	61.5506	26.9519	61.0876	27.3806	60.659	27.8092	60.1961	28.2207	59.6817	28.5636	59.1845	28.9579	58.7559	29.3865	58.173	29.6266	57.5729
UpperBarton_20140317_SA17015	56.8978	29.6653	55.9719	29.756	51.1063	27.7771	50.5798	27.0873	50.3983	26.3429	58.1505	27.5593	57.5695	26.706	53.7206	23.5107	52.8855	23.3292	52.3953	23.547	58.677	30.3552	58.1505	30.5367	57.5695	30.573	56.9885	30.5367	56.4257	30.4459	55.8629	30.337	55.3364	30.101	54.7918	29.9194	54.2471	29.7379	53.7206	29.52	53.2305	29.2295	52.7403	28.9209	52.2319	28.6667	51.7781	28.34	51.3968
UpperBarton_20140317_SA17031	27.3847	70.9556	26.5307	70.9362	21.6011	68.1221	21.2906	67.4622	21.4458	66.8606	29.2867	68.6267	29.1896	67.831	25.2692	63.6776	24.5317	63.6	23.9301	63.8523	29.3061	71.7708	28.7044	71.9066	28.1028	71.829	27.5011	71.732	26.9189	71.5961	26.3561	71.3632	25.7932	71.1109	25.2498	70.8392	24.7452	70.5093	24.2018	70.2181	23.6972	69.8688	23.1926	69.5195	22.688	69.1895	22.2028	68.8014	21.8534
UpperBarton_20140630_SA18199	22.1239	50.8178	20.9855	50.8041	16.3083	48.5546	15.8557	47.8414	15.9243	47.1968	23.5367	48.7467	23.2075	47.91	18.9692	44.4398	18.2011	44.289	17.6662	44.577	23.7698	51.6133	23.2212	51.819	22.6451	51.9013	22.069	51.8465	21.493	51.7505	20.958	51.5447	20.4231	51.2978	19.8745	51.1332	19.3396	50.9001	18.8184	50.6258	18.3383	50.3103	17.8582	49.9811	17.3645	49.6656	16.8981	49.3365	16.5689
UpperBarton_20141210_SA51406	57.1204	15.1607	56.6497	16.021	53.0462	19.3972	52.4131	19.592	51.7638	19.3972	55.8218	13.294	54.7505	13.3752	50.3354	15.5178	49.9783	16.1184	49.9296	16.7352	58.4352	13.8784	58.3053	14.414	58.0943	14.9172	57.8346	15.4042	57.51	15.8424	57.1691	16.2645	56.8282	16.7027	56.4387	17.0923	56.0329	17.4494	55.6108	17.8065	55.1726	18.1311	54.7343	18.472	54.296	18.7967	53.8091	19.0726	53.3059
UpperBarton_20141210_SA51409	62.8692	14.5209	62.4088	15.1952	58.7251	17.2344	58.1331	17.1686	57.7384	16.9055	62.2608	12.7613	61.3892	12.6462	57.3766	13.5671	56.9984	13.9618	56.9819	14.4552	64.1684	13.8796	64.0039	14.3072	63.7244	14.6525	63.4119	14.9978	63.083	15.3103	62.7212	15.5734	62.3594	15.853	61.9648	16.0832	61.5536	16.2806	61.1425	16.4779	60.7314	16.6752	60.3203	16.8561	59.9091	17.0535	59.4816	17.185	59.0211
UpperBarton_20141210_SA51410	66.2693	17.0899	65.684	17.8591	59.7644	20.15	58.9952	19.9995	58.4936	19.4979	65.5168	13.9963	64.3964	13.5615	58.5103	14.2806	57.7578	14.8993	57.5738	15.5013	68.1756	16.2538	67.8913	16.8558	67.4398	17.3407	66.9883	17.8424	66.4699	18.2604	65.868	18.5447	65.2325	18.7621	64.6473	19.0631	64.0285	19.3306	63.3931	19.548	62.7577	19.7654	62.1222	19.9493	61.5035	20.1835	60.8346	20.2671	60.1825
UpperBarton_20141210_SA51412	26.0966	60.9086	25.1429	61.2046	19.5684	59.5931	19.0093	59.1162	18.927	58.5735	27.2642	58.2282	26.7544	57.4882	21.6239	54.5283	20.9497	54.5612	20.4728	54.8901	28.0535	61.6157	27.4615	61.8294	26.8531	61.9445	26.2282	62.0103	25.6033	61.9445	24.9949	61.8459	24.3865	61.6979	23.778	61.5334	23.1696	61.4183	22.5776	61.2539	21.9856	61.0237	21.4101	60.8099	20.8181	60.5633	20.2755	60.2837	19.8315
UpperBarton_20141210_SA51413	47.9777	14.8395	47.6059	15.7124	43.9526	19.01	43.3384	19.0585	42.8696	18.8161	46.5875	12.9158	45.7146	12.9805	41.4794	15.1304	41.1723	15.68	41.0106	16.3913	49.2871	13.7241	49.1901	14.2575	48.9638	14.7425	48.7213	15.2113	48.3657	15.6316	48.01	16.0195	47.6221	16.3913	47.2503	16.7954	46.8623	17.1511	46.4259	17.4905	46.0218	17.8462	45.6176	18.1856	45.1973	18.5413	44.7124	18.7514	44.2113
UpperBarton_20141210_SA51417	56.4465	30.7395	55.9845	31.5315	51.5955	33.9735	50.7375	33.858	50.292	33.5445	55.5555	28.677	54.4665	28.446	49.731	29.469	49.2855	29.997	49.2195	30.6075	57.981	29.8485	57.7995	30.36	57.486	30.8055	57.1395	31.218	56.727	31.581	56.298	31.911	55.8525	32.2245	55.3905	32.5215	54.945	32.8185	54.45	33.066	53.9715	33.3135	53.4435	33.4785	52.965	33.7095	52.437	33.8745	51.8925
UpperBarton_20150213_SA51879	63.0408	27.3709	62.2676	27.9036	57.68	28.6768	57.113	28.419	56.8552	28.2128	62.9205	25.0342	62.1645	24.6734	57.5769	24.261	57.0786	24.5703	56.8724	24.9654	64.6902	27.1819	64.3466	27.5771	63.9514	27.9036	63.4875	28.1613	63.0064	28.3331	62.5081	28.4878	61.9755	28.5221	61.4772	28.6596	60.9617	28.7627	60.4463	28.8486	59.9308	28.9001	59.4154	28.9345	58.8999	28.986	58.3844	28.9345	57.8862
UpperBarton_20150213_SA51903	67.6084	22.6284	66.8991	23.2166	62.1762	24.4622	61.5015	24.1508	61.1036	23.7875	67.3143	20.3967	66.4839	19.7912	61.5015	19.6874	60.9306	20.0853	60.7057	20.6389	69.2346	22.4554	68.854	22.8187	68.4561	23.1301	68.0063	23.4069	67.5219	23.5972	67.0375	23.7875	66.5531	23.9605	66.0687	24.1162	65.5497	24.22	65.048	24.3238	64.529	24.4276	64.0273	24.5141	63.5083	24.6179	63.0066	24.5487	62.4876
UpperBarton_20150409_SA53100	62.4912	30.519	61.8338	31.1072	56.3321	32.4567	55.7438	32.1626	55.4497	31.7646	62.3701	27.8546	61.557	27.3183	55.9687	26.9377	55.3632	27.3183	55.1729	27.8027	64.5154	30.2421	64.1175	30.692	63.6504	31.0899	63.1313	31.384	62.6123	31.6781	62.0414	31.8684	61.4532	32.0069	60.8649	32.1626	60.3113	32.3702	59.7231	32.5086	59.1175	32.5778	58.512	32.6297	57.9237	32.7162	57.3182	32.6989	56.7473
UpperBarton_20150409_SA53101	51.6199	26.097	51.0283	26.6711	46.6266	28.4109	45.8089	28.3239	45.3044	28.0804	51.0979	23.5743	50.2802	23.3307	45.635	23.6787	44.9738	24.1658	44.6607	24.6878	53.4293	25.4359	53.1509	25.8708	52.7681	26.2536	52.368	26.5841	51.9156	26.8625	51.4285	27.0887	50.9413	27.2975	50.4542	27.4888	49.9497	27.6454	49.4799	27.8542	48.958	27.9586	48.4534	28.0978	47.9315	28.237	47.4269	28.3935	46.905
UpperBarton_20150409_SA53107	64.2745	30.585	63.3193	30.9603	58.3213	30.8409	57.5366	30.3121	57.4343	29.6639	64.7351	28.248	63.9504	27.5657	59.3618	25.8429	58.4578	26.0134	58.1337	26.5081	66.168	30.8238	65.7245	31.1479	65.1957	31.3526	64.6669	31.5232	64.121	31.6255	63.5752	31.6255	63.0123	31.6255	62.4664	31.5914	61.9035	31.5232	61.3576	31.472	60.7947	31.4038	60.2489	31.3697	59.6859	31.3526	59.1571	31.2161	58.6625
UpperBarton_20150409_SA53113	70.065	34.8768	69.2	35.3958	63.1969	35.7764	62.4357	35.2747	62.0724	34.7384	70.4629	32.2126	69.5979	31.6071	63.6813	30.0501	62.9201	30.448	62.5914	31.1227	72.2275	34.9114	71.7777	35.3785	71.2414	35.7418	70.6359	36.0013	70.0131	36.1743	69.3557	36.2608	68.7156	36.2608	68.0582	36.33	67.4181	36.3992	66.7607	36.3992	66.1033	36.3646	65.4632	36.3127	64.8058	36.33	64.183	36.157	63.5948
UpperBarton_20150409_SA53116	39.86	20.0499	39.5005	20.8204	36.1788	23.9537	35.3912	23.9366	34.8946	23.7311	38.7128	18.2178	37.8739	18.1664	33.816	19.7245	33.3537	20.3752	33.1482	21.0087	41.127	18.9712	41.0757	19.4677	40.9216	19.9643	40.7161	20.4094	40.3908	20.8032	40.0484	21.1799	39.6546	21.4881	39.295	21.8477	38.9012	22.173	38.5245	22.5154	38.1136	22.8236	37.7026	23.1147	37.3088	23.4229	36.8637	23.6455	36.3843
UpperBarton_20151008_SA53441	55.8339	34.1985	54.9975	34.053	50.8341	31.5986	50.5068	30.9622	50.525	30.3441	57.3611	32.5076	57.0883	31.8349	53.7976	28.0715	53.1794	27.8533	52.5249	27.9806	57.2338	35.2893	56.7065	35.3257	56.1975	35.253	55.6702	35.1257	55.1793	34.9621	54.7066	34.7257	54.2703	34.453	53.8339	34.1621	53.3794	33.8712	52.9249	33.6349	52.5249	33.2894	52.1249	32.944	51.6886	32.6531	51.3068	32.2713	51.0341
UpperBarton_20160204_SA53961	70.3165	16.9045	69.7213	17.599	64.8999	19.5235	64.0467	19.2855	63.4912	18.8489	69.8205	14.4244	68.9078	14.1665	63.8285	14.107	63.1737	14.722	62.8761	15.3569	72.122	16.349	71.8244	16.8252	71.4474	17.222	71.0109	17.599	70.5348	17.8767	70.0189	18.095	69.4832	18.2537	68.9673	18.5117	68.4514	18.7299	67.9356	18.9283	67.3999	19.087	66.8642	19.2458	66.3285	19.4045	65.7729	19.5434	65.2174
UpperBarton_20160204_SA53965	66.8473	26.5839	66.1985	27.1246	61.9811	28.6385	61.4224	28.4223	61.0259	28.1339	66.4148	24.277	65.6578	24.0787	61.1881	24.0607	60.7555	24.4212	60.5393	24.7816	68.5234	25.9711	68.199	26.3676	67.8746	26.7461	67.4781	27.0525	67.0456	27.3048	66.613	27.5572	66.1444	27.7374	65.6938	27.9717	65.2252	28.1699	64.7566	28.3322	64.252	28.4042	63.7654	28.5304	63.2968	28.6926	62.7921	28.7467	62.2875
UpperBarton_20160505_SA54341	62.9584	20.4326	62.3086	20.92	57.5254	21.7503	56.8394	21.4254	56.3702	20.9921	62.814	18.1222	62.0559	17.6168	57.5434	16.8768	56.9297	17.0934	56.316	17.2919	64.7815	20.1258	64.4385	20.5409	64.0233	20.8658	63.5721	21.1365	63.0847	21.3531	62.5613	21.4795	62.0378	21.6059	61.5324	21.7503	61.009	21.8224	60.4856	21.9127	59.944	21.9307	59.4206	21.9849	58.8791	22.0029	58.3556	21.9488	57.8322
UpperBarton_20160802_SA11969	62.133	20.0846	61.564	20.7052	56.9265	22.4292	56.1334	22.2051	55.668	21.7914	61.5468	17.6193	60.702	17.4641	55.8921	17.7055	55.2025	18.1365	54.9266	18.6882	63.9432	19.4467	63.7018	19.9294	63.3225	20.3087	62.9088	20.6708	62.4605	20.9811	61.9778	21.2052	61.4606	21.3948	60.9606	21.55	60.4434	21.7224	59.9607	21.981	59.4435	22.1017	58.9091	22.2051	58.3919	22.3775	57.8574	22.4982	57.323
UpperBarton_20170307_SA56139	42.7625	53.6424	41.9175	53.7481	37.217	53.3079	36.6888	52.9558	36.4071	52.4981	43.3611	51.4066	42.7625	50.7552	38.3789	48.8539	37.7275	49.0123	37.217	49.2764	44.5759	53.7129	44.1181	53.9945	43.6252	54.153	43.097	54.241	42.5689	54.2938	42.0407	54.2586	41.5126	54.2586	40.9844	54.2234	40.4563	54.1354	39.9281	54.0826	39.4	54.0121	38.8894	53.9065	38.3613	53.8185	37.8684	53.6424	37.393
UpperBarton_20170524_SA56172	45.7363	20.5284	44.8867	20.8209	40.5136	21.364	39.9844	21.1133	39.6362	20.8209	45.8755	18.3001	45.221	17.7987	40.8061	16.7403	40.2072	17.0327	39.7198	17.4784	47.3518	20.4727	46.9897	20.793	46.558	21.0019	46.0984	21.183	45.6249	21.2805	45.1513	21.364	44.6639	21.4058	44.1904	21.4615	43.7029	21.5033	43.2294	21.6008	42.742	21.6147	42.2684	21.6147	41.781	21.6565	41.3075	21.5868	40.8479
UpperBarton_20171108_SA56511	59.017	62.4962	58.3368	62.7578	54.2035	62.1038	53.8111	61.7376	53.6542	61.4237	59.5663	60.6389	59.0954	60.1157	55.3022	58.4938	54.7529	58.5722	54.3343	58.7815	60.5081	62.7578	60.1157	62.9933	59.671	63.0718	59.2262	63.1502	58.7815	63.2026	58.3368	63.1764	57.8659	63.1502	57.4212	63.1241	56.9765	63.0718	56.5318	62.9933	56.087	62.8886	55.6423	62.784	55.2238	62.627	54.8052	62.4439	54.4128
UpperBarton_20171108_SA56513	37.2174	17.6878	36.5742	18.3748	32.3789	20.7137	31.7795	20.5383	31.3118	20.2459	36.3988	15.4366	35.4194	15.3489	30.7709	16.5037	30.3031	17.0007	30.04	17.4977	38.957	16.8838	38.7523	17.3954	38.46	17.8632	38.0945	18.2579	37.6706	18.6087	37.2174	18.9303	36.7497	19.2081	36.2526	19.4566	35.8141	19.7782	35.3317	20.0413	34.8055	20.2313	34.2938	20.4067	33.7822	20.5968	33.2559	20.7429	32.7005
Parthenia_20160229_SA53974	51.4339	14.8759	51.1898	15.8093	46.9396	19.7293	46.2647	19.758	45.7765	19.5713	49.9119	12.7939	49.036	12.9949	44.1826	15.6944	43.9673	16.4267	44.0391	17.0298	53.1714	13.5405	53.1139	14.1723	52.8986	14.7611	52.6401	15.3354	52.3098	15.8667	51.9078	16.3693	51.4339	16.7713	50.9601	17.1877	50.5006	17.6185	49.998	18.0062	49.4955	18.3939	48.9929	18.7672	48.4903	19.1405	47.9303	19.4421	47.3273
Parthenia_20160229_SA53986	23.9173	38.8152	23.0384	38.4261	18.01	35.8759	17.693	34.9538	17.8803	34.2478	25.7903	36.6684	25.4589	35.9047	21.6552	31.3518	20.7331	31.1789	20.1424	31.4815	25.8191	40.1551	25.1852	40.2127	24.5368	40.1551	23.9029	40.0542	23.2977	39.8381	22.707	39.5788	22.1595	39.2618	21.5832	38.9592	21.0357	38.6423	20.4882	38.2821	19.9551	37.9219	19.4364	37.5472	18.9177	37.1582	18.4711	36.7116	18.1397
Parthenia_20160229_SA53988	44.4888	29.4767	43.6388	29.7649	38.2506	28.8572	37.7463	28.3386	37.6455	27.8487	45.0795	27.1428	44.5032	26.408	39.0862	24.708	38.4523	25.0394	38.1353	25.5724	46.3617	29.9233	45.8863	30.2835	45.31	30.4564	44.7337	30.6005	44.143	30.6149	43.5524	30.5717	42.9761	30.4132	42.3854	30.3267	41.7947	30.1971	41.2184	30.0962	40.6277	29.981	40.0515	29.8369	39.4608	29.7072	38.9133	29.4767	38.4667
Parthenia_20160229_SA53989	46.4306	4.21184	46.1154	4.94247	42.4336	7.36356	41.8749	7.40654	41.5024	7.23463	45.4277	2.43542	44.5968	2.33514	40.5712	3.85369	40.2417	4.28347	40.2561	4.69893	47.6913	3.33796	47.548	3.79639	47.3045	4.19752	47.0323	4.59865	46.7314	4.97112	46.3589	5.27197	45.9865	5.58714	45.6283	5.88799	45.2415	6.17451	44.8404	6.4467	44.4249	6.67592	44.0095	6.90513	43.594	7.14867	43.1356	7.30626	42.6628
Parthenia_20160229_SA53990	52.3794	27.4538	51.6081	27.611	47.0801	27.1396	46.7944	26.7682	46.6087	26.454	53.0222	25.3827	52.4223	24.8684	48.2228	23.3258	47.7371	23.5543	47.4657	24.0114	54.1364	27.711	53.7221	27.9966	53.2365	28.1252	52.7365	28.168	52.2223	28.1823	51.7224	28.1823	51.2224	28.1109	50.7225	28.0538	50.2225	27.9538	49.7369	27.8681	49.2369	27.7681	48.737	27.6967	48.2371	27.6253	47.7514	27.511	47.3086
Parthenia_20160229_SA53991	57.64	4.45692	57.4828	5.28545	54.9115	9.65666	54.4258	9.8138	53.883	9.8138	55.7544	3.08556	54.9544	3.5284	51.3831	6.88537	51.3117	7.39963	51.4689	7.88532	58.6971	3.05699	58.7256	3.6141	58.6828	4.15693	58.5685	4.69977	58.3685	5.21403	58.1114	5.714	57.8543	6.19969	57.5971	6.68538	57.2971	7.15679	56.9971	7.62819	56.6543	8.05674	56.2829	8.471	55.9829	8.94241	55.5972	9.32811	55.1115
Parthenia_20160811_DSC4836	62.6674	8.77516	62.3916	9.34408	59.6504	12.137	59.1849	12.1887	58.9091	12.068	61.5985	7.46492	60.9606	7.63732	57.5816	9.72336	57.4609	10.1888	57.5471	10.5509	63.788	7.94764	63.7535	8.37864	63.5984	8.77516	63.357	9.1372	63.1156	9.482	62.8226	9.79232	62.495	10.0509	62.1847	10.3612	61.9261	10.6888	61.633	10.9991	61.3227	11.2922	60.9951	11.568	60.6676	11.8439	60.2883	12.0335	59.8573
Parthenia_20161110_SA55533	45.0861	60.1905	44.4043	60.9423	39.2995	62.9177	38.5303	62.7079	38.1457	62.1485	44.5441	57.7256	43.67	57.2885	38.1807	57.6382	37.7786	58.2325	37.5513	58.7745	47.0965	59.6835	46.8168	60.2255	46.3797	60.6276	45.9077	61.0122	45.4008	61.3443	44.8763	61.624	44.2994	61.7989	43.74	62.0261	43.1631	62.166	42.6036	62.3933	42.0267	62.5856	41.4498	62.7429	40.8729	62.9177	40.2785	62.9876	39.6841
Parthenia_20161110_SA55535	55.2358	31.1637	54.3093	31.324	48.8213	31.0033	48.3046	30.2906	48.3759	29.6848	56.0554	28.5444	55.3783	27.9743	50.1042	25.4619	49.2668	25.8183	48.5719	26.3885	57.5343	31.7873	56.9998	32.1437	56.394	32.304	55.7703	32.4644	55.1467	32.5535	54.5231	32.5891	53.8995	32.4644	53.258	32.3753	52.6344	32.2684	52.0107	32.1615	51.3871	32.0368	50.7635	31.9477	50.1399	31.8229	49.534	31.6091	49.053
Parthenia_20161117_SA55556	16.915	26.8413	17.6631	26.2939	22.2796	25.929	22.8635	26.2392	23.1919	26.5676	16.8785	28.9215	17.3529	29.4142	21.9876	30.3813	22.535	30.1805	22.9182	29.8521	15.5647	26.9143	15.9479	26.6224	16.3676	26.3852	16.8055	26.148	17.2434	25.9472	17.7178	25.856	18.1923	25.7283	18.6484	25.6188	19.1411	25.6188	19.6338	25.5823	20.1082	25.5458	20.6009	25.5276	21.0753	25.5458	21.5497	25.6553	21.9876
Parthenia_20161117_SA55559	10.9749	20.0881	11.8791	20.0881	16.7194	21.7547	16.8612	22.2866	16.9853	22.9426	9.94653	22.0561	10.3366	22.8362	14.2727	26.0986	14.9818	26.1163	15.496	25.8503	9.41463	19.1129	9.96426	19.042	10.5139	18.9888	11.0635	19.0243	11.6131	19.1307	12.145	19.2548	12.6769	19.3966	13.1911	19.6094	13.7053	19.8399	14.2372	19.9994	14.7336	20.2477	15.2301	20.4781	15.7265	20.7264	16.152	21.0632	16.5244
Parthenia_20161117_SA55572	9.14125	26.3525	9.74828	25.924	15.1223	24.8171	15.7472	25.2277	16.1043	25.6205	9.17696	28.7449	9.96253	29.352	15.2116	30.1911	15.8186	29.8519	16.1222	29.3877	7.42726	26.4418	7.83791	26.049	8.28426	25.6919	8.80202	25.4419	9.33764	25.2277	9.87326	25.067	10.4267	24.9242	10.9981	24.7992	11.5515	24.6921	12.1229	24.6028	12.6763	24.5314	13.2477	24.4778	13.819	24.4957	14.3903	24.5671	14.9259
Parthenia_20161117_SA55582	58.2834	11.3599	58.2834	12.3316	56.1634	16.342	55.6687	16.6953	55.1564	16.713	56.3931	10.1055	55.492	10.4765	52.4003	13.7096	52.2413	14.3633	52.259	14.8579	59.0431	10.0525	59.1844	10.5295	59.1668	11.0242	59.1314	11.5189	58.9901	11.9959	58.8134	12.4552	58.6014	12.8969	58.4248	13.3739	58.1774	13.7979	57.9301	14.2219	57.6828	14.6636	57.4177	15.07	57.1174	15.4763	56.7817	15.8296	56.3931
Parthenia_20161117_SA55588	34.4829	46.9287	33.8447	46.3436	32.0363	42.1418	32.2313	41.61	32.515	41.2199	36.8054	46.3968	37.0713	45.6344	36.5217	41.1136	36.0962	40.6881	35.5289	40.564	34.9616	48.2229	34.5361	48.0101	34.1638	47.691	33.8269	47.3542	33.5787	46.9287	33.3305	46.5209	33.1	46.0954	32.905	45.6522	32.71	45.209	32.515	44.7657	32.3732	44.3048	32.2313	43.8438	32.1072	43.3651	32.0718	42.8865	32.054
Parthenia_20161117_SA55589	6.47665	13.3625	7.47306	13.3981	10.6046	15.2842	10.7292	15.64	10.8359	16.0315	5.49804	14.8038	5.87169	15.6223	8.77195	18.1667	9.1456	18.2378	9.53705	18.1844	5.55142	12.7754	5.94286	12.6864	6.3521	12.7042	6.76134	12.7576	7.15279	12.8465	7.54423	12.9889	7.91789	13.149	8.27374	13.3447	8.6296	13.5405	9.00326	13.7006	9.34132	13.9319	9.67939	14.1632	9.99967	14.4123	10.2666	14.7148	10.4623
Parthenia_20161117_SA55601	26.9994	42.7232	27.7063	42.4473	32.051	41.9818	32.4993	42.2577	32.8613	42.6887	26.9132	44.7921	27.5856	45.1714	31.8441	45.9473	32.3269	45.7231	32.6889	45.3783	25.3788	42.9128	25.7408	42.6025	26.1546	42.3439	26.5856	42.1542	27.0511	42.0163	27.5166	41.8956	27.9821	41.7922	28.4649	41.6887	28.9476	41.706	29.4131	41.6887	29.8959	41.637	30.3786	41.637	30.8614	41.6543	31.3441	41.7232	31.7924
Parthenia_20161117_SA55613	14.2752	26.139	15.1377	25.8221	19.415	25.9277	19.8551	26.2974	20.0839	26.667	13.8704	28.3216	14.5393	28.8145	18.8693	30.029	19.327	29.7474	19.7142	29.501	12.7614	25.9982	13.1663	25.7517	13.6063	25.5757	14.064	25.4525	14.5393	25.3645	15.0145	25.3117	15.4898	25.2941	15.965	25.2589	16.4403	25.2765	16.9155	25.2765	17.3908	25.3117	17.866	25.3469	18.3413	25.4349	18.7989	25.5405	19.2214
Parthenia_20170223_SA56092	5.92149	21.5645	6.60403	21.1403	11.1051	20.6053	11.677	20.9373	12.0828	21.2878	5.88459	23.7597	6.54868	24.1471	11.0682	25.1248	11.6032	24.8297	11.8799	24.4238	4.03989	21.5461	4.46417	21.2509	4.9069	20.9927	5.36808	20.7529	5.86615	20.5869	6.34577	20.4024	6.84384	20.2733	7.36035	20.1995	7.87687	20.181	8.39339	20.1072	8.9099	20.0703	9.42642	20.0519	9.94293	20.0519	10.441	20.181	10.9022
Parthenia_20170223_SA56133	18.8208	11.2502	19.6131	11.5143	22.6061	15.282	22.5181	15.9862	22.3068	16.3912	16.9898	12.2186	17.0954	12.8524	18.5919	17.3595	19.1729	17.6588	19.7363	17.7292	18.1166	9.64809	18.5919	9.82415	19.0321	10.1058	19.4546	10.4051	19.8244	10.7397	20.1765	11.127	20.4758	11.5319	20.7927	11.9545	21.1272	12.3418	21.4441	12.7467	21.7082	13.1693	21.9899	13.6094	22.2892	14.032	22.5181	14.4897	22.5533
Parthenia_20170518_SA56162	47.0172	16.9995	46.3876	17.3143	42.7395	16.7773	42.4618	16.4255	42.3877	16.0921	47.4616	15.2588	46.9987	14.7774	43.5543	13.4441	43.1655	13.5737	42.8877	13.7774	48.3875	17.3328	48.0542	17.5736	47.6653	17.7217	47.2765	17.8143	46.8505	17.8143	46.4617	17.7588	46.0543	17.6847	45.6469	17.6477	45.2395	17.6106	44.8321	17.5736	44.4247	17.518	44.0173	17.4254	43.6284	17.3328	43.2395	17.1662	42.9062
Parthenia_20170817_SA56189	46.5999	45.4433	45.9059	45.3721	41.3509	43.5039	41.1552	42.9523	41.084	42.4541	47.881	43.237	47.5607	42.6854	43.6818	39.536	43.0413	39.536	42.6498	39.7318	48.3792	46.2618	47.8454	46.3686	47.2938	46.3864	46.76	46.3508	46.2262	46.244	45.6924	46.0661	45.212	45.8348	44.696	45.6213	44.2156	45.3899	43.6996	45.1764	43.2192	44.9273	42.7388	44.6604	42.2762	44.3935	41.8491	44.0377	41.4755
Parthenia_20170817_SA56237	28.564	53.0968	27.5951	53.0622	22.5259	50.9687	22.128	50.2767	22.2318	49.7231	29.9826	50.9168	29.6539	49.9999	25.3114	46.2975	24.5328	46.2975	24.083	46.6954	30.3633	54.0656	29.7923	54.2213	29.2041	54.2386	28.6159	54.2213	28.0449	54.1002	27.474	53.9099	26.9377	53.685	26.384	53.4774	25.865	53.2352	25.3287	52.9757	24.8096	52.6815	24.3079	52.3874	23.8062	52.076	23.2871	51.7992	22.8892
Parthenia_20171109_SA56566	54.127	34.1277	53.3605	34.4587	49.0575	33.9535	48.5349	33.5354	48.3781	33.0128	54.5974	32.1592	54.0399	31.5494	50.2596	29.7551	49.6324	29.8944	49.3014	30.1906	55.5381	34.3891	55.1026	34.5458	54.6671	34.7026	54.2142	34.8246	53.7612	34.8943	53.2908	34.8943	52.8379	34.9117	52.3675	34.8943	51.9146	34.8246	51.4442	34.7549	50.9913	34.6678	50.5383	34.5633	50.0854	34.4762	49.6499	34.3019	49.2492
Eliza_20140724_SA18240	50.5548	44.1773	49.6745	44.4928	44.2603	43.6292	43.8285	43.131	43.7123	42.4334	51.3852	41.8688	50.7873	41.0384	45.8381	38.8959	45.3731	38.9624	44.8582	39.4772	52.0495	44.742	51.5014	44.825	50.9533	44.9246	50.3887	45.0077	49.8406	45.0575	49.2759	45.0409	48.7279	44.9911	48.1798	44.8914	47.6317	44.7918	47.0837	44.6921	46.5522	44.5094	46.0208	44.3434	45.4727	44.1939	44.9412	44.0278	44.4762
Eliza_20140724_SA18247	43.0628	28.1384	42.392	28.8091	37.8812	31.3748	37.1769	31.2071	36.8247	30.8885	42.1405	25.8746	41.2685	25.6398	36.1204	26.6292	35.6006	27.3167	35.5167	27.9707	44.9912	27.2496	44.7565	27.7862	44.3875	28.2558	44.0186	28.7085	43.5826	29.0942	43.0963	29.4296	42.5597	29.6979	42.0399	29.983	41.5536	30.3016	41.0337	30.5867	40.4971	30.8214	39.9605	31.0562	39.4239	31.3077	38.8538	31.4586	38.2669
Eliza_20140724_SA18250	60.6025	35.5209	59.7043	35.7751	55.1116	35.1989	54.5354	34.7922	54.3829	34.3177	61.382	33.4025	60.755	32.606	56.603	30.5893	55.8743	30.6571	55.3997	30.9791	62.1616	35.9615	61.721	36.1649	61.2295	36.2666	60.755	36.3344	60.2635	36.3344	59.7721	36.2835	59.2806	36.2666	58.7891	36.2157	58.3146	36.1141	57.8232	36.0463	57.3486	35.9785	56.8572	35.8768	56.3827	35.809	55.9082	35.6565	55.5014
Eliza_20141013_SA50445	6.32257	17.3709	7.35482	17.0484	12.3871	18.8387	12.7097	19.4193	12.7419	20.1129	5.27418	19.6451	5.62902	20.4354	10.0968	23.6935	10.6451	23.629	11.0806	23.3709	4.74193	16.5967	5.27418	16.4032	5.8387	16.3225	6.41934	16.2903	6.98386	16.3548	7.53224	16.4838	8.08063	16.629	8.64514	16.758	9.1774	16.9516	9.72579	17.1129	10.258	17.3225	10.7742	17.5645	11.2742	17.8387	11.7419	18.1613	12.129
Eliza_20141014_SA50464	62.3829	7.43184	62.1283	8.1798	58.9773	12.2538	58.293	12.3493	57.6723	12.1583	60.7915	5.42667	59.8366	5.53807	55.4921	8.02066	55.2375	8.80044	55.2534	9.50066	63.5128	6.09506	63.465	6.63614	63.3377	7.1613	63.1468	7.67055	62.8921	8.14797	62.6216	8.62539	62.3351	9.08689	62.0328	9.53249	61.7145	9.97808	61.3644	10.3918	60.9984	10.7897	60.6005	11.1716	60.2027	11.5376	59.7571	11.84	59.2478
Eliza_20141014_SA50478	62.4138	8.8802	62.4926	9.82658	60.379	14.2746	59.7954	14.5269	59.2749	14.6373	60.6314	7.66568	59.7639	8.04423	56.4516	11.6562	56.3412	12.2556	56.4042	12.8077	63.297	7.49217	63.4075	8.01268	63.3759	8.53319	63.2655	9.03793	63.1393	9.55844	62.9974	10.0632	62.8239	10.5679	62.6661	11.0569	62.4453	11.5458	62.1772	11.9875	61.9406	12.4607	61.6567	12.9181	61.357	13.344	60.9942	13.7225	60.6156
Eliza_20141014_SA50487	56.7142	26.2076	56.0295	25.7936	52.9088	22.3067	52.861	21.5106	53.0203	20.8897	58.7203	25.1408	58.7522	24.3447	57.367	19.9662	56.746	19.4726	56.2683	19.2019	57.8765	27.7839	57.351	27.7361	56.8575	27.561	56.3957	27.2744	56.0136	26.9241	55.6155	26.5738	55.2653	26.1598	54.8991	25.7936	54.5488	25.3956	54.2303	24.9657	53.9278	24.5358	53.6571	24.0741	53.4183	23.5964	53.2272	23.1028	53.0521
Eliza_20141014_SA50504	60.6989	24.052	60.3784	24.9494	56.6128	28.4106	55.9238	28.3785	55.427	28.01	59.6413	22.033	58.776	22.0971	53.8727	23.7636	53.6644	24.3405	53.6964	24.9814	62.1731	23.2348	62.109	23.7636	61.8687	24.2603	61.5161	24.6609	61.1957	25.1096	60.8592	25.5262	60.4586	25.8788	60.0259	26.1992	59.5933	26.5518	59.1927	26.9043	58.76	27.2408	58.3113	27.5292	57.8787	27.8497	57.414	28.1221	56.9012
Eliza_20141014_SA50524	56.4529	17.0245	56.2156	17.7048	53.7157	21.2648	53.1303	21.4546	52.4816	21.423	54.8707	15.4106	54.1429	15.5688	50.662	18.1795	50.5196	18.8282	50.5988	19.4611	57.4971	15.6321	57.513	16.1226	57.418	16.5973	57.2915	17.0719	57.0541	17.4991	56.8484	17.9421	56.5795	18.3535	56.3105	18.7491	56.0415	19.1604	55.7251	19.5402	55.4086	19.9041	55.0606	20.2522	54.7125	20.6002	54.3644	20.9167	53.9056
Eliza_20141014_SA50555	7.9811	5.45825	8.93312	5.61692	12.4873	8.66338	12.4715	9.15526	12.2176	9.58367	6.23573	6.94975	6.3468	7.77483	8.77445	11.8526	9.34566	11.9637	10.0279	11.9796	6.79108	4.42689	7.29882	4.41103	7.77483	4.55383	8.25084	4.7125	8.71098	4.91877	9.13939	5.17264	9.55193	5.45825	9.96448	5.75972	10.3453	6.07706	10.7261	6.41027	11.0752	6.75934	11.4401	7.10842	11.7892	7.45749	12.1065	7.85417	12.2969
Eliza_20150211_SA51735	65.0819	16.6102	64.8805	17.4323	61.3907	21.543	60.7531	21.6436	60.2162	21.4423	63.2195	14.5969	62.3806	14.7479	57.9009	17.9189	57.8673	18.5397	58.0015	19.0598	66.4577	15.2344	66.4409	15.8217	66.2731	16.3753	66.0885	16.929	65.8201	17.4659	65.5013	17.9357	65.0986	18.3719	64.7127	18.8249	64.3101	19.2276	63.8906	19.647	63.4712	20.0665	63.0685	20.4692	62.6323	20.8886	62.1625	21.2242	61.6591
Eliza_20150819_SA53356	57.8628	26.3336	57.1867	26.8318	52.952	28.1485	52.4004	27.8994	52.1335	27.4724	57.4714	24.3052	56.6885	24.0206	52.3114	24.2341	51.9022	24.6255	51.7954	25.0703	59.4108	26.0134	59.1439	26.4226	58.7881	26.7429	58.361	26.9742	57.934	27.1877	57.4714	27.3656	57.0088	27.4902	56.5462	27.6503	56.0835	27.7927	55.6209	27.935	55.1405	28.024	54.6601	28.0774	54.1797	28.1663	53.6993	28.2197	53.2189
Eliza_20160708_SA54663	65.62	24.4029	65.0805	25.0683	59.9733	27.6399	59.1641	27.496	58.6965	27.2083	64.8107	21.6335	63.9475	21.4537	58.4807	21.9932	57.7434	22.6586	57.6535	23.288	67.5801	23.7196	67.3104	24.277	66.8968	24.7086	66.4472	25.1402	65.9796	25.5179	65.4761	25.8596	64.9186	26.1473	64.3791	26.417	63.8396	26.7227	63.3002	27.0105	62.7427	27.2263	62.1492	27.3701	61.5558	27.5679	60.9624	27.6758	60.3509
Eliza_20160829_SA55100	46.6101	30.5043	45.6948	30.5219	40.907	29.1489	40.5198	28.5152	40.5374	27.952	47.3494	28.4448	46.8213	27.7584	42.3504	25.5581	41.6287	25.6461	41.2591	26.0334	48.2471	31.1027	47.7718	31.3844	47.2614	31.5428	46.7157	31.578	46.17	31.5428	45.642	31.4196	45.1315	31.2259	44.6035	31.0851	44.0754	30.9267	43.565	30.7507	43.0897	30.4867	42.6144	30.2226	42.1216	29.9938	41.6287	29.765	41.2239
Eliza_20141016_SA50862	59.7704	11.3541	59.222	12.0637	53.9804	13.6443	53.303	13.354	52.8515	12.854	59.2704	8.7575	58.3834	8.54784	53.1579	8.64461	52.5289	9.09619	52.3354	9.62842	61.6573	10.9348	61.3832	11.4509	60.98	11.8702	60.5284	12.2412	60.0284	12.5315	59.4801	12.7411	58.9156	12.8863	58.3511	13.0798	57.8028	13.2572	57.2221	13.4024	56.6577	13.5314	56.0771	13.612	55.4964	13.6927	54.9158	13.7411	54.3514
Eliza_20150212_SA51795	64.9115	22.5074	64.3142	23.2241	59.6557	25.323	58.9732	25.2377	58.4954	24.8964	64.2972	20.1867	63.3416	19.8454	58.4442	20.8181	57.9493	21.2447	57.591	21.8249	66.7202	21.859	66.4131	22.3368	66.0547	22.7804	65.6452	23.1558	65.1845	23.4801	64.6896	23.7702	64.1606	23.9408	63.6658	24.2138	63.1368	24.4186	62.6078	24.6404	62.0788	24.8452	61.5669	25.05	61.0209	25.2206	60.4578	25.2718	59.8946
Eliza_20150820_SA53413	62.7235	30.3223	61.7916	30.9675	56.2361	30.6449	55.6805	29.946	55.4655	29.3904	63.2611	27.9747	62.6339	27.1324	57.5085	24.8385	56.7916	25.1611	56.254	25.5733	64.4618	30.9496	63.9959	31.308	63.4583	31.5589	62.8848	31.6843	62.2934	31.7381	61.702	31.756	61.1106	31.7381	60.5192	31.7022	59.9278	31.6485	59.3364	31.5947	58.745	31.541	58.1716	31.4334	57.5802	31.3438	57.0425	31.1288	56.5228
Eliza_20151119_SA53707	57.5039	43.8465	56.6022	43.7338	52.3378	41.0286	52.0936	40.3711	52.2814	39.8075	59.0256	42.1182	58.7438	41.2728	55.4375	37.4405	54.7048	37.3278	54.2915	37.4593	58.8941	45.0864	58.3305	45.1052	57.767	45.0864	57.2409	44.9361	56.7337	44.7107	56.2265	44.4665	55.7381	44.1847	55.2684	43.8841	54.7988	43.5835	54.3479	43.2454	53.9346	42.8697	53.5025	42.5127	53.0705	42.1558	52.7323	41.7237	52.4505
Eliza_20160711_SA54701	48.7335	48.375	47.8844	48.375	43.7148	46.3751	43.6205	45.8468	43.6394	45.3185	49.8277	46.4883	49.5447	45.7902	45.9223	42.847	45.2808	42.8092	44.7525	42.9979	50.1674	49.3749	49.6768	49.507	49.1674	49.507	48.658	49.4315	48.1675	49.2995	47.6958	49.1108	47.243	48.8655	46.7713	48.6391	46.2996	48.4316	45.8468	48.1863	45.394	47.941	44.9601	47.6769	44.5261	47.4128	44.1488	47.0732	43.9035
Eliza_20161028_SA55295	58.348	34.6474	57.4182	34.8755	52.1904	34.1211	51.7518	33.472	51.6817	32.9633	59.1199	32.1563	58.4884	31.402	53.9798	28.9109	53.3307	29.1038	52.8571	29.4021	60.2076	35.1386	59.6813	35.3842	59.1375	35.5772	58.5761	35.6298	57.9972	35.6649	57.4358	35.6649	56.8569	35.6123	56.2955	35.5246	55.7166	35.4193	55.1552	35.2965	54.5938	35.1913	54.0324	35.0509	53.4711	34.9281	52.9623	34.6825	52.4887
Eliza_20150819_SA53309	36.6163	27.9375	36.2114	28.5009	32.2329	30.8422	31.5112	30.7366	31.0887	30.5781	35.7009	25.8779	34.9087	25.8427	30.631	26.9517	30.2789	27.5327	30.138	28.0432	38.2183	27.0926	38.0422	27.5679	37.7782	28.008	37.4437	28.3953	37.074	28.7649	36.6867	29.0818	36.2818	29.3811	35.8417	29.6627	35.4192	29.9444	34.9615	30.1733	34.5038	30.3845	34.0285	30.5958	33.5708	30.7894	33.0603	30.8774	32.5498
Eliza_20151119_SA53762	55.809	36.8816	55.103	37.2442	50.3903	37.5304	49.856	37.0724	49.856	36.6527	56.1334	34.7065	55.561	34.0769	51.0772	32.7985	50.5048	33.0656	50.1041	33.3709	57.3545	37.0915	56.9347	37.3586	56.4959	37.5876	56.0189	37.7402	55.5228	37.8356	55.0267	37.8929	54.5306	37.8929	54.0346	37.931	53.5385	37.912	53.0424	37.9501	52.5272	37.9692	52.0312	37.931	51.5351	37.931	51.0581	37.8166	50.6002
Eliza_20150818_SA53200	67.1161	31.4596	66.514	32.2442	61.733	34.4887	61.1126	34.288	60.6199	33.8865	66.4592	29.0326	65.5833	28.8501	60.3826	29.507	59.9447	29.9815	59.8534	30.4924	68.7767	31.1128	68.4482	31.5508	68.0833	31.9705	67.6636	32.3172	67.2074	32.6274	66.7329	32.9011	66.2402	33.1566	65.7658	33.4303	65.2731	33.6676	64.7439	33.85	64.233	34.069	63.7403	34.288	63.2111	34.4157	62.6636	34.5252	62.1162
Eliza_20170913_SA56500	67.4095	37.7979	66.4765	37.7451	61.9344	34.629	61.8288	33.9424	61.8464	33.3439	69.1877	35.7205	69.0644	34.9459	65.5258	30.6855	64.6808	30.5271	64.135	30.5623	68.994	39.1359	68.3954	39.1007	67.8145	39.0479	67.2335	38.8894	66.6877	38.6606	66.1596	38.3789	65.649	38.0796	65.1385	37.7627	64.6456	37.4282	64.1526	37.0937	63.6773	36.724	63.2548	36.3191	62.8499	35.879	62.4801	35.4037	62.1809
Eliza_20150211_SA51747	64.7533	19.2127	63.8268	19.1952	59.5961	16.6079	59.4213	16.1184	59.4912	15.6114	66.0295	17.3596	65.7498	16.3632	62.1485	12.8842	61.7115	12.8668	61.2045	12.9716	66.012	20.0344	65.4876	20.0519	64.9456	20.0693	64.4212	19.9994	63.9317	19.8246	63.4422	19.6148	62.9702	19.3875	62.4807	19.1603	62.0087	18.933	61.5541	18.6708	61.0996	18.3911	60.6625	18.0764	60.2605	17.7442	59.9283	17.3247	59.8059
Eliza_20160524_SA54364	65.047	39.7215	64.2807	40.2689	59.336	41.6191	58.5879	41.3089	58.2047	40.5973	64.828	37.1124	63.9887	36.8022	58.8798	36.638	58.1318	37.0759	57.8398	37.6962	67.0905	39.5208	66.7074	39.9405	66.2512	40.3054	65.8133	40.6521	65.3024	40.9075	64.7733	41.1082	64.2077	41.1812	63.642	41.3272	63.0947	41.4732	62.529	41.5826	61.9817	41.6921	61.416	41.8016	60.8504	41.8746	60.2848	41.8198	59.7374
Eliza_20160711_SA54735	67.457	43.3112	66.5163	43.5141	61.9601	42.8501	61.2038	42.2413	61.2223	41.6511	68.2686	41.0239	67.6415	40.3414	63.3436	38.2386	62.495	38.3123	61.9232	38.6997	69.357	43.8277	68.8958	44.0859	68.3978	44.252	67.8813	44.3073	67.3648	44.3073	66.8299	44.2704	66.3318	44.1413	65.8153	44.0306	65.2988	43.9384	64.7824	43.8277	64.2843	43.6801	63.7863	43.551	63.2698	43.4403	62.7717	43.2928	62.3106
Eliza_20150819_SA53308	67.706	39.7255	66.8515	40.0891	61.779	40.1982	61.3427	39.7437	60.9609	39.2164	68.2151	37.1983	67.6151	36.4893	62.6699	34.8712	62.0699	35.1439	61.5609	35.5075	69.6696	39.9437	69.1969	40.2527	68.6696	40.4709	68.1424	40.6527	67.5788	40.7618	67.0152	40.8163	66.4516	40.7618	65.8879	40.8527	65.3243	40.8345	64.7607	40.78	64.1971	40.7618	63.6335	40.7436	63.0699	40.7073	62.5426	40.5436	62.0336
Eliza_20151118_SA53618	55.4157	39.4346	54.743	39.98	50.0887	41.1618	49.5796	40.8709	49.1796	40.38	55.2521	37.162	54.3612	36.7074	49.7614	36.3984	49.2523	36.8711	48.9614	37.4347	57.3247	39.2346	56.9793	39.6346	56.5793	39.98	56.1247	40.2527	55.6339	40.4709	55.143	40.6527	54.6157	40.7436	54.1067	40.9072	53.5976	41.0527	53.0885	41.1618	52.5613	41.2345	52.034	41.2891	51.5068	41.3618	50.9795	41.3436	50.4523
Eliza_20150212_SA51857	60.7957	44.5674	59.8961	45.1383	54.6712	44.9653	54.204	44.5847	54.1175	44.1176	61.0725	42.2663	60.294	41.5051	55.3978	39.948	54.7923	40.2075	54.4808	40.4843	62.4912	44.9134	62.0414	45.2421	61.5224	45.4497	61.0033	45.6573	60.4497	45.7784	59.8961	45.813	59.3424	45.865	58.7715	45.8996	58.2179	45.8823	57.6642	45.8477	57.1106	45.7957	56.5397	45.7265	56.0033	45.6054	55.467	45.4324	54.948
Eliza_20150819_SA53322	69.3845	21.3903	69.1346	22.3009	65.4743	25.9076	64.8494	26.0326	64.2066	25.979	68.0097	19.4977	66.992	19.5155	62.7603	22.0688	62.5282	22.6223	62.3854	23.2294	70.9379	20.319	70.8129	20.8725	70.6344	21.3903	70.3844	21.8902	70.0452	22.3545	69.7238	22.8008	69.3131	23.1758	68.956	23.6043	68.5453	23.9971	68.1168	24.3542	67.6883	24.7292	67.2419	25.0506	66.7956	25.4077	66.3135	25.6755	65.76
Eliza_20151117_SA53555	73.7321	23.116	73.243	24.058	69.6923	26.5581	69.0582	26.5943	68.6234	26.5037	72.7901	21.2138	71.7212	21.1776	67.627	22.645	67.3915	23.2066	67.2104	23.6414	75.0365	22.4638	74.8734	22.8986	74.6742	23.3334	74.3662	23.6957	74.022	24.0218	73.6597	24.3298	73.2792	24.6015	72.8807	24.8733	72.5002	25.145	72.1198	25.4349	71.7212	25.6885	71.3408	25.9421	70.9241	26.1776	70.4894	26.3588	70.0183
Eliza_20170906_SA56295	27.4951	35.5492	26.6792	35.9658	22.305	35.6013	21.7322	35.2541	21.4718	34.8549	27.8422	33.6224	27.2868	33.067	23.1209	31.4353	22.496	31.5742	22.062	31.904	28.9705	36.0005	28.5539	36.2261	28.1026	36.3997	27.6339	36.4692	27.1653	36.5039	26.6966	36.5039	26.2106	36.4865	25.7419	36.4865	25.2732	36.4344	24.8046	36.3824	24.3186	36.3129	23.8499	36.2435	23.3986	36.122	22.9473	35.9484	22.548
Eliza_20150212_SA51807	40.876	44.7723	39.8934	44.824	35.5316	43.0138	35.1868	42.4276	35.0834	41.738	41.8587	43.0828	41.5139	42.1346	37.7039	39.2038	37.0315	39.1865	36.4626	39.3589	41.8932	45.6515	41.4105	45.686	40.9278	45.7205	40.445	45.6515	39.9623	45.5308	39.5141	45.3757	39.0658	45.186	38.6348	44.9619	38.1866	44.755	37.7384	44.5654	37.3074	44.3413	36.8764	44.1172	36.4454	43.893	36.0661	43.6	35.773
Eliza_20150818_SA53194	71.1522	10.4095	70.3308	10.8737	65.2065	11.2486	64.528	10.8916	64.2244	10.4095	71.4379	8.0526	70.7058	7.37411	65.7421	6.03499	64.8672	6.37423	64.4387	6.90989	72.9198	10.6059	72.4734	10.9094	71.9735	11.1415	71.4736	11.3201	70.9558	11.4808	70.4201	11.5522	69.8666	11.5879	69.331	11.6236	68.7953	11.6058	68.2418	11.6415	67.7062	11.6415	67.1527	11.6415	66.617	11.6593	66.0814	11.5879	65.5814
Eliza_20150212_SA51822	67.5675	23.7236	67.1882	24.4477	64.0331	27.2408	63.5158	27.2753	63.0848	27.0511	66.4296	22.034	65.6537	22.1892	61.9814	24.1202	61.8435	24.5857	61.9469	25.0167	68.7571	22.8098	68.6881	23.2753	68.5157	23.6891	68.2744	24.0857	67.9985	24.465	67.6882	24.8098	67.3261	25.0857	66.9468	25.3615	66.6365	25.7063	66.2916	26.0167	65.9296	26.2925	65.5503	26.5856	65.1882	26.8615	64.7744	27.0856	64.3262
Eliza_20151119_SA53735	72.7309	10.9663	72.3964	11.7284	68.3444	14.6837	67.6753	14.6466	67.1177	14.2934	71.783	8.95893	70.9652	8.82883	66.114	10.1485	65.7608	10.7061	65.798	11.2265	74.3666	10.037	74.2179	10.5574	73.9948	11.0593	73.6789	11.4868	73.3257	11.8957	72.9168	12.2488	72.4521	12.5462	72.006	12.8622	71.5785	13.1782	71.1324	13.4942	70.6678	13.773	70.2031	14.0332	69.7384	14.3306	69.2366	14.5164	68.6976
Eliza_20160524_SA54445	57.3002	46.4013	56.329	46.6171	50.304	44.7647	49.8904	43.9733	49.9264	43.3259	58.6131	43.9733	58.3433	42.9302	53.1816	39.1893	52.3184	39.1893	51.7249	39.6569	59.5843	47.2466	58.9368	47.4444	58.2714	47.5523	57.588	47.5883	56.9045	47.5523	56.2391	47.4984	55.5916	47.2646	54.9262	47.1207	54.2967	46.9049	53.6493	46.6711	53.0198	46.4193	52.3903	46.1495	51.7788	45.8797	51.2033	45.538	50.6817
Eliza_20150820_SA53365	66.4459	23.1605	65.928	23.5891	62.1602	25.4105	61.5352	25.3034	61.3567	25.0891	65.803	21.4105	65.0888	21.3927	61.1067	22.3748	60.7852	22.8391	60.6781	23.1962	67.7852	22.607	67.6066	23.0177	67.303	23.357	66.9816	23.6784	66.5888	23.9284	66.1959	24.1605	65.7852	24.3569	65.3745	24.5534	64.9638	24.7498	64.5531	24.9105	64.1245	25.1069	63.7138	25.2677	63.2852	25.4284	62.8209	25.4819	62.3745
Eliza_20151119_SA53700	63.9279	16.6069	63.0379	17.2696	58.0956	18.5383	57.2246	18.2354	56.8269	17.743	63.7007	14.0126	62.716	13.5582	57.4708	13.4256	56.7891	13.899	56.5429	14.4103	65.8405	16.4364	65.4807	16.872	65.0262	17.2318	64.5528	17.5537	64.0416	17.7998	63.4735	17.9135	62.9054	17.9324	62.3562	18.0839	61.8071	18.2354	61.239	18.3679	60.6709	18.4437	60.1029	18.5005	59.5348	18.5762	58.9667	18.5952	58.3986
Eliza_20170208_SA55773	61.0181	29.5808	60.5718	30.4912	56.9836	33.6153	56.3052	33.8295	55.8589	33.7046	59.8756	27.7063	58.8937	27.6885	54.5379	29.4558	54.2522	30.0449	54.1451	30.5805	62.3927	28.6525	62.2499	29.1523	62.0357	29.6343	61.7501	30.0806	61.4109	30.4734	61.036	30.8483	60.6611	31.2231	60.2862	31.5802	59.8756	31.9015	59.4829	32.2407	59.0723	32.5799	58.6438	32.8834	58.1975	33.1512	57.7155	33.3654	57.2157
Eliza_20160524_SA54435	57.6638	17.8881	57.3002	18.8698	53.9189	21.9602	53.2099	21.9966	52.6827	21.7057	56.5003	16.1066	55.555	16.0884	51.2466	17.979	50.9557	18.5244	50.9376	19.1243	59.0999	17.0337	58.9909	17.5246	58.8091	18.0154	58.5182	18.4335	58.191	18.8153	57.8456	19.197	57.4638	19.5424	57.0639	19.8696	56.7003	20.215	56.3185	20.5604	55.9368	20.8877	55.5187	21.1967	55.1005	21.4876	54.6461	21.6875	54.1552
Eliza_20141015_SA50707	57.1505	13.0579	56.9422	14.1474	53.6096	18.217	52.9207	18.4253	52.2477	18.217	55.5002	11.2154	54.3466	11.3916	49.9726	14.2916	49.7964	14.8684	49.7483	15.4612	58.4643	11.7601	58.4803	12.3209	58.3201	12.8657	58.1278	13.4104	57.8715	13.9231	57.567	14.4038	57.2306	14.8684	56.8941	15.3331	56.5256	15.7656	56.1731	16.2143	55.7886	16.6469	55.3881	17.0474	54.9555	17.4319	54.5068	17.7844	53.9781
Eliza_20151117_SA53567	52.3585	38.5069	51.3665	38.2183	47.1641	35.549	46.9838	34.8095	47.1641	34.07	53.9276	36.9197	53.8555	35.8916	50.8976	31.7794	49.9778	31.4728	49.4006	31.6893	53.6571	39.7874	53.116	39.8055	52.5749	39.7153	52.0339	39.571	51.5469	39.3185	51.078	39.0479	50.609	38.7594	50.1401	38.4708	49.7072	38.1281	49.2924	37.7674	48.8956	37.3886	48.4808	37.0459	48.0479	36.7033	47.6872	36.2884	47.3986
Eliza_20160301_SA54117	52.7076	18.0697	51.9739	18.5816	46.9403	18.9911	46.4114	18.5475	46.1213	18.0015	52.9294	15.6638	52.3493	15.0837	47.3498	13.9063	46.6844	14.2476	46.3431	14.7424	54.5504	18.1892	54.1409	18.5304	53.6973	18.8376	53.1854	19.0082	52.6564	19.1106	52.1275	19.1959	51.5985	19.2812	51.0525	19.2983	50.5235	19.3494	49.9775	19.4006	49.4486	19.4348	48.9026	19.4348	48.3736	19.4006	47.8447	19.3153	47.3498
Eliza_20160823_SA54928	34.1247	13.107	33.5354	14.0713	29.6069	16.8749	28.9462	16.8213	28.4998	16.5534	32.9462	10.8571	31.964	10.7499	27.3391	12.2856	26.9462	12.9999	26.8212	13.4999	35.7676	11.9999	35.6961	12.5535	35.464	13.0713	35.1783	13.5713	34.8212	13.9999	34.4104	14.3927	33.9283	14.6963	33.464	15.0177	32.9997	15.357	32.5712	15.732	32.1069	16.0356	31.6247	16.3392	31.1069	16.5892	30.589	16.7856	30.0176
Eliza_20150819_SA53317	64.3122	22.6888	63.5902	22.9777	58.4278	22.2376	58.0307	21.7322	57.9405	21.1185	64.9981	20.577	64.5468	19.9092	59.9079	17.5807	59.2942	17.707	58.7888	18.0319	66.0811	23.1581	65.6118	23.4289	65.0883	23.5913	64.5468	23.7177	64.0053	23.7538	63.4638	23.7357	62.9223	23.6274	62.3808	23.5553	61.8393	23.483	61.2978	23.3928	60.7743	23.2664	60.2509	23.104	59.7274	22.9415	59.2221	22.7069	58.7527
Eliza_20160524_SA54421	69.1853	33.5802	68.3251	33.8669	63.0211	32.7201	62.5731	32.1646	62.3581	31.5733	70.0633	31.1253	69.5078	30.3727	64.7951	27.8103	64.0783	27.9536	63.5587	28.2403	71.1922	34.064	70.6546	34.297	70.0991	34.4941	69.5078	34.5658	68.9344	34.6016	68.3431	34.5478	67.7697	34.4224	67.1783	34.3328	66.6049	34.2611	66.0315	34.1536	65.4581	34.0103	64.9026	33.8132	64.3471	33.5981	63.8275	33.3293	63.3974
Eliza_20161103_SA55455	63.9206	23.4394	63.4368	24.4787	58.8314	27.6506	58.025	27.6506	57.5053	27.3101	62.8275	21.2352	61.6269	21.2352	56.4659	22.9197	56.0717	23.6902	56.1075	24.192	65.9456	22.4	65.7664	23.0093	65.4259	23.5469	65.0675	24.0666	64.6374	24.5325	64.1536	24.9446	63.5802	25.2314	63.0784	25.6077	62.5408	25.9482	61.9853	26.2528	61.4298	26.5754	60.8922	26.8979	60.3366	27.2026	59.7453	27.4534	59.1181
Eliza_20150210_SA51568	50.7994	43.5519	49.9997	43.7018	44.6515	42.2523	44.3183	41.6525	44.2183	41.1193	52.0323	41.2693	51.7157	40.4696	47.034	37.1707	46.4009	37.2373	45.9177	37.6205	52.5821	44.2683	52.0323	44.4182	51.4492	44.4515	50.866	44.4849	50.2996	44.4182	49.7331	44.3516	49.1833	44.1683	48.6001	44.1183	48.0503	43.9517	47.5172	43.7518	46.984	43.5352	46.4342	43.3186	45.9177	43.0853	45.4012	42.8021	44.968
Eliza_20151117_SA53520	45.3146	33.5067	44.9742	34.3309	41.6235	37.5203	40.9247	37.5382	40.3155	37.3411	43.8991	31.5178	42.9674	31.7328	38.8104	33.5425	38.5775	34.2055	38.5954	34.8684	46.8197	32.1807	46.766	32.7183	46.5868	33.22	46.3718	33.7038	46.0672	34.1517	45.7088	34.5459	45.3146	34.9222	44.9563	35.2985	44.5621	35.6568	44.1679	36.0331	43.7558	36.3735	43.3436	36.714	42.8778	36.9828	42.4477	37.2874	41.9281
Eliza_20160705_SA54619	64.1633	39.6537	63.2214	39.4726	59.7795	36.4474	59.7252	35.8315	59.8701	35.2699	65.5401	38.3495	65.4133	37.498	62.7322	33.7664	62.1163	33.6214	61.5548	33.6758	65.214	40.6863	64.7068	40.7044	64.2177	40.6138	63.7648	40.4327	63.3119	40.2153	62.9134	39.9255	62.533	39.5813	62.1526	39.2733	61.7903	38.9291	61.4098	38.6031	61.0657	38.2408	60.7215	37.8785	60.3592	37.5343	60.0512	37.1358	59.8338
Eliza_20150210_SA51543	40.095	31.5645	39.9465	32.3565	37.158	35.3925	36.5805	35.4915	36.135	35.343	39.0225	30.195	38.181	30.3765	34.6995	32.307	34.452	32.8185	34.6005	33.297	41.2665	30.6075	41.316	31.053	41.184	31.482	40.986	31.8945	40.722	32.274	40.425	32.604	40.128	32.9505	39.831	33.297	39.5175	33.627	39.204	33.957	38.8905	34.254	38.544	34.5675	38.214	34.8645	37.851	35.1285	37.422
Eliza_20150819_SA53306	22.7581	54.8609	22.0168	54.9126	17.81	52.9126	17.4134	52.2747	17.4824	51.654	23.9477	53.1885	23.7064	52.3609	20.1547	49.1886	19.4134	49.1541	19.103	49.4299	24.3098	55.7574	23.8098	55.8436	23.3098	55.8781	22.7926	55.8091	22.3099	55.6712	21.8271	55.516	21.3444	55.3436	20.8961	55.1195	20.4478	54.8609	20.0168	54.6022	19.5685	54.3781	19.1375	54.1023	18.7065	53.8264	18.3272	53.4816	18.0168
Eliza_20150210_SA51582	52.4202	33.2859	51.5389	33.1164	48.0137	30.2691	47.8781	29.6251	47.8612	29.015	54.0472	31.8283	53.7591	30.8962	51.2677	27.2693	50.5559	27.0321	50.1491	26.9643	53.5557	34.3875	53.0811	34.3705	52.6066	34.2689	52.149	34.1163	51.7253	33.8791	51.3355	33.6248	50.9287	33.3537	50.5389	33.0825	50.183	32.7605	49.8102	32.4724	49.4204	32.1673	49.0645	31.8453	48.7594	31.4894	48.4543	31.1165	48.3018
Eliza_20150820_SA53402	71.1799	31.8855	70.68	32.5817	66.2346	34.7241	65.699	34.5456	65.2349	34.1885	70.6443	29.761	69.9123	29.511	65.0563	30.2965	64.6993	30.8321	64.5564	31.3856	72.8402	31.2249	72.6082	31.7069	72.2868	32.1175	71.894	32.4925	71.4834	32.8138	71.0549	33.1173	70.5551	33.3137	70.0909	33.5636	69.591	33.76	69.109	33.9743	68.6091	34.1528	68.1092	34.3492	67.6272	34.5634	67.1094	34.6705	66.5738
Eliza_20160524_SA54441	68.6515	7.41785	68.2697	8.30872	64.5244	12.9812	63.379	13.2721	62.6517	13.0358	66.7606	5.09068	65.7425	5.32703	60.27	8.07236	59.9791	8.92687	59.9428	9.61775	70.4696	5.67247	70.3605	6.32699	70.1605	6.96332	69.9241	7.58148	69.6332	8.18145	69.2332	8.72688	68.7787	9.19959	68.3242	9.69047	67.8333	10.145	67.4151	10.6722	66.9606	11.1631	66.4516	11.5813	65.9607	12.054	65.4698	12.4903	64.8516
Eliza_20150211_SA51765	36.3664	66.6199	35.6239	67.1553	31.2896	68.623	30.5989	68.364	30.2535	68.0532	35.9347	64.4614	35.0886	64.1161	30.5298	64.2715	29.9082	64.7377	29.701	65.273	37.9205	66.1364	37.6788	66.5681	37.2989	66.9135	36.919	67.2243	36.4873	67.4833	36.0383	67.7078	35.5548	67.846	35.054	67.9668	34.5705	68.105	34.087	68.2259	33.6208	68.3813	33.12	68.5022	32.6365	68.6058	32.1357	68.6576	31.635
Eliza_20150818_SA53237	60.4003	42.4113	59.6311	42.8484	55.4354	43.3204	54.9984	42.9358	54.8061	42.5162	60.4528	40.4708	59.7884	39.824	55.6802	38.9674	55.1207	39.2471	54.841	39.7191	61.9387	42.3414	61.6066	42.6736	61.222	42.9533	60.7849	43.1631	60.3479	43.3204	59.8758	43.3903	59.4038	43.4078	58.9318	43.4428	58.4598	43.5302	57.9878	43.6351	57.5158	43.67	57.0438	43.67	56.5718	43.6526	56.0997	43.5826	55.6452
Eliza_20150211_SA51716	40.3223	9.22876	40.0141	10.1533	35.4597	13.4579	34.7234	13.4408	34.107	12.9956	39.158	7.10563	38.1649	6.8488	32.7886	8.76646	32.4976	9.36573	32.3777	10.0164	41.9147	8.20144	41.8119	8.78359	41.5893	9.33149	41.2811	9.86227	40.9045	10.3246	40.4764	10.7184	40.0312	11.1122	39.5689	11.4889	39.0724	11.8313	38.6101	12.1909	38.0964	12.5162	37.5828	12.8073	37.0691	13.1155	36.5212	13.338	35.922
Eliza_20150210_SA51617	47.6533	6.44819	47.4201	7.26463	44.6708	10.6304	44.0377	10.7303	43.5045	10.6304	46.1704	4.9986	45.3873	5.14856	42.0049	7.83114	41.7883	8.36432	41.805	8.78087	48.7863	5.19854	48.803	5.68174	48.7197	6.16494	48.5864	6.64814	48.3365	7.06469	48.0865	7.48124	47.7533	7.8478	47.4367	8.21437	47.1368	8.59759	46.8202	8.98082	46.487	9.34738	46.1704	9.69728	45.8038	10.0472	45.3873	10.2971	44.9374
Eliza_20160826_SA54994	59.6199	17.9563	58.8813	18.396	53.781	18.2201	53.3062	17.7629	53.0072	17.2353	60.0244	15.5645	59.2682	14.9138	54.678	13.4013	54.168	13.5596	53.6931	13.9993	61.3786	18.185	60.939	18.5015	60.4465	18.7302	59.9365	18.8884	59.3913	18.9588	58.8637	19.0115	58.3185	19.0467	57.7733	19.0643	57.2457	19.0643	56.7005	19.0291	56.1553	18.9588	55.6277	18.8709	55.1001	18.8005	54.5725	18.6598	54.0976
Eliza_20170210_SA55842	64.9258	26.7862	64.0233	26.7862	59.8357	25.3241	59.547	24.6924	59.4748	24.1509	65.9186	25.0173	65.359	24.2592	61.8573	21.66	61.1895	21.6059	60.6841	21.8766	66.3337	27.5443	65.8645	27.6887	65.3771	27.7429	64.8898	27.7067	64.4024	27.6346	63.9331	27.5082	63.4638	27.3638	62.9945	27.1833	62.5252	27.075	62.074	26.8764	61.6407	26.6598	61.2075	26.4252	60.7743	26.2086	60.3772	25.9017	60.0523
Eliza_20150820_SA53429	60.771	42.2667	60.1253	43.06	54.4246	44.6466	53.8157	44.3514	53.4652	43.9086	60.2175	39.4255	59.2582	39.1488	53.5021	39.4071	53.0962	39.8498	52.9671	40.4218	62.8373	41.7316	62.5237	42.2851	62.0809	42.7648	61.5828	43.1522	61.0293	43.5027	60.4389	43.7426	59.7932	43.8533	59.2028	44.13	58.594	44.296	57.9668	44.4621	57.3395	44.6281	56.6938	44.7388	56.0665	44.8495	55.4208	44.8495	54.7751
Eliza_20170913_SA56494	67.6553	11.2409	67.1833	12.1325	63.5296	14.4576	62.8478	14.5101	62.4807	14.3003	66.7463	9.38783	65.7673	9.19553	61.694	10.4193	61.2744	10.7689	60.8898	11.2234	68.9315	10.4542	68.8441	10.9437	68.6693	11.3983	68.3721	11.8003	68.0225	12.15	67.6728	12.4821	67.2707	12.7619	66.8512	13.0241	66.4666	13.3213	66.0645	13.6185	65.6449	13.8807	65.2079	14.108	64.7708	14.3178	64.2813	14.4227	63.7918
Eliza_20150211_SA51681	38.5952	15.8559	38.0131	16.421	34.2974	18.3216	33.7666	18.1675	33.3899	17.8593	37.9617	13.9381	37.1227	13.8696	33.0303	14.6573	32.7905	15.1196	32.7734	15.5648	39.948	15.2737	39.7939	15.7018	39.5199	16.0785	39.1774	16.3696	38.8007	16.6436	38.4069	16.8833	37.9788	17.0545	37.5679	17.2429	37.1569	17.4655	36.7631	17.6881	36.335	17.8764	35.9069	18.0305	35.4789	18.1675	35.0337	18.2874	34.5713
Eliza_20151119_SA53732	43.4678	31.9176	43.1496	32.9846	40.3978	37.0843	39.8362	37.2528	39.2933	37.1779	41.6146	30.1954	40.6411	30.6446	36.8222	33.8458	36.841	34.4822	37.0094	34.969	44.5162	30.3638	44.591	30.9442	44.5349	31.5058	44.4226	32.0861	44.2354	32.629	43.992	33.1531	43.6925	33.6398	43.3742	34.1266	43.0747	34.6133	42.7565	35.1	42.4195	35.568	42.0451	36.0173	41.6894	36.4666	41.2589	36.8597	40.6973
20180905_SA71574	67.0216	61.306	66.9245	60.4323	67.8832	53.7945	68.7448	53.2241	69.2787	52.9935	70.1524	62.3011	70.8199	61.6822	74.0114	55.7846	73.8051	54.8381	73.3803	54.2313	66.5483	64.1577	66.1479	63.5146	65.8324	62.8229	65.7596	62.0705	65.8324	61.3182	65.9173	60.5658	66.1479	59.8377	66.1843	59.0853	66.2328	58.3208	66.342	57.5684	66.4755	56.8282	66.5726	56.0758	66.7546	55.3356	67.0944	54.6682	67.6162
UpperBarton_20131204_SA16130	42.8356	19.1206	42.0417	19.678	36.7041	20.1172	36.2481	19.7287	35.944	19.222	42.9707	16.5025	42.3626	15.9958	36.8731	14.8472	36.2819	15.1681	35.8934	15.6411	44.6598	19.1375	44.2713	19.5598	43.7815	19.8807	43.2747	20.1679	42.7342	20.3705	42.1599	20.5057	41.5856	20.5395	41.0113	20.6239	40.4371	20.7084	39.8628	20.759	39.2716	20.7253	38.6973	20.7421	38.123	20.7759	37.5487	20.6577	37.0757
UpperBarton_20140109_SA16202	61.7308	28.8846	60.7835	28.9019	56.3742	26.3527	55.9263	25.6293	56.0297	25.2676	63.2638	26.99	63.0226	26.1805	59.5778	22.5118	58.7683	22.3568	58.131	22.4945	63.4188	30.0731	62.8676	30.1592	62.3164	30.1248	61.7825	30.0042	61.2485	29.8492	60.749	29.6253	60.2496	29.3669	59.7501	29.1258	59.2678	28.8502	58.8027	28.5746	58.3205	28.299	57.8726	27.9546	57.4248	27.6617	56.9942	27.3	56.6497
UpperBarton_20140109_SA16205	54.7784	22.3628	54.2366	23.2056	49.752	26.0498	48.9694	26.0498	48.518	25.7338	53.6497	20.0302	52.7618	19.9249	47.5548	21.3094	47.1485	21.9113	46.983	22.408	56.3736	21.1739	56.2833	21.7759	56.0274	22.3177	55.7114	22.8293	55.3352	23.2959	54.8536	23.6721	54.3269	23.943	53.8152	24.274	53.3186	24.6051	52.8069	24.9211	52.2501	25.1619	51.7084	25.4178	51.1816	25.7187	50.6399	25.9746	50.0379
UpperBarton_20140317_SA17016	28.8887	56.1585	28.0793	56.3924	23.2765	55.1692	22.7908	54.5576	22.6649	54.1079	29.7701	54.1439	29.3924	53.4244	24.9673	50.8341	24.2298	50.942	23.8161	51.2658	30.5976	56.7342	30.1119	56.968	29.5903	57.0939	29.0506	57.1119	28.511	57.0939	27.9713	57.022	27.4677	56.8421	26.946	56.7162	26.4244	56.5363	25.9027	56.4643	25.3991	56.2485	24.8954	56.0506	24.3917	55.8887	23.9061	55.6369	23.4923
UpperBarton_20140317_SA17023	68.4373	24.8455	67.7377	25.4196	62.93	26.9803	62.051	26.6574	61.4949	26.3165	68.0785	22.2623	67.3968	21.8318	62.1766	21.7062	61.4052	22.2085	61.2617	22.7108	70.1774	24.2176	69.9083	24.702	69.5316	25.0967	69.101	25.4554	68.6167	25.7245	68.1144	25.9936	67.5762	26.1192	67.056	26.2627	66.5178	26.4241	65.9796	26.5856	65.4415	26.6932	64.9033	26.765	64.3472	26.8906	63.809	26.9623	63.2529
Eliza_20141013_SA50420	57.1699	35.8832	56.5137	36.6034	51.232	38.0599	50.4638	37.8198	49.9996	37.2916	56.9138	33.3864	56.0335	32.8423	50.8799	32.6182	50.1277	33.1944	49.8076	33.7065	58.9624	35.4351	58.5943	35.8832	58.1782	36.2833	57.698	36.6194	57.1859	36.8915	56.6417	37.0836	56.1135	37.3077	55.5694	37.5157	55.0092	37.6438	54.433	37.7558	53.8888	37.9158	53.3127	38.0119	52.7365	38.1079	52.1603	38.1399	51.5841
Eliza_20141013_SA50440	1.62404	38.3402	2.18131	37.4485	6.28919	34.8055	7.19674	34.7259	7.99284	34.8851	2.70674	40.5693	3.61429	40.6489	8.39089	39.4706	9.09146	38.8656	9.20292	38.1969	0.286596	39.4229	0.39805	38.8974	0.71649	38.4516	1.03493	38.0058	1.40114	37.6078	1.78326	37.2256	2.18131	36.8435	2.61121	36.5091	3.07295	36.2225	3.53468	35.936	3.99642	35.6653	4.47408	35.4105	4.96766	35.1876	5.47717	34.9966	6.01852
Eliza_20141014_SA50518	60.5999	31.5775	59.9216	32.24	54.5904	33.4545	53.991	32.9813	53.6913	32.4608	60.5052	28.975	59.7481	28.4703	54.4484	27.7605	53.7702	28.3283	53.5967	28.9435	62.398	31.2463	62.0194	31.6722	61.5778	32.0665	61.1046	32.3977	60.5683	32.6343	60.0478	32.8709	59.48	32.9656	58.9279	33.1233	58.3443	33.1864	57.7765	33.2968	57.1929	33.3599	56.6251	33.4545	56.0415	33.5019	55.4736	33.5176	54.89
Eliza_20141014_SA50520	7.78289	4.84268	8.56903	5.31437	12.0438	8.96211	11.9966	9.65392	11.808	10.2514	5.81751	6.14769	5.78606	7.07535	7.6571	11.9023	8.30174	12.1224	8.8206	12.2168	6.82378	3.39617	7.34264	3.5534	7.84578	3.74207	8.31747	4.04081	8.72626	4.38672	9.13506	4.76407	9.51242	5.15714	9.88977	5.5345	10.2671	5.92757	10.613	6.35209	10.9432	6.77661	11.2734	7.21686	11.5879	7.6571	11.8394	8.14451	11.9809
Eliza_20141015_SA50605	10.5294	37.0865	10.6696	36.2921	12.71	31.9464	13.3954	31.6349	13.9561	31.6349	12.196	38.3481	12.9748	38.1456	16.5261	34.6254	16.5417	34.0024	16.2458	33.4261	9.54809	38.4416	9.48578	37.9276	9.48578	37.4136	9.59482	36.9151	9.75058	36.4323	9.95306	35.965	10.249	35.5289	10.4671	35.0616	10.6696	34.5943	10.9344	34.1582	11.2147	33.722	11.4951	33.3015	11.791	32.8809	12.1181	32.476	12.5075
Eliza_20141015_SA50619	19.8576	37.0402	19.7946	36.1276	21.3524	31.47	21.8244	31.1396	22.5325	30.935	22.0447	38.1574	22.7371	37.6067	25.8526	33.9247	25.8683	33.2009	25.6795	32.5242	19.2596	38.8812	19.0551	38.3619	18.9607	37.8269	18.9449	37.2762	19.0079	36.7255	19.118	36.1905	19.2754	35.6555	19.3855	35.1205	19.5586	34.5855	19.7946	34.0977	20.0307	33.5942	20.2824	33.1064	20.5499	32.6187	20.8174	32.1309	21.1636
Eliza_20160705_SA54594	49.6459	27.3415	49.1812	28.2894	44.7203	30.4269	44.0512	30.3526	43.5679	30.0552	48.8838	25.2226	47.7872	24.9623	43.0475	25.966	42.62	26.4865	42.4341	27.0441	51.17	26.8768	51.0027	27.3787	50.7053	27.8247	50.315	28.1779	49.8875	28.4753	49.4414	28.7727	48.9767	29.0329	48.5121	29.2559	48.0474	29.5162	47.5641	29.7392	47.0623	29.9251	46.579	30.1295	46.0958	30.3712	45.5753	30.4641	45.0549
Eliza_20160708_SA54644	63.0406	19.43	62.6847	20.4264	59.6243	24.0561	58.8592	24.1095	58.361	23.9494	61.2791	17.7752	60.4606	17.9531	56.4038	20.5331	56.2081	21.1915	56.1725	21.6897	64.3039	18.1489	64.2861	18.6826	64.1794	19.2164	64.0192	19.7324	63.7701	20.2128	63.4498	20.6577	63.1118	21.0669	62.7737	21.4939	62.4178	21.921	62.062	22.3302	61.6705	22.7039	61.2613	23.0419	60.8343	23.38	60.3894	23.6825	59.8734
Eliza_20150820_SA53416	72.696	25.4181	72.1486	26.1844	68.1708	28.885	67.5686	28.885	66.9482	28.7208	71.7655	23.1737	70.8531	22.9912	66.2001	24.451	65.8534	24.8707	65.8169	25.4728	73.9551	24.6882	73.6996	25.1261	73.4077	25.5276	73.134	25.9472	72.769	26.2939	72.3858	26.6224	71.9844	26.9326	71.5647	27.2063	71.1268	27.4617	70.7071	27.7354	70.2692	27.9909	69.8495	28.2646	69.3933	28.4836	68.9189	28.666	68.4262
Eliza_20160524_SA54400	60.1781	23.1605	59.4817	23.7498	54.5353	23.8034	53.9639	23.357	53.7674	22.8391	60.5174	20.9641	59.7495	20.3034	55.3567	18.8391	54.7138	18.9106	54.2674	19.4463	62.0531	23.3212	61.6424	23.6784	61.1781	23.9462	60.6781	24.1427	60.1424	24.2498	59.6067	24.3212	59.071	24.3569	58.5352	24.3927	57.9995	24.4105	57.4638	24.4284	56.9281	24.4105	56.3924	24.3569	55.8567	24.2677	55.3388	24.1248	54.8567
UpperBarton_20150213_SA51881	37.9065	56.5397	37.076	56.8165	32.0934	55.6746	31.6262	55.2767	31.4532	54.8096	38.7542	54.377	38.2698	53.5985	33.737	51.1764	33.1833	51.2629	32.6124	51.4705	39.5501	57.0068	39.0484	57.2144	38.5293	57.3355	37.993	57.3874	37.4567	57.3528	36.9203	57.2836	36.384	57.2317	35.8477	57.1452	35.3113	57.0414	34.7923	56.9203	34.2733	56.7819	33.7543	56.6089	33.2525	56.4359	32.7854	56.1763	32.3529
Eliza_20160301_SA54064	38.4214	57.4917	37.4564	57.3689	33.0003	55.6847	32.702	55.1759	32.6669	54.6496	39.5968	55.6145	39.1758	54.8075	35.474	51.6846	34.8424	51.6846	34.4038	51.9302	40.0003	58.4742	39.474	58.5794	38.9301	58.597	38.3863	58.6145	37.8775	58.4566	37.3687	58.2461	36.8599	58.0706	36.3512	57.8952	35.8424	57.6847	35.3336	57.4917	34.8599	57.2285	34.4038	56.9303	33.9476	56.632	33.5441	56.2987	33.2459
Eliza_20160524_SA54438	43.2395	43.3136	42.2581	43.5914	37.0916	42.2951	36.5916	41.7951	36.4805	41.2211	44.2951	40.9989	43.7395	40.073	39.1841	37.4804	38.3878	37.6471	37.7952	38.0915	45.0358	43.758	44.5173	43.9988	43.9432	44.0728	43.3877	44.1099	42.8136	44.1469	42.2396	44.0728	41.684	43.9988	41.11	43.8877	40.5729	43.721	40.0174	43.5729	39.4804	43.3877	38.9434	43.2025	38.4063	43.0173	37.8693	42.7951	37.4064
Eliza_20150820_SA53381	35.1218	23.5963	34.7401	24.2326	30.977	27.014	30.3771	26.8686	29.9953	26.5595	34.1947	21.7966	33.3039	21.7421	29.2137	23.0146	28.741	23.5418	28.7774	24.0145	36.4671	22.9055	36.358	23.3782	36.1035	23.7963	35.8308	24.1781	35.4672	24.5235	35.1036	24.8507	34.7401	25.1597	34.3401	25.4324	33.9402	25.7051	33.5221	25.9596	33.1221	26.2141	32.6858	26.4504	32.2495	26.6686	31.7951	26.8322	31.3224
Eliza_20160301_SA54083	55.7229	29.5511	54.7574	29.5683	50.5161	27.1029	50.2058	26.4132	50.1886	25.6891	57.1884	27.7753	56.947	26.8787	53.5161	23.2064	52.7575	23.0685	52.1195	23.3443	57.378	30.6717	56.8436	30.7579	56.2919	30.7752	55.7746	30.6717	55.2402	30.5166	54.7402	30.3097	54.2574	30.0683	53.7747	29.8097	53.2919	29.5856	52.8092	29.3269	52.3609	29.0166	51.9299	28.689	51.4989	28.3614	51.0851	28.0166	50.8092
Eliza_20160524_SA54448	46.9591	18.6096	46.4592	19.5725	42.6632	22.9981	41.904	23.0722	41.3485	22.887	45.6444	16.4986	44.7	16.5542	39.9227	18.6466	39.6079	19.2947	39.7375	19.6651	48.5701	17.5171	48.496	18.0911	48.2923	18.6281	47.9961	19.1281	47.6442	19.591	47.2369	19.9984	46.811	20.3872	46.3666	20.7761	45.9592	21.1649	45.5333	21.5723	45.0704	21.9056	44.6075	22.2389	44.126	22.5722	43.589	22.7759	43.015
Eliza_20160705_SA54615	60.1648	33.4981	59.1208	33.9011	54.1391	33.2417	53.608	32.8388	53.2783	32.326	60.7875	31.2088	60.1648	30.348	55.4029	28.608	54.7252	28.7729	54.3223	29.1575	61.7948	33.7545	61.3003	33.9926	60.7875	34.1758	60.2563	34.2674	59.7069	34.3406	59.1574	34.3589	58.6263	34.2674	58.0769	34.249	57.5457	34.1758	56.9963	34.1025	56.4651	34.011	55.9157	33.9011	55.4029	33.7729	54.8717	33.608	54.4139
Eliza_20160301_SA54093	34.3669	56.3283	33.5478	56.3795	29.1965	54.5877	28.9747	54.0246	28.9405	53.4786	35.5102	54.5195	35.203	53.7175	31.7732	50.6801	31.1418	50.5948	30.5275	50.8678	35.5784	57.1303	35.1006	57.2327	34.6058	57.2838	34.1109	57.2156	33.6331	57.0961	33.1554	56.9596	32.6776	56.8231	32.2339	56.6354	31.7732	56.4477	31.3295	56.2259	30.9029	55.9699	30.4763	55.714	30.0497	55.458	29.6743	55.1508	29.3671
Eliza_20150820_SA53368	56.3031	28.8967	55.4852	29.0421	51.0326	27.788	50.5964	27.3519	50.4874	26.8248	57.2299	26.9339	56.6665	26.2796	52.9227	23.6262	52.2503	23.6625	51.7596	23.8988	57.757	29.4964	57.2844	29.6418	56.7938	29.66	56.3031	29.6418	55.8124	29.6054	55.3398	29.5328	54.8491	29.4419	54.3766	29.3147	53.9041	29.2056	53.4316	29.0602	52.9772	28.8785	52.5047	28.7149	52.0503	28.5332	51.6323	28.2969	51.2689
Eliza_20151118_SA53630	44.7169	33.6553	44.0832	34.3071	38.9417	35.1761	38.2719	34.814	37.9279	34.47	44.735	31.0846	43.866	30.632	38.7969	29.9621	38.2538	30.2337	37.8736	30.7587	46.7626	33.4381	46.3824	33.8726	45.9117	34.2166	45.4048	34.47	44.8617	34.6873	44.3186	34.8502	43.7574	34.995	43.1961	35.1037	42.6168	35.2123	42.0556	35.3028	41.4763	35.3752	40.915	35.4476	40.3357	35.4838	39.7564	35.4114	39.2133
Eliza_20170913_SA56495	67.2042	33.0238	66.3323	33.0772	61.3681	31.9918	60.9232	31.3691	60.8699	30.942	68.165	30.3904	67.8091	29.7855	63.2897	26.8852	62.5958	27.0098	62.2221	27.3123	68.8945	33.5754	68.3785	33.7711	67.8269	33.8245	67.2753	33.8779	66.7237	33.8601	66.1722	33.8067	65.6206	33.7177	65.0868	33.5754	64.553	33.433	64.0192	33.3085	63.4854	33.1662	62.9694	32.9704	62.4356	32.7925	61.9552	32.5256	61.5816
Eliza_20161103_SA55526	38.8642	70.2108	37.9067	70.2463	33.1374	67.5158	32.8537	66.913	32.8537	66.3457	40.5308	68.3137	40.5308	67.3208	36.7188	63.1011	35.9919	63.1365	35.46	63.3316	40.2294	71.2391	39.662	71.2214	39.0947	71.1682	38.545	71.0973	37.9954	70.9555	37.4635	70.7604	36.9671	70.4945	36.4529	70.2463	35.9564	69.9803	35.46	69.6966	34.9813	69.4129	34.5026	69.1115	34.0416	68.7747	33.6515	68.3846	33.4033
Eliza_20151118_SA53615	46.4202	61.2909	45.8113	61.9367	40.2948	62.9329	39.6675	62.6746	39.2431	62.2687	46.4755	58.8002	45.7375	58.0068	40.221	57.1765	39.5014	57.564	38.9479	58.1175	48.4312	61.1249	48.0254	61.5492	47.5457	61.8813	47.029	62.1765	46.4755	62.3979	45.922	62.5639	45.3317	62.6193	44.7781	62.8222	44.1878	62.9145	43.6158	63.0436	43.0254	63.0806	42.4534	63.1359	41.8631	63.1544	41.2726	63.1728	40.7007
Eliza_20160829_SA55148	49.3456	36.9961	48.3107	37.3118	43.1358	36.8557	42.7323	36.2944	42.6271	35.7681	49.9772	34.7156	49.3632	33.8736	44.4865	31.8563	43.8199	32.0843	43.3638	32.5229	50.9595	37.5223	50.4508	37.7328	49.9245	37.8907	49.3807	37.9609	48.8369	37.996	48.2931	37.996	47.7493	37.9433	47.2055	37.8907	46.6617	37.8206	46.1179	37.803	45.5741	37.7328	45.0303	37.6276	44.5041	37.5048	43.9603	37.3645	43.4866
Eliza_20170208_SA55759	66.8825	25.2855	66.0552	25.6452	60.6241	25.897	60.0666	25.4474	59.8508	24.9438	67.2602	22.9116	66.4689	22.1743	61.2895	20.7176	60.678	21.0413	60.3363	21.5808	68.9147	25.3574	68.4291	25.6991	67.9076	25.9689	67.3681	26.1667	66.7926	26.3106	66.2171	26.3645	65.6236	26.3645	65.0301	26.4005	64.4547	26.4185	63.8612	26.4365	63.2857	26.4545	62.6922	26.4545	62.0988	26.4545	61.5233	26.3286	61.0017
Eliza_20160524_SA54442	61.1063	8.92687	60.2518	9.70865	55.2339	11.454	54.6339	11.1086	54.2521	10.7268	60.5973	6.49062	59.5246	6.2179	54.2521	6.45425	53.743	6.92696	53.543	7.29058	63.1244	8.54507	62.779	9.03596	62.3608	9.45412	61.8699	9.81774	61.3609	10.145	60.8336	10.4359	60.2518	10.545	59.7064	10.7995	59.1428	11.0359	58.5974	11.2722	58.0156	11.4358	57.4338	11.5813	56.852	11.6904	56.252	11.654	55.652
Eliza_20160524_SA54440	66.2828	14.5101	65.6306	15.0536	60.4679	17.0281	59.852	16.7564	59.3447	16.3216	65.8843	11.9016	65.0147	11.6117	59.4534	11.6661	58.9281	12.0465	58.4752	12.6443	68.1124	14.184	67.7682	14.655	67.3516	15.0355	66.8987	15.3796	66.3734	15.6332	65.8661	15.905	65.3227	16.1042	64.7974	16.3397	64.272	16.5571	63.7105	16.7383	63.167	16.9013	62.6054	17.0281	62.0439	17.1549	61.4823	17.1911	60.9026
Eliza_20161028_SA55299	51.7968	40.3763	51.0594	40.9159	45.0704	42.1209	44.5488	41.7432	44.2431	41.4015	51.6349	37.4448	50.7177	36.8333	44.6927	36.3117	44.1532	36.7254	43.8474	37.3728	54.2787	40.0706	53.8111	40.5742	53.2716	40.9878	52.696	41.3475	52.1025	41.6712	51.4551	41.9051	50.7896	42.0489	50.1422	42.2108	49.4767	42.3727	48.8113	42.4986	48.1279	42.5885	47.4444	42.6604	46.779	42.6784	46.0956	42.6424	45.4661
Eliza_20171117_SA56898	59.6185	43.8675	58.8116	43.9202	54.8125	41.7627	54.6196	41.2365	54.7774	40.6226	60.9164	42.2539	60.7059	41.5347	57.5312	38.2197	56.8998	38.1495	56.4437	38.3424	60.8112	44.9199	60.3376	44.955	59.8465	44.9375	59.3729	44.8673	58.9169	44.7095	58.4784	44.5165	58.0399	44.3236	57.6014	44.1131	57.1629	43.9026	56.7594	43.6395	56.3736	43.3589	55.9701	43.0782	55.5843	42.8151	55.2335	42.4819	55.023
Eliza_20141013_SA50453	61.973	27.2167	61.6675	27.4417	57.2627	29.8692	56.8287	29.5959	56.5393	29.2101	61.6193	25.2875	61.2013	25.3519	56.1052	25.5126	55.9123	26.011	55.7837	26.4772	63.7574	26.7665	63.4841	27.2006	63.0501	27.4578	62.616	27.7311	62.182	28.0044	61.7318	28.2455	61.3139	28.551	60.8798	28.8243	60.4458	29.0976	59.9796	29.3226	59.5294	29.5638	59.0471	29.7567	58.5649	29.9335	58.0665	29.9978	57.5521
Eliza_20141015_SA50625	41.1416	34.6687	40.8282	34.5276	36.4711	32.0983	36.4084	31.5341	36.5965	30.9855	42.5835	33.3365	42.3641	33.023	39.6527	28.7913	39.0414	28.854	38.5713	28.9794	42.4268	36.0166	41.9253	36.0166	41.4864	35.7815	41.0476	35.515	40.6087	35.2799	40.1699	35.0135	39.7154	34.7941	39.2765	34.5746	38.8377	34.3239	38.3989	34.0731	37.96	33.8223	37.5368	33.5402	37.1607	33.2111	36.8316	32.8349	36.5808
20180905_SA71516	8.1279	10.6894	8.7067	10.4062	18.1646	8.66976	18.7927	9.08847	19.7409	10.0614	7.7215	14.975	8.18947	15.3568	16.9454	18.4356	17.7952	18.0045	19.0636	17.1425	5.40628	10.3077	6.20676	9.82737	7.03186	9.40866	7.91854	9.1131	8.84217	9.00226	9.7658	8.87912	10.6771	8.71902	11.5268	8.33726	12.4012	8.00475	13.3002	7.78308	14.2238	7.68456	15.1598	7.69688	16.0834	7.68456	16.9824	7.91854	17.7582
20180905_SA71531	32.3657	44.2003	32.6212	43.6895	37.2918	38.6054	38.3621	38.4108	39.2743	38.6175	34.5308	47.1073	35.0416	46.9857	41.3299	43.8233	41.7556	42.7894	41.5853	42.0353	29.9453	45.964	30.0669	45.2342	30.371	44.5652	30.7359	43.9206	31.2103	43.3489	31.7333	42.8259	32.3171	42.3759	32.9496	41.9867	33.3874	41.3907	33.8861	40.8555	34.397	40.3203	34.9565	39.8338	35.4795	39.2987	36.1241	38.9459	36.8539
20180905_SA71532	66.3236	54.1343	65.5937	54.0856	58.4772	51.2755	57.8202	50.3023	57.7594	49.5602	68.0875	50.7889	67.6739	50.2415	61.9928	45.3146	60.898	45.12	60.1073	45.3633	68.7687	55.5576	67.9659	55.6792	67.163	55.6792	66.3601	55.5819	65.5937	55.3507	64.8151	55.1196	64.0852	54.7668	63.3067	54.5479	62.5403	54.3289	61.8104	53.9761	61.1048	53.5868	60.3992	53.1854	59.7058	52.7718	59.0976	52.2487	58.7205
20180905_SA71538	15.2122	40.4806	15.5162	40.0672	20.8544	34.5587	21.9731	34.583	22.6176	34.9843	17.3158	43.5693	17.8995	43.3626	24.9888	40.2982	25.3779	39.2768	25.3171	38.4742	12.9747	41.9763	13.2666	41.271	13.6314	40.6022	14.0448	39.9578	14.592	39.4349	15.2365	39.0214	15.8931	38.6323	16.4403	38.0851	16.8902	37.465	17.3888	36.9056	17.8874	36.3098	18.4346	35.7869	18.9939	35.2762	19.6506	34.8749	20.4045
20180905_SA71563	42.6022	36.478	43.5844	36.4053	51.1759	35.1319	52.0491	35.8232	52.3038	36.6478	42.9296	40.1646	43.7906	40.395	51.0183	42.0322	51.8914	41.3409	52.1218	40.5406	40.5163	36.2112	41.1954	35.8717	41.8988	35.617	42.6264	35.3987	43.3662	35.2774	44.1059	35.144	44.8456	34.9743	45.5733	34.8166	46.3251	34.7075	47.0649	34.5983	47.8168	34.4771	48.5565	34.38	49.3084	34.3437	50.0481	34.4892	50.6666
20180905_SA71564	44.7741	7.12426	44.3586	7.55196	39.2262	10.998	38.4441	10.888	37.9187	10.5459	43.3688	4.0937	42.9044	4.0937	36.8311	5.14462	36.1712	5.78006	35.9879	6.45216	46.8637	6.63546	46.3871	7.0265	45.9472	7.47864	45.4584	7.85746	44.9452	8.21184	44.4197	8.54178	43.9187	8.9206	43.4543	9.33608	42.9533	9.70268	42.4278	10.0448	41.8902	10.3626	41.328	10.6314	40.7537	10.8758	40.1427	10.9858	39.5195
20180905_SA71580	44.3523	23.3986	44.5968	23.1053	48.9856	20.3791	49.7069	20.4035	50.367	20.7581	45.2203	25.8559	45.6726	25.807	50.6726	25.5136	51.2472	25.0246	51.565	24.4256	42.5919	23.9121	42.8853	23.4964	43.2765	23.1419	43.6677	22.8241	44.0956	22.5307	44.5357	22.2617	45.0002	22.0539	45.4159	21.736	45.8315	21.4427	46.2839	21.1981	46.7362	20.9536	47.2129	20.7458	47.6897	20.5502	48.1787	20.3913	48.6922
20180905_SA71582	41.6215	30.329	41.2069	30.7314	36.7435	33.646	35.9996	33.5119	35.4021	33.2192	40.7679	27.9631	40.2069	27.829	34.9997	28.7192	34.4997	29.2436	34.3289	29.8412	43.3166	29.6948	43.0362	30.1582	42.6703	30.5363	42.2679	30.9021	41.8289	31.2192	41.3898	31.5119	40.8898	31.7192	40.4264	31.9875	40.0118	32.3289	39.5484	32.6094	39.085	32.8777	38.6216	33.146	38.146	33.4021	37.6582	33.6216	37.1216
20180905_SA71616	60.387	29.4071	59.814	29.4193	54.0959	27.6515	53.4375	26.9321	53.2425	26.1031	61.9719	26.9931	61.7159	26.4079	57.912	21.97	56.7294	21.7871	55.9735	21.7749	61.911	30.797	61.338	30.7238	60.7527	30.7116	60.1797	30.6263	59.6067	30.5166	59.0702	30.2971	58.5704	30.0045	57.9973	29.9314	57.4365	29.7851	56.8879	29.5656	56.3636	29.334	55.8272	29.1023	55.3151	28.8341	54.8152	28.5293	54.4251
20180905_SA71618	27.0784	11.2348	27.384	10.9291	32.2495	8.2641	33.0564	8.30077	33.6432	8.63085	27.8241	14.0587	28.2398	14.1688	33.8633	13.7776	34.5234	13.1663	34.8046	12.3839	24.9757	11.5893	25.3913	11.2348	25.7825	10.8436	26.2471	10.538	26.7483	10.3057	27.2617	10.0978	27.7874	9.9267	28.2398	9.62107	28.7165	9.3399	29.2177	9.10763	29.7067	8.8509	30.208	8.61862	30.7214	8.4108	31.2471	8.23965	31.7972
20180905_SA71622	41.9864	21.9766	42.4872	22.001	47.2637	24.1022	47.5447	24.6885	47.5935	25.3482	40.4716	23.9922	40.7281	24.5542	44.4052	28.3045	45.0893	28.3289	45.6756	28.109	40.7892	20.8894	41.2901	20.9749	41.8032	21.0482	42.2918	21.1703	42.7682	21.3658	43.2446	21.5735	43.6966	21.7933	44.2097	21.8666	44.6861	22.0499	45.1381	22.2942	45.6023	22.5141	46.0665	22.7095	46.5185	22.9539	46.9339	23.2593	47.0805
20180905_SA71626	3.93899	11.9755	4.36581	11.7072	10.695	10.6828	11.317	11.4389	11.5853	12.2438	3.4146	15.634	3.80484	15.9876	10.3901	17.8535	11.1218	17.1706	11.6706	16.2437	1.7073	12.1462	2.25608	11.817	2.84144	11.5365	3.43899	11.3048	4.07313	11.1462	4.70727	11.0365	5.32921	10.9023	5.90238	10.6097	6.52433	10.4389	7.17066	10.3414	7.8048	10.2194	8.43894	10.134	9.08527	10.0731	9.71941	10.1584	10.2926
20180905_SA71628	36.0728	48.2922	35.646	47.902	31.8533	41.8045	31.9387	40.8045	32.1948	40.0728	39.6581	46.8776	39.6459	46.3654	37.8655	39.0362	37.3289	38.646	36.646	38.2435	36.9143	51.2068	36.2801	50.7556	35.646	50.3166	35.1704	49.7068	34.8411	49.0117	34.5119	48.3044	34.2679	47.5727	33.8899	46.902	33.3655	46.3288	32.9387	45.6825	32.4997	45.0483	32.146	44.3654	31.8533	43.6459	31.707	42.8898	31.8655
20180905_SA71631	29.3156	30.2324	29.7679	29.8657	36.895	26.6749	37.6775	27.0295	38.032	27.4696	30.0368	33.9366	30.5136	34.0833	38.4232	34.1689	39.0466	33.5821	39.4256	32.9586	26.785	30.4036	27.3473	29.8779	27.9586	29.4256	28.6432	29.0833	29.3278	28.741	30.0613	28.5087	30.7948	28.2887	31.4305	27.8608	32.0906	27.4818	32.7997	27.2006	33.4965	26.895	34.2056	26.5894	34.9391	26.3816	35.697	26.3327	36.4305
20180905_SA71633	85.9067	20.3152	85.358	20.4615	76.9685	21.7175	76.1149	21.0225	75.3955	20.3518	85.9555	15.6937	85.5287	15.4376	77.5416	12.8891	76.3954	13.6329	75.7979	14.4011	88.5162	19.9982	87.87	20.5469	87.1505	20.9859	86.3579	21.2907	85.5165	21.3639	84.6751	21.4736	83.8216	21.5102	83.0411	21.8273	82.2241	22.0589	81.3949	22.1687	80.5536	22.315	79.7122	22.376	78.8586	22.4004	78.0294	22.254	77.2612
20180905_SA71634	82.9152	62.4813	82.4165	62.2867	73.2699	59.2216	72.8077	57.8594	72.9537	56.8377	85.3113	59.0027	85.0072	58.4797	78.2203	51.3765	76.858	51.3643	75.9823	52.0333	85.8708	64.5977	84.8977	64.7072	83.9369	64.8166	82.976	64.622	82.0881	64.2206	81.2367	63.7584	80.4461	63.1868	79.4974	62.9314	78.5608	62.6881	77.6486	62.3354	76.7485	61.9705	75.8485	61.5813	75.0092	61.0947	74.2186	60.5231	73.6835
20180905_SA71649	89.4503	18.012	88.9503	18.2681	79.7065	20.3535	78.9626	19.7193	78.2309	18.8047	89.4015	13.9755	88.9016	13.8291	79.3894	11.9633	78.6943	12.6706	77.987	13.6218	92.3283	18.573	91.5235	18.9754	90.7308	19.4266	89.865	19.6827	88.9625	19.7681	88.0601	19.8778	87.1577	19.9632	86.2918	20.2193	85.4138	20.4388	84.5479	20.7071	83.6699	20.9144	82.7675	21.0486	81.865	21.1217	80.9626	21.073	80.109
20180905_SA71654	13.535	13.5597	13.9804	13.3741	20.7478	12.7184	21.1932	13.2628	21.3541	13.6834	12.7803	16.863	13.0277	17.1105	19.4983	19.5478	20.2282	19.0776	20.3519	18.5085	11.7287	13.003	12.3596	12.8793	12.9659	12.6813	13.5968	12.5452	14.2278	12.4957	14.8711	12.4833	15.5021	12.5823	16.1331	12.471	16.7641	12.3596	17.395	12.273	18.0384	12.2607	18.6817	12.2112	19.3127	12.1617	19.9437	12.2854	20.5004
20180905_SA71664	95.8771	10.5853	95.3771	11.0731	89.4747	14.1096	88.4381	13.7682	87.8406	13.0974	95.4503	7.5487	94.6454	7.48773	87.7918	7.0731	87.0845	7.95114	86.8772	8.75601	98.2795	9.89015	97.9015	10.4755	97.4381	10.9999	96.8893	11.4267	96.2917	11.7804	95.6332	12.0121	94.9625	12.1828	94.3527	12.5243	93.8161	12.9633	93.2186	13.3291	92.5966	13.634	91.9625	13.9145	91.2918	14.134	90.6089	14.2438	89.9137
20180905_SA71667	83.0224	18.4953	82.5612	18.7137	75.3767	20.7768	74.515	20.3885	74.1267	19.7453	82.7311	14.5147	82.3549	14.2477	74.7942	13.0462	73.9446	13.6651	73.8597	14.3205	85.5588	18.3739	85.0005	18.8715	84.4059	19.3326	83.7505	19.6846	83.0345	19.903	82.3185	20.1336	81.6146	20.3642	80.9471	20.704	80.2432	20.9589	79.5151	21.1288	78.7748	21.2744	78.0345	21.3472	77.282	21.3594	76.5418	21.238	75.8621
20180905_SA71674	85.401	23.8594	84.9763	24.3691	79.7335	27.1482	78.969	26.9541	78.4471	26.4808	84.5758	21.2137	84.0297	21.0681	77.8646	21.6628	77.4277	22.1361	77.1728	22.7307	87.5006	23.204	87.2578	23.7866	86.8209	24.2477	86.3355	24.6482	85.8015	24.9759	85.2433	25.2793	84.6486	25.4856	84.1146	25.8254	83.5928	26.1774	83.0345	26.4808	82.4641	26.7477	81.8695	26.9662	81.2627	27.1604	80.6437	27.2332	80.0126
20180905_SA71677	88.702	43.7624	88.4229	43.5561	83.4714	38.7381	83.5564	37.6459	83.8234	36.9663	91.5297	42.2697	91.5783	41.9177	89.9035	35.0973	89.236	34.6361	88.5078	34.4298	89.5758	45.7163	88.9812	45.4372	88.4472	45.061	87.9496	44.6241	87.5006	44.1508	87.0637	43.6532	86.6874	43.1192	86.1899	42.6944	85.6316	42.3425	85.1704	41.8813	84.77	41.3716	84.4666	40.7891	84.0661	40.2551	83.6777	39.7333	83.4957
20180905_SA71679	85.3079	32.1262	84.7402	32.3731	78.3717	34.0886	77.5078	33.669	77.0017	33.1012	85.2832	28.9173	84.7525	28.6828	78.0631	27.2758	77.2362	27.8559	76.7302	28.4113	87.9491	32.1386	87.4307	32.6076	86.7766	32.8421	86.1101	33.0642	85.4313	33.2	84.7772	33.4345	84.086	33.5332	83.4443	33.8171	82.7778	34.0269	82.099	34.1997	81.4202	34.3231	80.7167	34.3848	80.0255	34.3848	79.3344	34.3478	78.6556
OldMill_20160525009	16.2946	25.2854	15.8626	25.2957	13.5274	25.0694	13.2908	24.8431	13.1879	24.5756	16.6238	24.1745	16.2432	23.8864	14.1138	22.9091	13.7846	23.0223	13.548	23.1766	17.1999	25.4912	16.9735	25.6146	16.7164	25.6764	16.4489	25.6969	16.1917	25.6969	15.9243	25.6764	15.6671	25.6558	15.4099	25.6249	15.1425	25.6146	14.8853	25.5838	14.6281	25.5323	14.3709	25.4706	14.1138	25.4192	13.8566	25.3472	13.6611
Parthenia_20161110_SA55537	26.2137	38.4798	26.0898	38.1435	25.4172	35.4	25.7535	35.046	26.0013	34.869	27.5235	38.4444	27.612	38.1081	28.2138	35.2407	27.9306	34.9575	27.5766	34.869	26.1252	39.5064	25.9836	39.2409	25.8597	38.9754	25.7712	38.6922	25.6827	38.409	25.5942	38.1081	25.5234	37.8249	25.4526	37.5417	25.3818	37.2408	25.2933	36.9576	25.2225	36.6744	25.1871	36.3735	25.1694	36.0726	25.2048	35.7894	25.3641
Parthenia_20170817_SA56202	26.3723	53.0967	26.0554	52.9734	22.8513	51.1777	22.64	50.6144	22.6752	50.1919	27.4638	51.8643	27.2701	51.5827	25.0343	48.6602	24.5062	48.5194	23.9604	48.6074	27.4814	54.1002	27.0941	54.065	26.7244	53.9593	26.3547	53.8185	26.0026	53.66	25.6505	53.484	25.316	53.2903	24.9815	53.0967	24.6294	52.9206	24.3125	52.7094	24.0132	52.4453	23.7315	52.1812	23.4323	51.9524	23.1682	51.6531	22.9745
Eliza_20170906_SA56304	48.6356	38.4981	48.2323	38.5507	45.9873	38.3227	45.8294	38.0947	45.7593	37.8842	48.9338	37.4107	48.583	37.1301	46.5134	36.183	46.2854	36.3057	46.0574	36.4636	49.3898	38.7086	49.1794	38.8313	48.9338	38.884	48.7058	38.884	48.4603	38.884	48.2147	38.8664	47.9692	38.8489	47.7236	38.8489	47.4781	38.8313	47.2501	38.7963	47.0045	38.7437	46.759	38.691	46.531	38.6384	46.303	38.5507	46.0925
Eliza_20161103_SA55493	29.1859	38.5317	28.9032	38.6201	25.6702	38.7791	25.3875	38.4787	25.2991	38.1784	29.3802	37.2597	29.0622	37.1184	26.1295	36.0053	25.7585	36.1643	25.4581	36.4117	30.4049	38.6907	30.1222	38.8674	29.8042	38.9911	29.4686	39.0794	29.1329	39.1147	28.7795	39.1147	28.4439	39.1324	28.1082	39.1677	27.7725	39.1854	27.4192	39.1854	27.0835	39.1854	26.7478	39.1501	26.4122	39.0971	26.0942	38.9734	25.7762
20150211_SA51700	20.1259	8.31757	19.7888	8.41386	17.2611	8.88331	17.0564	8.76294	16.8999	8.57034	20.1018	7.14998	19.7768	7.11387	17.2611	6.77683	17.0324	6.9935	16.8879	7.25831	20.9444	8.35368	20.7036	8.46201	20.4509	8.54627	20.1981	8.63053	19.9453	8.71479	19.6925	8.79905	19.4398	8.87127	19.187	8.95553	18.9342	9.02775	18.6694	9.0759	18.4046	9.09997	18.1398	9.11201	17.8749	9.11201	17.6222	9.0759	17.3694
20170215_SA55930	13.9432	12.9384	13.6455	12.8392	11.8964	11.8468	11.884	11.6731	11.9212	11.4994	14.5263	12.1817	14.3154	11.9584	12.9384	10.5815	12.7275	10.5691	12.5539	10.6435	14.4766	13.4098	14.2658	13.4098	14.0549	13.3478	13.8564	13.2734	13.6579	13.1865	13.4594	13.0997	13.2734	13.0004	13.0749	12.9136	12.8764	12.8144	12.6903	12.7027	12.5166	12.5911	12.3554	12.4546	12.1941	12.3058	12.0577	12.1321	11.9584
20170215_SA55970	13.428	12.4503	13.1557	12.1904	11.4478	10.9033	11.3735	10.5815	11.423	10.3092	14.1829	11.7077	13.9849	11.4354	12.8834	9.56665	12.6359	9.52952	12.3512	9.55427	13.8487	12.9824	13.626	12.9329	13.4156	12.8339	13.2299	12.7102	13.0443	12.574	12.871	12.4255	12.673	12.3017	12.4874	12.1656	12.3017	12.0418	12.1161	11.8933	11.9552	11.7448	11.782	11.5839	11.6458	11.4107	11.5221	11.2127	11.4726
20170215_SA56041	17.614	6.59597	17.3175	6.8183	15.3782	7.59648	15.1559	7.51002	14.9706	7.39885	17.4287	5.71898	17.0828	5.69427	15.0077	5.83014	14.8348	6.02778	14.7359	6.18835	18.3798	6.47245	18.2316	6.64538	18.0463	6.78125	17.8486	6.89242	17.6387	6.97888	17.4287	7.06534	17.2187	7.15181	17.0087	7.25062	16.7987	7.32474	16.5887	7.4112	16.3664	7.48531	16.1441	7.53472	15.9217	7.57178	15.687	7.58413	15.4647
20171114_SA56654	16.832	6.2324	16.4681	6.34613	14.5233	6.91478	14.2731	6.80105	14.1025	6.60771	16.7411	5.16334	16.3999	5.10648	14.3755	4.89039	14.1594	5.06098	14.0002	5.2657	17.4462	6.19829	17.2642	6.31201	17.0709	6.403	16.8775	6.49398	16.6728	6.56222	16.4795	6.64183	16.2748	6.72144	16.0814	6.81243	15.8767	6.88066	15.6606	6.91478	15.4559	6.9489	15.2398	6.97165	15.0237	6.98302	14.8076	6.97165	14.6029
20171117_SA56825	16.8053	6.12563	16.4587	6.31125	14.3674	7.09087	14.1075	7.01663	13.9466	6.85575	16.5701	5.03662	16.1865	5.07375	13.9466	5.27175	13.8229	5.50687	13.7858	5.68013	17.4735	6.02663	17.3374	6.21225	17.1517	6.36075	16.9537	6.4845	16.731	6.57113	16.5083	6.64537	16.2855	6.732	16.0751	6.831	15.8524	6.93	15.642	7.029	15.4192	7.10325	15.1841	7.15275	14.949	7.1775	14.7139	7.18987	14.4911
20180212_SA57197	17.8769	7.81504	17.535	7.92494	14.8486	8.49886	14.5921	8.35232	14.4334	8.14474	17.8647	6.5451	17.4984	6.47183	14.8242	6.02002	14.5677	6.26424	14.4578	6.45962	18.866	7.85167	18.634	8.02263	18.3776	8.15695	18.1089	8.24243	17.8281	8.30348	17.535	8.35232	17.2664	8.4378	16.9855	8.52328	16.7046	8.59654	16.4238	8.64539	16.1429	8.69423	15.8499	8.70644	15.569	8.69423	15.2882	8.63318	15.0073
20180212_SA57340	21.9514	9.67788	21.6053	9.61608	18.8366	8.8374	18.6636	8.51604	18.6389	8.1576	22.5694	8.50368	22.3222	8.26884	20.085	6.46428	19.6277	6.53844	19.3434	6.72384	22.8907	10.2712	22.5941	10.3206	22.2851	10.2835	21.9884	10.2217	21.7042	10.1599	21.4075	10.0734	21.1109	9.99924	20.8142	9.92508	20.53	9.85092	20.2333	9.7644	19.949	9.67788	19.6648	9.56664	19.3928	9.41832	19.1456	9.24528	18.9602
20180212_SA57503	17.3304	7.79428	17.0171	7.89453	14.6237	8.48349	14.2853	8.27046	14.1224	7.96972	17.3429	6.59131	17.0046	6.466	14.4858	6.09007	14.2477	6.31562	13.9971	6.56624	18.3078	7.78175	18.1198	7.96972	17.8817	8.08249	17.6311	8.17021	17.368	8.23287	17.1048	8.27046	16.8417	8.32058	16.591	8.43336	16.3404	8.52108	16.0898	8.59627	15.8267	8.64639	15.5635	8.65892	15.2878	8.65892	15.0372	8.63386	14.7866
20180514_SA60041	22.5057	14.5861	22.2175	14.6863	19.0471	14.8868	18.7464	14.6362	18.5083	14.2853	22.7312	13.2453	22.443	13.1701	19.3729	12.2678	19.0346	12.4683	18.7213	12.7691	23.6209	14.7991	23.3202	14.937	23.0069	14.9871	22.6811	15.0247	22.3553	15.0372	22.0295	15.0497	21.7037	15.0999	21.3904	15.1625	21.0646	15.2126	20.7388	15.2252	20.413	15.2252	20.0872	15.2001	19.7614	15.175	19.4356	15.1124	19.1599
20180514_SA60155	20.0448	8.97959	19.6952	9.04204	17.2598	9.11697	17.0475	8.86719	16.9101	8.65488	20.2322	7.81811	19.9075	7.68074	17.572	6.89393	17.2973	7.05628	17.0974	7.23113	20.9565	9.09199	20.7317	9.24186	20.482	9.31679	20.2197	9.35426	19.9449	9.37924	19.6827	9.37924	19.4204	9.41671	19.1581	9.45417	18.8959	9.47915	18.6211	9.49164	18.3588	9.47915	18.0966	9.45417	17.8218	9.41671	17.572	9.35426	17.3472
20190830_73617	15.1657	19.1099	15.3006	18.7845	16.2291	16.6339	16.4751	16.5704	16.6894	16.5545	16.1101	19.6575	16.3482	19.4353	17.9354	17.6893	17.9036	17.3878	17.7766	17.2052	14.6975	19.6654	14.6657	19.4273	14.7451	19.2051	14.8403	18.9829	14.9356	18.7607	15.0467	18.5544	15.1101	18.3242	15.1736	18.0861	15.2609	17.8639	15.3641	17.6497	15.4673	17.4354	15.5942	17.2291	15.7212	17.0307	15.8799	16.8481	16.0704
20191118_SA74059	52.3856	40.9161	52.0039	40.9829	48.8741	41.3837	48.4066	41.0879	48.168	40.8016	52.4524	39.5325	52.0516	39.4275	49.0173	38.5306	48.5211	38.7978	48.2825	39.1127	53.502	41.0783	53.2062	41.2214	52.8913	41.3073	52.5764	41.3837	52.252	41.4027	51.9276	41.4218	51.6031	41.4886	51.2882	41.5554	50.9638	41.584	50.6394	41.5936	50.315	41.6127	49.9905	41.5936	49.6566	41.584	49.3417	41.5363	49.0268
20191120_SA74758	27.8037	12.9789	27.573	12.7578	25.9482	11.4022	25.8809	11.1619	25.929	10.9119	28.7362	12.3251	28.592	12.0463	27.5826	9.95049	27.323	9.86396	27.0634	9.90242	28.2459	13.5942	28.0248	13.5557	27.8325	13.45	27.6403	13.3154	27.4672	13.1808	27.2941	13.027	27.1403	12.8635	26.9673	12.7097	26.7942	12.5751	26.6212	12.4213	26.4673	12.2578	26.3231	12.0848	26.1885	11.9021	26.0636	11.7099	25.9866
20200227_SA76456	19.1668	9.68031	18.8083	9.71907	16.7249	10.126	16.4924	10.0098	16.3664	9.7869	19.1668	8.58534	18.8277	8.5272	16.7443	8.15898	16.4536	8.26557	16.2986	8.48844	19.8742	9.75783	19.661	9.81597	19.4381	9.85473	19.2153	9.8838	19.0021	9.93225	18.7889	10.0098	18.5854	10.097	18.3722	10.1551	18.1494	10.1939	17.9265	10.2133	17.7133	10.2326	17.4904	10.2326	17.2676	10.223	17.0447	10.1842	16.8315
2018021420180214_SA57744_ABS	17.7937	11.138	17.4744	11.1257	15.0553	10.7818	14.8465	10.4871	14.8097	10.1801	18.2235	10.1187	17.9656	9.95908	15.8535	8.6574	15.5465	8.76792	15.3377	8.97668	18.5551	11.5432	18.3095	11.5923	18.0516	11.5923	17.806	11.58	17.5604	11.5432	17.3148	11.4941	17.0569	11.4818	16.8113	11.4572	16.5657	11.4081	16.3078	11.3713	16.0622	11.3222	15.8166	11.2608	15.5833	11.1748	15.3746	11.0397	15.1781
2018021420180214_SA57889_ABS	18.1086	5.57949	17.8618	5.83871	16.0225	7.46812	15.6892	7.41874	15.43	7.25827	17.5285	4.48087	17.1828	4.55494	14.7758	5.45605	14.677	5.77699	14.6276	6.0609	18.8987	5.15979	18.7999	5.40667	18.6518	5.61652	18.4666	5.81402	18.2691	5.96215	18.0593	6.13497	17.8618	6.30778	17.689	6.50529	17.5285	6.70279	17.3557	6.9003	17.1458	7.04842	16.9113	7.18421	16.6891	7.30765	16.4422	7.4064	16.183
2018021420180214_SA58085_ABS	17.689	8.09766	17.331	8.0236	15.3559	7.39406	15.2819	7.18421	15.2819	6.93733	18.1704	7.18421	17.8865	6.92498	16.2447	5.71527	15.9855	5.7523	15.7263	5.88809	18.2321	8.51736	18.0099	8.51736	17.8	8.50502	17.5779	8.46798	17.368	8.41861	17.1582	8.34454	16.9483	8.29517	16.7385	8.24579	16.5163	8.19642	16.3188	8.12235	16.1213	8.0236	15.9238	7.93719	15.7263	7.83844	15.5658	7.69031	15.4177
2018021620180216_SA58260_ABS	19.2604	5.8883	18.9438	5.96427	16.5759	6.58476	16.272	6.38215	16.1073	6.07824	19.2604	4.73596	18.9565	4.68531	16.4872	4.19145	16.2086	4.40672	16.0314	4.73596	20.1468	5.92628	19.9442	6.07824	19.7163	6.20487	19.463	6.28085	19.2224	6.35683	18.9692	6.40748	18.7159	6.48346	18.4753	6.55943	18.2221	6.63541	17.9688	6.69873	17.7155	6.73672	17.4623	6.7747	17.1964	6.78737	16.9431	6.74938	16.7025
2018021620180216_SA58466_ABS	19.5057	7.98782	19.1684	8.07216	16.7949	8.42155	16.554	8.20469	16.3853	7.91554	19.6141	6.81917	19.3009	6.67459	16.8431	6.08424	16.554	6.31315	16.3973	6.55411	20.3491	8.1324	20.1202	8.24083	19.8672	8.32517	19.6262	8.37336	19.3611	8.39746	19.1081	8.4336	18.8551	8.49384	18.6142	8.56613	18.3612	8.63842	18.1202	8.68661	17.8551	8.7107	17.6021	8.69866	17.3491	8.63842	17.1082	8.56613	16.8672
2018021620180216_SA58539_ABS	17.6103	6.63049	17.2844	6.74329	15.0032	7.13185	14.7901	6.98144	14.6522	6.73076	17.5852	5.50243	17.2844	5.42722	14.9907	5.10134	14.7776	5.25175	14.6272	5.45229	18.2996	6.75583	18.0866	6.8561	17.8609	6.91877	17.6228	6.9689	17.3972	7.00651	17.1716	7.05664	16.9585	7.15691	16.7204	7.21958	16.4947	7.26972	16.2566	7.29479	16.031	7.30732	15.7928	7.30732	15.5547	7.30732	15.3165	7.26972	15.1035
2018021620180216_SA58801_ABS	16.9264	5.96312	16.6424	6.19769	14.9387	7.18537	14.63	7.12364	14.3954	6.98784	16.556	5.02482	16.198	5.02482	14.1856	5.49397	14.0621	5.66681	14.0004	5.92608	17.6424	5.7162	17.556	5.92608	17.4079	6.08658	17.2227	6.22238	17.0375	6.34584	16.8399	6.45696	16.6548	6.58042	16.4819	6.71622	16.2967	6.85203	16.0992	6.9508	15.8893	7.03722	15.6794	7.12364	15.4695	7.18537	15.2473	7.23476	15.0251
OldMill_20170524_SA56169	56.4678	12.415	56.0864	12.4997	54.448	12.3585	54.335	12.2173	54.2503	12.0195	56.6937	11.5676	56.3971	11.2992	54.7305	10.8049	54.6034	10.8755	54.5045	11.0167	56.8915	12.5845	56.7361	12.6551	56.5807	12.6975	56.4113	12.7116	56.2418	12.7116	56.0723	12.6975	55.9169	12.6692	55.7474	12.6834	55.5779	12.6692	55.4085	12.641	55.2531	12.6127	55.0836	12.5845	54.9141	12.5704	54.7587	12.528	54.6175
Parthenia_20171109_SA56605	26.2496	22.5423	26.1793	22.9816	25.1251	24.5804	24.9318	24.6331	24.7737	24.598	25.4765	21.8571	25.0724	22.0152	23.7371	23.2802	23.7546	23.4911	23.7898	23.6317	26.601	22.0504	26.5834	22.2612	26.5483	22.4545	26.4956	22.6653	26.4077	22.841	26.3199	23.0343	26.2144	23.21	26.109	23.3857	26.0036	23.5614	25.8982	23.7371	25.7752	23.9128	25.6698	24.0885	25.5468	24.2642	25.4238	24.4223	25.2481
Eliza_20141013_SA50417	55.3811	5.47884	55.0287	5.81526	53.3466	6.37596	53.2024	6.29586	53.0422	6.21576	55.1569	4.66182	54.6763	4.54968	52.9301	4.70988	52.7539	4.87008	52.6738	5.03028	55.9418	5.35068	55.8297	5.51088	55.6695	5.63904	55.5253	5.7672	55.3651	5.87934	55.1729	5.94342	54.9806	5.99148	54.8044	6.0876	54.6282	6.1677	54.452	6.2478	54.2597	6.31188	54.0675	6.35994	53.8753	6.39198	53.667	6.408	53.4748
Eliza_20141013_SA50429	33.5509	15.3143	33.7904	14.8192	35.3554	13.4459	35.5949	13.4299	35.7865	13.5417	34.2216	16.2564	34.7485	16.1287	36.4093	15.2344	36.553	14.947	36.5371	14.6755	33.0239	15.7933	33.0718	15.5698	33.1516	15.3462	33.2794	15.1386	33.4071	14.947	33.5828	14.7873	33.7585	14.6276	33.9182	14.4679	34.0938	14.3082	34.2695	14.1326	34.4611	13.9888	34.6527	13.8611	34.8124	13.6854	35.004	13.5577	35.2276
Eliza_20141013_SA50430	44.4201	42.7538	43.8488	42.5633	42.1666	41.1509	42.0872	40.8811	42.1031	40.6589	45.3565	41.9603	45.2454	41.4366	43.8171	39.6274	43.5473	39.6274	43.3092	39.6274	44.928	43.2299	44.6899	43.214	44.4519	43.1347	44.2297	43.0553	44.0234	42.9442	43.8329	42.7855	43.6425	42.6427	43.4362	42.5157	43.2299	42.3888	43.0394	42.2301	42.8649	42.0872	42.6903	41.9127	42.5316	41.7222	42.3888	41.5318	42.2618
Eliza_20141013_SA50435	19.8559	27.7125	19.6178	28.1252	17.9512	29.5537	17.6338	29.5378	17.3957	29.4743	19.2686	26.8554	18.7924	26.8872	16.8402	27.7443	16.7132	28.0617	16.6815	28.3474	20.4114	27.284	20.3638	27.522	20.2685	27.7284	20.1416	27.9347	19.9987	28.1252	19.8241	28.2839	19.6337	28.4426	19.4591	28.6013	19.2845	28.7442	19.1099	28.9188	18.9036	29.0458	18.7131	29.1727	18.5068	29.2838	18.3004	29.4108	18.0782
Eliza_20141013_SA50457	27.0186	27.2095	26.5571	27.3846	24.6795	27.3209	24.5522	27.1459	24.4408	26.9708	27.114	26.1752	26.6844	25.9047	24.8864	25.5069	24.7113	25.6342	24.6318	25.8093	27.5755	27.2573	27.4005	27.3527	27.2095	27.4323	27.0186	27.5118	26.8117	27.5596	26.6208	27.5755	26.4139	27.5914	26.2071	27.6073	26.0002	27.6073	25.7934	27.6073	25.5865	27.5914	25.3956	27.5755	25.1887	27.5437	24.9978	27.4959	24.8068
Eliza_20141014_SA50493	33.5396	26.3968	33.0476	26.0952	31.873	24.5397	31.873	24.2857	31.9682	24	34.4127	25.9365	34.3968	25.3968	33.6031	23.5555	33.3809	23.3968	33.0317	23.3651	33.8095	26.9206	33.6031	26.8571	33.4127	26.7619	33.2222	26.6349	33.0793	26.4762	32.9365	26.3174	32.8095	26.127	32.6666	25.9682	32.5079	25.8095	32.3809	25.6349	32.2539	25.4603	32.1428	25.2857	32.0317	25.0952	31.9365	24.9047	31.9047
Eliza_20141014_SA50494	22.161	13.8091	22.683	13.9357	24.3914	14.8373	24.4863	15.1378	24.4704	15.3751	21.5758	14.6475	21.8288	15.1378	23.205	16.514	23.4581	16.5298	23.6795	16.4665	21.6707	13.4453	21.8921	13.4295	22.0977	13.4295	22.3034	13.4769	22.509	13.556	22.6988	13.6668	22.8886	13.7617	23.0785	13.8566	23.2841	13.9515	23.4739	14.0464	23.6637	14.1413	23.8535	14.2678	24.0117	14.3944	24.1857	14.5209	24.2964
Eliza_20141015_SA50572	28.1813	40.0574	27.5957	39.9372	25.8841	39.0364	25.719	38.7511	25.749	38.4809	28.7818	39.2016	28.5266	38.7061	27.0853	37.4449	26.77	37.3698	26.4847	37.4749	28.8419	40.4477	28.6167	40.5078	28.3915	40.4928	28.1663	40.4627	27.9411	40.3877	27.7309	40.2976	27.5207	40.1925	27.3105	40.0874	27.1153	39.9823	26.9051	39.8772	26.7099	39.7721	26.5297	39.637	26.3195	39.5168	26.1544	39.3667	26.0042
Eliza_20141015_SA50573	37.5571	36.5181	36.9698	36.6235	35.0272	36.2018	34.8315	35.976	34.7712	35.7501	37.8583	35.5091	37.4969	35.0875	35.7199	34.3345	35.4188	34.4098	35.223	34.5755	38.2499	36.6837	38.039	36.759	37.8131	36.8042	37.5722	36.8343	37.3463	36.8343	37.1204	36.8042	36.8946	36.7741	36.6687	36.744	36.4277	36.7138	36.2018	36.6687	35.991	36.6084	35.7651	36.5331	35.5392	36.488	35.3284	36.3976	35.1326
Eliza_20141015_SA50579	29.5778	31.7164	29.2465	31.385	28.2375	29.8941	28.2676	29.623	28.373	29.367	30.4814	31.2796	30.4965	30.7826	29.8941	29.126	29.6682	28.9754	29.3971	28.9453	29.9694	32.2886	29.7586	32.2435	29.5778	32.123	29.4122	32.0025	29.2616	31.8519	29.126	31.6712	29.0658	31.4754	28.9303	31.3097	28.7947	31.1441	28.6592	30.9784	28.5387	30.7977	28.4634	30.6019	28.358	30.4061	28.2827	30.2104	28.2526
Eliza_20141015_SA50582	21.3683	12.8841	21.9045	12.9787	23.655	14.1772	23.7339	14.4296	23.7654	14.7292	20.5799	13.7041	20.7691	14.2403	22.2357	15.8015	22.5196	15.8489	22.7876	15.8489	20.7375	12.4268	20.9741	12.3952	21.2264	12.4425	21.463	12.5056	21.6995	12.5687	21.9203	12.6633	22.1095	12.821	22.3303	12.9314	22.5353	13.0733	22.7403	13.1995	22.9454	13.3256	23.1346	13.4833	23.3238	13.6253	23.4815	13.8303	23.5761
Eliza_20141015_SA50583	9.57531	19.5909	9.71681	18.9934	11.2105	17.3582	11.5564	17.2953	11.8866	17.3739	10.2514	20.4085	10.8803	20.3613	12.7671	19.1663	12.8457	18.8362	12.8614	18.4745	9.025	20.1569	9.04073	19.9053	9.10362	19.6537	9.18223	19.4179	9.29229	19.1978	9.4338	18.9934	9.62248	18.8204	9.77971	18.616	9.95266	18.4274	10.1256	18.2387	10.2986	18.05	10.4872	17.8928	10.6759	17.7198	10.8646	17.5626	11.0847
Eliza_20141015_SA50586	23.9448	13.5037	23.6275	13.71	22.0565	14.4557	21.755	14.3764	21.5805	14.2336	23.6909	12.6151	23.326	12.6309	21.5963	12.7896	21.5011	12.9959	21.4694	13.1387	24.5637	13.3291	24.4367	13.4719	24.2939	13.5989	24.1511	13.7417	23.9765	13.8369	23.7861	13.9004	23.6275	13.9956	23.437	14.0749	23.2784	14.1701	23.1038	14.2495	22.9134	14.3129	22.723	14.3764	22.5326	14.4081	22.3421	14.4399	22.1517
Eliza_20141015_SA50587	35.374	36.4241	34.9978	36.8159	33.4462	37.6465	33.117	37.6309	32.8976	37.4741	35.0135	35.4837	34.4336	35.468	32.6469	35.8755	32.4274	36.1419	32.3961	36.3927	35.9382	36.2516	35.8285	36.4241	35.7031	36.5808	35.562	36.7218	35.4053	36.8316	35.2172	36.9099	35.0292	37.004	34.8568	37.0823	34.6843	37.192	34.5276	37.3017	34.3395	37.3958	34.1671	37.4741	33.9791	37.5682	33.791	37.6152	33.5872
Eliza_20141015_SA50588	56.4936	17.6781	56.0017	17.9161	53.6372	17.8526	53.4944	17.6781	53.3992	17.3766	56.811	16.5196	56.4143	15.9642	54.1609	15.4088	53.9705	15.5358	53.8435	15.7897	57.1443	17.7891	56.9062	17.8685	56.6682	17.932	56.4302	17.9954	56.1921	18.0589	55.9382	18.0748	55.7002	18.0907	55.4463	18.1065	55.2083	18.1224	54.9543	18.1383	54.7163	18.1224	54.4624	18.1224	54.2244	18.0907	53.9863	18.0113	53.7642
Eliza_20171114_SA56623	19.1208	31.751	18.6471	31.8036	16.8403	31.2774	16.7	31.0844	16.6649	30.8213	19.5067	30.8388	19.2611	30.488	17.6648	29.5583	17.3666	29.5934	17.1385	29.7161	19.6997	31.9791	19.5067	32.0492	19.2962	32.0843	19.0857	32.0843	18.8752	32.0492	18.6822	31.9966	18.4717	31.944	18.2612	31.9089	18.0683	31.8738	17.8578	31.8212	17.6648	31.751	17.4718	31.6633	17.2789	31.5931	17.0859	31.5054	16.928
Eliza_20160304_SA54216	31.5949	18.6131	31.1037	18.543	29.5249	17.8237	29.4196	17.6658	29.367	17.4728	32.0861	17.7535	31.8756	17.3676	30.4196	16.3501	30.1564	16.3325	29.9284	16.3676	32.0861	18.8763	31.8932	18.8938	31.7002	18.8938	31.5072	18.8587	31.3143	18.8061	31.1388	18.7535	30.9634	18.6833	30.7704	18.6131	30.595	18.5254	30.4196	18.4377	30.2617	18.35	30.0862	18.2623	29.9108	18.1745	29.7529	18.0693	29.6126
Eliza_20160524_SA54349	53.2849	33.7112	52.7011	33.7295	50.8405	33.1822	50.6763	32.9998	50.6215	32.7809	53.7044	32.7444	53.3761	32.3066	51.6613	31.4492	51.3877	31.4857	51.1871	31.5769	53.8686	33.9666	53.6497	34.0396	53.4308	34.0396	53.2119	34.0396	52.993	34.0213	52.7741	33.9666	52.5734	33.8936	52.3545	33.8389	52.1356	33.7842	51.9167	33.7295	51.6978	33.6747	51.4972	33.5835	51.2965	33.4741	51.1141	33.3646	50.9134
Eliza_20161031_SA55413	42.9254	22.245	42.4579	22.3349	40.6236	22.4608	40.4977	22.3709	40.4618	22.1371	43.0873	21.202	42.6737	20.8783	40.9473	20.5006	40.7315	20.5726	40.5696	20.7344	43.4649	22.3169	43.2851	22.4068	43.1053	22.4788	42.9074	22.5147	42.6916	22.5327	42.4938	22.5507	42.296	22.5687	42.0982	22.5866	41.9004	22.5866	41.6846	22.5866	41.4868	22.5866	41.289	22.5866	41.0912	22.5866	40.8933	22.5507	40.6955
Eliza_20171120_SA57101	22.0521	30.4091	21.6598	30.5455	19.6644	30.4432	19.4768	30.2556	19.3574	30.0339	22.2738	29.4369	21.8986	29.1811	20.0226	28.516	19.7667	28.6012	19.6133	28.7718	22.8025	30.5796	22.6149	30.699	22.4103	30.8013	22.1886	30.8354	21.9668	30.8525	21.7451	30.8696	21.5234	30.8354	21.2846	30.8525	21.0629	30.8696	20.8412	30.8696	20.6195	30.8184	20.3978	30.7843	20.1761	30.7331	19.9714	30.6649	19.7667
Eliza_20160307_SA54255	33.573	48.5003	33.3023	48.9516	32.0748	50.1429	31.8222	50.1609	31.5514	50.0887	32.9051	47.652	32.3817	47.8686	30.8655	48.7891	30.7752	48.9516	30.8474	49.096	34.0243	48.1033	34.0062	48.3018	33.934	48.5003	33.8257	48.6628	33.7174	48.8252	33.573	48.9877	33.4466	49.1321	33.3023	49.2765	33.1579	49.4209	33.0315	49.5834	32.8871	49.7097	32.7246	49.8361	32.5622	49.9624	32.3817	50.0526	32.1831
Eliza_20160826_SA54967	22.1167	31.7249	21.6719	31.6893	20.1595	30.8531	20.0883	30.6929	20.0883	30.515	22.6505	30.9776	22.4548	30.6218	21.0491	29.5364	20.8356	29.572	20.6221	29.6431	22.7039	32.0808	22.5081	32.0986	22.2946	32.0808	22.0989	32.0274	21.9032	31.974	21.7075	31.9206	21.5117	31.8495	21.316	31.7783	21.1381	31.6893	20.9602	31.6004	20.7644	31.5114	20.6043	31.4046	20.4442	31.2801	20.284	31.1555	20.1773
Eliza_20161103_SA55437	65.4475	6.4874	65.0174	6.7383	63.1178	7.41929	62.9206	7.34761	62.7414	7.20424	65.2683	5.43006	64.7665	5.25085	62.8489	5.41214	62.6518	5.57343	62.5622	5.75264	66.0747	6.32611	65.9314	6.4874	65.7342	6.59493	65.555	6.72037	65.3579	6.8279	65.1608	6.89959	64.9636	6.98919	64.7486	7.0788	64.5514	7.15048	64.3543	7.24008	64.1393	7.29385	63.9242	7.34761	63.7092	7.40137	63.4941	7.45514	63.2791
Eliza_20161103_SA55436	60.3924	38.089	59.9995	38.339	58.0888	39.1425	57.8388	39.0711	57.6245	38.9461	60.1424	36.9997	59.6602	36.9997	57.5888	37.1604	57.3924	37.339	57.2495	37.5711	61.1245	37.7676	61.0531	37.9997	60.8745	38.1604	60.6959	38.3211	60.4995	38.464	60.2852	38.589	60.0531	38.6604	59.8388	38.7675	59.6067	38.8568	59.3924	38.964	59.1602	39.0354	58.9281	39.1068	58.696	39.1604	58.4638	39.1783	58.2138
Eliza_20160826_SA54973	30.6827	13.4906	30.3143	13.7011	28.6126	13.9467	28.4723	13.8765	28.3846	13.7362	30.6827	12.631	30.2792	12.4204	28.6126	12.3678	28.4372	12.5082	28.3495	12.666	31.2616	13.4379	31.1037	13.5607	30.9459	13.6485	30.7704	13.7186	30.595	13.8063	30.402	13.8414	30.209	13.8765	30.0336	13.9467	29.8582	14.0169	29.6652	14.0695	29.4722	14.087	29.2793	14.1221	29.0863	14.1221	28.9109	14.087	28.7179
Eliza_20160301_SA54001	51.2373	43.3931	50.6339	43.3241	48.8582	42.5311	48.703	42.3242	48.5996	42.1001	51.7372	42.5656	51.4097	42.0484	49.7719	40.9622	49.5133	40.9278	49.2892	41.014	51.7028	43.7206	51.4786	43.7379	51.2718	43.7206	51.0649	43.6862	50.8408	43.6517	50.6511	43.5482	50.4615	43.462	50.2546	43.3931	50.0477	43.3069	49.8581	43.2034	49.6512	43.1345	49.4616	43.031	49.2719	42.9276	49.0995	42.7897	48.9616
Eliza_20171117_SA56958	34.9303	4.48266	34.5337	4.793	32.8269	5.32747	32.62	5.27575	32.482	5.13782	34.7061	3.65509	34.2406	3.53441	32.4303	3.70682	32.2579	3.84474	32.2234	3.96543	35.5509	4.36197	35.4303	4.53438	35.2923	4.67231	35.1199	4.793	34.9303	4.89644	34.7406	4.96541	34.551	5.05161	34.3613	5.12058	34.1717	5.20678	33.9648	5.27575	33.7751	5.32747	33.5682	5.36195	33.3613	5.37919	33.1544	5.37919	32.9476
Eliza_20161031_SA55414	48.8131	10.509	48.4435	10.5266	46.8944	10.0865	46.7536	9.9457	46.7008	9.73446	49.1652	9.69925	48.8659	9.43521	47.4401	8.67828	47.2817	8.64307	47.0352	8.69588	49.2356	10.773	49.0596	10.7906	48.9011	10.7906	48.7251	10.7906	48.5491	10.773	48.3906	10.7378	48.2322	10.685	48.0562	10.6322	47.8978	10.597	47.7217	10.5618	47.5633	10.4914	47.4049	10.4386	47.2465	10.3682	47.1056	10.2978	46.9648
Eliza_20170215_SA55962	43.0899	47.3203	42.6258	47.5703	40.9836	47.9629	40.8051	47.8201	40.6623	47.6595	43.0185	46.3743	42.5187	46.1958	40.7873	46.2315	40.6088	46.3922	40.5731	46.5707	43.679	47.2668	43.5718	47.4275	43.4112	47.5346	43.2327	47.6416	43.0542	47.6952	42.8578	47.7488	42.6793	47.7844	42.483	47.838	42.2867	47.8916	42.1082	47.9451	41.9118	47.9808	41.7154	47.9986	41.5191	48.0165	41.3227	48.0165	41.1264
Eliza_20160829_SA55046	28.0431	53.8792	27.4125	53.8442	25.5558	52.8107	25.3807	52.5655	25.3281	52.2502	28.7438	52.9158	28.481	52.3203	26.9396	50.9365	26.6243	50.8665	26.2915	50.9015	28.5861	54.3171	28.3409	54.3171	28.1132	54.2996	27.868	54.2646	27.6402	54.212	27.4301	54.1069	27.2374	53.9843	27.0097	53.8792	26.7995	53.7566	26.5893	53.6515	26.3966	53.5289	26.1864	53.4063	25.9937	53.2662	25.8011	53.126	25.6434
Eliza_20161103_SA55442	42.2125	70.0017	41.7466	70.0376	39.937	69.5896	39.7937	69.4642	39.7399	69.2492	42.5529	69.1238	42.2304	68.7296	40.5999	67.8875	40.3849	67.9233	40.2057	68.0488	42.732	70.1809	42.535	70.2167	42.3379	70.2346	42.1408	70.2526	41.9437	70.2526	41.7466	70.2346	41.5495	70.2167	41.3704	70.1809	41.1733	70.1271	40.9762	70.0734	40.7791	70.0196	40.5999	69.9659	40.4208	69.8942	40.2237	69.8225	40.0803
Eliza_20170215_SA55935	23.072	31.8053	22.8085	32.2095	21.4554	33.4922	21.227	33.4747	20.9634	33.4219	22.457	30.9443	21.9826	31.0322	20.4011	31.9459	20.2781	32.1216	20.2781	32.3676	23.5992	31.4539	23.5465	31.6647	23.4586	31.858	23.3532	32.0338	23.2126	32.1919	23.0545	32.3325	22.8963	32.4731	22.7557	32.6312	22.6152	32.7894	22.457	32.9299	22.2813	33.0529	22.1056	33.1759	21.9474	33.2989	21.7541	33.4044	21.5608
Eliza_20171114_SA56624	31.3804	52.2257	30.896	52.2257	29.2699	51.4645	29.1488	51.2396	29.1315	51.0148	31.8648	51.4126	31.6572	51.0148	30.2387	49.8384	30.0484	49.8384	29.8581	49.9076	31.8129	52.5717	31.6226	52.589	31.415	52.589	31.2247	52.5717	31.0344	52.5198	30.8441	52.4506	30.6711	52.3814	30.4808	52.3122	30.2905	52.243	30.1003	52.1738	29.9273	52.07	29.7716	51.9662	29.6159	51.8451	29.4602	51.724	29.3391
Eliza_20160307_SA54252	38.2307	22.7534	37.8571	23.0914	36.3094	23.7852	36.1137	23.7496	35.918	23.6073	37.9105	21.9173	37.4479	21.8817	35.7579	22.2909	35.6512	22.451	35.5978	22.5933	38.7822	22.5755	38.711	22.7534	38.5865	22.9135	38.4264	23.038	38.2663	23.1448	38.0884	23.2337	37.9105	23.3049	37.7326	23.3939	37.5547	23.5006	37.3768	23.5895	37.1989	23.6607	37.021	23.7319	36.8253	23.7852	36.6296	23.8208	36.4339
Eliza_20160711_SA54684	36.5721	31.9733	36.1722	32.2278	34.609	32.2642	34.3909	32.1551	34.3	31.9915	36.6448	31.1372	36.2268	30.8645	34.6817	30.6101	34.4999	30.6828	34.3909	30.8464	37.1356	31.9915	36.9902	32.1188	36.8266	32.1915	36.663	32.246	36.4812	32.3187	36.3176	32.3551	36.1359	32.3732	35.9541	32.4096	35.7723	32.4096	35.5906	32.4278	35.3906	32.4278	35.2088	32.4278	35.0271	32.4278	34.8453	32.4096	34.6817
Eliza_20161103_SA55441	66.4995	46.8032	66.1066	46.9639	64.3209	47.0711	64.1245	46.9282	63.9816	46.7496	66.5888	45.8925	66.2316	45.6961	64.4281	45.2318	64.2495	45.3568	64.0709	45.5354	67.1066	46.9282	66.928	47.0175	66.7495	47.0889	66.553	47.1425	66.3566	47.1782	66.1602	47.1961	65.9638	47.1961	65.7673	47.1961	65.5709	47.2139	65.3745	47.2318	65.178	47.2318	64.9816	47.2139	64.7852	47.2139	64.5888	47.1961	64.4102
Eliza_20170208_SA55663	49.9633	40.1282	49.3223	40.3296	46.8864	39.9633	46.6666	39.7619	46.5567	39.5604	50.2564	38.9011	49.8168	38.4432	47.4725	37.5641	47.1611	37.6556	46.923	37.8205	50.6227	40.3846	50.3846	40.4945	50.1282	40.5677	49.8534	40.586	49.597	40.586	49.3223	40.5494	49.0476	40.5494	48.7912	40.5311	48.5164	40.4945	48.26	40.4578	48.0036	40.4029	47.7289	40.3479	47.4725	40.293	47.2161	40.2014	47.0329
Eliza_20171120_SA57000	32.8386	41.131	32.4553	41.34	30.6261	41.4794	30.4868	41.34	30.3822	41.2007	32.8734	40.2425	32.5076	40.0509	30.6261	39.8244	30.4519	39.9289	30.33	40.1206	33.5354	41.0961	33.3786	41.2355	33.2044	41.3575	33.0128	41.4446	32.8212	41.4968	32.6121	41.5491	32.4031	41.5665	32.194	41.5665	31.985	41.6013	31.7759	41.6188	31.5669	41.6362	31.3578	41.6362	31.1313	41.6362	30.9223	41.6188	30.7306
Eliza_20170208_SA55669	36.9461	32.839	36.7854	33.3747	35.6783	35.2319	35.3747	35.2854	35.1069	35.3569	36.0354	32.1069	35.4997	32.4105	33.964	33.8569	33.9462	34.1962	33.9104	34.464	37.4997	32.214	37.5354	32.464	37.5176	32.714	37.4461	32.964	37.339	33.1962	37.2318	33.4104	37.089	33.6247	36.9461	33.839	36.8033	34.0533	36.6604	34.2497	36.5176	34.464	36.3569	34.6426	36.1961	34.839	36.0176	35.0354	35.8033
Eliza_20170906_SA56375	51.4845	33.3906	50.9425	33.4605	49.0895	32.7788	48.9496	32.569	48.9146	32.3592	51.939	32.3941	51.6069	31.9571	49.981	30.9956	49.7363	30.9781	49.509	31.083	52.0089	33.6354	51.7992	33.6878	51.5894	33.7053	51.3621	33.7053	51.1523	33.6878	50.9425	33.6354	50.7328	33.6004	50.523	33.5654	50.3132	33.513	50.1034	33.4431	49.9111	33.3731	49.7188	33.2682	49.5265	33.1634	49.3517	33.0585	49.1769
Eliza_20171120_SA57018	14.5191	26.0667	14.27	26.5294	12.7754	27.5614	12.4729	27.5969	12.206	27.5258	14.0031	25.2127	13.4693	25.3194	11.8146	26.1023	11.6722	26.2803	11.6366	26.476	15.0885	25.7643	15.0529	25.9778	14.9639	26.1735	14.8394	26.3514	14.7148	26.5116	14.5547	26.6361	14.3767	26.7785	14.1988	26.903	14.0387	27.0276	13.8785	27.1699	13.7006	27.2767	13.5049	27.3834	13.327	27.4902	13.1134	27.5258	12.8999
Eliza_20160708_SA54633	22.3903	33.0106	21.8976	32.9741	20.091	32.5544	19.7626	32.2077	19.6896	31.8245	22.9925	31.9522	22.7735	31.5873	21.1859	30.3647	20.8027	30.2917	20.4013	30.4012	23.1567	33.5398	22.9377	33.5763	22.7005	33.5763	22.4815	33.5581	22.2443	33.5216	22.0253	33.4851	21.8064	33.4486	21.5874	33.3938	21.3684	33.3391	21.1494	33.2661	20.9305	33.1931	20.7115	33.1201	20.5108	33.0106	20.3465	32.8646	20.1823
Eliza_20160711_SA54687	57.1247	37.471	56.852	37.8528	55.5975	38.7073	55.3793	38.7437	55.1793	38.6528	56.652	36.6529	56.1793	36.7438	54.8339	37.3074	54.6884	37.4892	54.6884	37.7438	57.5974	37.1801	57.5429	37.3438	57.4338	37.4892	57.3065	37.6165	57.1792	37.7438	57.052	37.871	56.9065	37.9801	56.7793	38.0892	56.6338	38.1983	56.4884	38.3074	56.3429	38.3983	56.1793	38.4892	56.0338	38.5801	55.8884	38.671	55.7066
Eliza_20171114_SA56774	35.0334	13.245	34.8404	13.6309	33.6299	14.8414	33.4545	14.8589	33.2791	14.8063	34.4194	12.5082	33.9983	12.631	32.5598	13.5257	32.4896	13.7362	32.4721	13.9467	35.4544	12.7713	35.4719	12.9643	35.4193	13.1572	35.3316	13.3502	35.2263	13.5081	35.1035	13.666	34.9807	13.8239	34.8404	13.9818	34.7001	14.1221	34.5773	14.2625	34.4369	14.4203	34.279	14.5431	34.1211	14.6659	33.9457	14.7712	33.7527
Eliza_20160711_SA54689	27.2897	47.7797	26.8897	47.8342	25.2534	47.616	25.0716	47.4706	25.0534	47.307	27.5079	46.907	27.1988	46.6706	25.6534	46.0343	25.4534	46.0888	25.308	46.2161	27.8351	47.9433	27.6715	48.0342	27.4897	48.0524	27.3079	48.0706	27.1261	48.0524	26.9442	48.0342	26.7624	47.9978	26.5806	47.9797	26.3988	47.9797	26.1988	47.9797	26.017	47.9615	25.8352	47.9251	25.6716	47.8706	25.5079	47.7978	25.3625
Eliza_20171120_SA57025	37.0093	12.9818	36.8365	13.4658	35.6956	14.866	35.4363	14.9351	35.1943	14.9005	36.2833	12.2039	35.782	12.3249	34.3646	13.3448	34.2954	13.5695	34.3127	13.7769	37.4242	12.5496	37.4069	12.7571	37.355	12.9645	37.3032	13.1546	37.2168	13.3448	37.113	13.5177	36.9748	13.6905	36.871	13.8634	36.75	14.0362	36.629	14.2091	36.4907	14.3474	36.3352	14.4857	36.1796	14.624	36.024	14.745	35.8339
Eliza_20150819_SA53300	28.4795	25.0787	28.0435	24.9915	26.5611	23.98	26.4914	23.7358	26.4914	23.544	29.1597	24.3811	28.9678	23.98	27.7122	22.6546	27.5203	22.6022	27.2762	22.672	28.9853	25.4973	28.776	25.4798	28.5842	25.445	28.3923	25.3752	28.2005	25.288	28.0261	25.2008	27.8342	25.1136	27.6598	25.0264	27.468	24.9218	27.311	24.8171	27.1366	24.695	26.9797	24.573	26.8227	24.4334	26.7006	24.2765	26.596
Eliza_20170208_SA55698	49.8746	9.64278	49.4282	9.89278	47.6603	10.2321	47.4103	10.1071	47.2318	9.92849	49.7675	8.62493	49.321	8.49993	47.5175	8.33922	47.2496	8.53565	47.1425	8.74993	50.5889	9.57135	50.4639	9.74992	50.2853	9.87492	50.1067	9.98206	49.8925	10.0535	49.696	10.1071	49.4817	10.1428	49.2675	10.1785	49.0532	10.2321	48.8389	10.2856	48.6246	10.3035	48.4103	10.3213	48.196	10.3392	47.9818	10.3392	47.7675
Eliza_20171117_SA56849	36.548	16.1438	36.3719	16.6543	34.9107	18.3796	34.6114	18.4148	34.3297	18.4148	35.7558	15.2283	35.2276	15.4396	33.3439	16.6719	33.2558	16.9536	33.3615	17.2001	37.1465	15.5628	37.1289	15.8269	37.0409	16.0734	36.9529	16.3022	36.8473	16.5487	36.7064	16.76	36.5304	16.9536	36.3719	17.1473	36.1959	17.3409	36.0374	17.5522	35.8438	17.7282	35.6501	17.9043	35.4741	18.0803	35.2628	18.2388	35.0339
Eliza_20141016_SA50792	29.2262	9.75813	28.7278	9.85459	26.7022	9.7099	26.4932	9.50092	26.3807	9.27585	29.4512	8.71319	29.0654	8.3756	27.1524	7.6361	26.9112	7.7004	26.7022	7.92547	29.8692	9.93497	29.6763	10.0314	29.4512	10.0797	29.2262	10.1118	29.0011	10.1279	28.776	10.1279	28.551	10.1118	28.3259	10.1118	28.1008	10.0957	27.8758	10.0797	27.6507	10.0314	27.4417	9.99927	27.2167	9.95104	27.0077	9.87066	26.7987
Eliza_20170911_SA56391	25.6234	31.0918	25.1546	31.4042	23.1756	31.7688	22.8805	31.682	22.811	31.4737	25.5366	30.0502	25.0158	29.8592	22.9846	29.7724	22.7763	29.9286	22.6201	30.1196	26.283	31.057	26.1268	31.2133	25.9185	31.3174	25.7275	31.4216	25.5192	31.5084	25.2935	31.5605	25.0852	31.6126	24.8595	31.6473	24.6512	31.7167	24.4255	31.7688	24.1998	31.8209	23.9742	31.8382	23.7658	31.8556	23.5402	31.8382	23.3145
Eliza_20160307_SA54260	16.8939	19.6734	16.7134	20.1427	15.5943	21.7129	15.3056	21.7851	15.089	21.7851	16.1178	18.9515	15.6846	19.1861	14.2046	20.3954	14.1504	20.63	14.1504	20.8105	17.327	19.168	17.327	19.3846	17.2909	19.6012	17.2187	19.8178	17.1105	19.9983	16.9841	20.1788	16.8578	20.3593	16.7314	20.5398	16.6231	20.7203	16.4968	20.9007	16.3524	21.0812	16.208	21.2437	16.0636	21.4061	15.9012	21.5505	15.7026
Eliza_20170913_SA56487	43.4715	31.5399	42.9751	31.8767	40.6171	32.0718	40.4398	31.9299	40.298	31.6995	43.4715	30.2989	42.9751	29.9797	40.7235	29.6252	40.564	29.7493	40.3512	29.9975	44.2161	31.469	44.0388	31.664	43.8261	31.8058	43.5956	31.9477	43.3651	32.0363	43.1169	32.1072	42.851	32.1781	42.6028	32.2136	42.3369	32.2491	42.0709	32.2668	41.8227	32.2668	41.5568	32.2668	41.2908	32.2668	41.0426	32.2313	40.7944
Eliza_20141016_SA50747	24.0698	25.6031	23.6226	26.0503	21.658	26.9607	21.2587	26.8649	21.0511	26.7052	23.7663	24.4212	23.1754	24.3413	20.9233	24.7406	20.6837	24.9163	20.6518	25.092	24.8205	25.4594	24.6767	25.667	24.501	25.8267	24.3254	25.9864	24.1017	26.1142	23.8941	26.226	23.6705	26.3219	23.4469	26.4337	23.2233	26.5455	22.9997	26.6413	22.7761	26.7371	22.5365	26.801	22.2969	26.8489	22.0573	26.8968	21.8178
Eliza_20141013_SA50436	43.9288	7.91323	44.1199	8.50235	44.295	12.5306	43.9447	12.9287	43.5785	13.1993	41.9863	7.49926	41.5087	8.07245	40.2986	11.846	40.6807	12.2599	41.0628	12.6261	43.8651	6.44841	44.088	6.81462	44.2472	7.21267	44.3428	7.64256	44.4224	8.07245	44.4542	8.50235	44.502	8.93224	44.5498	9.36214	44.5179	9.79203	44.5657	10.2219	44.5975	10.6518	44.5975	11.0817	44.5657	11.5275	44.5179	11.9574	44.3587
Eliza_20141014_SA50482	52.8257	9.63358	52.6191	10.3807	49.5986	12.8925	49.0422	12.8766	48.613	12.813	51.8242	8.01209	51.0294	8.07568	47.2936	9.47461	47.0074	9.91973	46.8485	10.3807	53.9703	8.90232	53.9067	9.31564	53.716	9.69717	53.4934	10.0628	53.255	10.4284	52.9688	10.7305	52.6827	11.0484	52.3647	11.3505	52.0309	11.6207	51.7447	11.9228	51.3791	12.1612	51.0294	12.3997	50.6796	12.6381	50.2981	12.8289	49.8689
Eliza_20141014_SA50507	36.3545	5.12937	35.9841	5.64567	33.1781	7.2956	32.6731	7.2507	32.2017	7.02622	35.8382	3.59168	35.2097	3.4121	32.0445	3.87228	31.7415	4.24267	31.4945	4.64674	37.3871	4.59062	37.2637	4.92734	37.0168	5.18549	36.7698	5.44364	36.5004	5.66812	36.2086	5.88138	35.9168	6.08341	35.6138	6.27422	35.3219	6.46502	35.0077	6.64461	34.6934	6.81297	34.3679	6.95888	34.0424	7.09357	33.6944	7.18336	33.3465
Eliza_20141014_SA50545	42.7089	10.5542	42.2169	11.316	38.9633	14.2045	38.4078	14.2204	37.8841	13.9665	41.709	8.85602	40.8202	8.90363	36.6303	10.4272	36.3128	10.9192	36.2494	11.5382	43.7881	9.77654	43.677	10.2209	43.4865	10.6494	43.2485	11.0462	42.9469	11.3954	42.6136	11.7128	42.2645	12.0143	41.9153	12.3318	41.5503	12.6174	41.2011	12.919	40.8678	13.2364	40.4869	13.5221	40.1219	13.7919	39.7092	13.9982	39.249
Eliza_20141015_SA50604	59.1499	15.267	58.5839	15.6129	54.9047	16.006	54.3387	15.7702	54.0242	15.3456	59.2757	13.4903	58.7254	13.0973	55.0148	12.3426	54.5116	12.6098	54.1186	13.0658	60.5335	15.1884	60.2348	15.4557	59.8889	15.6758	59.5273	15.8488	59.1342	15.9903	58.7411	16.0689	58.3323	16.1161	57.9393	16.1632	57.5305	16.1947	57.1217	16.2261	56.7129	16.2419	56.3041	16.2576	55.911	16.2576	55.5022	16.2104	55.1248
Eliza_20141016_SA50765	54.1451	8.58063	53.516	9.03224	49.5967	9.64514	48.9838	9.25805	48.4676	8.82256	54.1612	6.62902	53.4031	6.24192	49.5805	5.48386	48.887	5.62902	48.4838	6.03225	55.5644	8.61289	55.2741	8.93547	54.9354	9.19353	54.5321	9.35482	54.1128	9.49998	53.7096	9.61288	53.2741	9.70966	52.8709	9.82256	52.4515	9.93546	52.016	9.99998	51.5805	10.0161	51.1451	10.0161	50.7257	9.99998	50.2902	9.91934	49.9031
UpperBarton_20141210_SA51428	41.4727	23.8688	41.0812	24.4562	37.8671	26.6261	37.3287	26.6424	37.0187	26.5119	40.6896	22.2373	40.0207	22.1558	36.2682	23.2815	35.9583	23.6894	35.7951	24.1299	42.6148	23.1184	42.4843	23.5262	42.2559	23.8688	41.9948	24.2115	41.7011	24.5214	41.3748	24.7825	41.0485	25.0435	40.7386	25.3209	40.3959	25.5819	40.0533	25.8266	39.6944	26.0387	39.3192	26.2508	38.9439	26.4629	38.536	26.5282	38.1118
Eliza_20160524_SA54366	41.6139	16.0822	40.8325	15.955	37.9613	13.9924	37.7614	13.5018	37.8159	13.0293	42.8314	14.8284	42.5043	14.1378	40.4327	11.3575	39.9784	11.2848	39.5241	11.2666	42.5225	16.9363	42.1409	16.9181	41.7593	16.8273	41.3958	16.7001	41.0505	16.5547	40.7053	16.373	40.36	16.2094	40.0329	15.9914	39.724	15.7733	39.4332	15.5189	39.1243	15.3008	38.8336	15.0646	38.5246	14.8284	38.2521	14.5376	38.1067
Eliza_20160705_SA54588	41.381	58.1186	40.4368	58.2482	36.6227	57.1003	36.2339	56.7485	36.0117	56.4152	42.0846	56.5448	41.7143	55.7302	38.3261	53.4343	37.8447	53.3787	37.4744	53.5639	42.3623	58.7111	41.955	58.7851	41.5291	58.7851	41.1033	58.7666	40.696	58.7111	40.2886	58.6185	39.8813	58.5444	39.474	58.3963	39.0852	58.2482	38.6964	58.1186	38.289	58.0075	37.8817	57.8779	37.5114	57.7113	37.1411	57.5076	36.8263
Eliza_20160705_SA54621	45.8732	44.3277	45.4186	44.8368	42.2368	46.1096	41.8913	46.0005	41.7095	45.855	45.455	42.7822	44.8368	42.5641	41.4913	42.9641	41.2004	43.1823	41.0004	43.5641	47.1277	43.9823	46.9277	44.3095	46.6732	44.5823	46.3641	44.8186	46.055	45.0368	45.7095	45.2186	45.3641	45.3823	45.0186	45.5641	44.655	45.6914	44.3095	45.8186	43.9277	45.9277	43.5641	46.0368	43.2004	46.1459	42.8186	46.1459	42.4368
Eliza_20160826_SA55023	55.6276	26.0973	54.9095	26.7104	51.0913	27.8138	50.5833	27.6562	50.2505	27.3584	55.3649	24.3283	54.5417	23.8729	50.4782	23.6277	49.9878	23.908	49.655	24.3634	56.8887	25.9747	56.6085	26.29	56.2582	26.5352	55.8904	26.7454	55.505	26.9381	55.1197	27.1132	54.7169	27.2358	54.314	27.3759	53.8937	27.4986	53.4908	27.6036	53.088	27.7262	52.6676	27.8313	52.2472	27.9014	51.8269	27.9364	51.4065
Eliza_20160711_SA54683	39.4193	28.5987	39.0165	28.9648	35.8673	29.8437	35.5927	29.6972	35.4279	29.4043	39.1813	27.2621	38.632	27.2255	35.5927	27.2804	35.2814	27.5184	35.1716	27.7748	40.5727	28.5071	40.2981	28.7268	40.0235	28.9282	39.7305	29.093	39.4193	29.2578	39.108	29.4043	38.7785	29.5141	38.4489	29.6423	38.1193	29.7338	37.7898	29.8254	37.4419	29.8986	37.1123	29.9718	36.7645	30.0085	36.4166	29.9901	36.087
Eliza_20160711_SA54704	40.8025	38.9777	40.2551	39.4704	36.496	40.7295	35.9121	40.5288	35.6566	40.2368	40.5836	37.1529	39.8901	36.8792	35.9121	36.788	35.4741	37.1712	35.2734	37.5909	42.1894	38.5945	41.9157	38.9412	41.6054	39.2332	41.2405	39.4887	40.8573	39.6894	40.4741	39.8901	40.0726	40.0544	39.6712	40.2186	39.2514	40.3463	38.8317	40.4558	38.412	40.5653	37.9923	40.6748	37.5726	40.766	37.1347	40.8025	36.6967
Eliza_20160826_SA55028	35.951	11.8601	35.598	12.6367	31.7858	15.1958	31.1505	15.0722	30.6563	14.8075	35.0509	9.97169	34.0979	9.86579	29.7739	10.96	29.4738	11.4013	29.2973	11.966	37.2923	11.2071	37.1511	11.666	36.8864	12.0896	36.604	12.4778	36.2687	12.8308	35.8981	13.1485	35.5274	13.4662	35.1568	13.7839	34.7509	14.0663	34.345	14.3133	33.9214	14.5604	33.4802	14.7899	33.0389	14.984	32.5624	15.1075	32.0859
Eliza_20170210_SA55850	63.3388	39.0533	62.8209	39.6247	58.6424	40.714	58.1781	40.4818	57.7674	40.1425	63.1959	37.0176	62.4995	36.5711	58.1424	36.089	57.696	36.339	57.3924	36.7854	64.8209	38.964	64.4995	39.3033	64.1423	39.589	63.7495	39.839	63.3209	40.0175	62.8924	40.1961	62.4459	40.339	61.9995	40.464	61.5709	40.589	61.1245	40.714	60.6602	40.8032	60.1959	40.8747	59.7495	40.9461	59.2852	40.9104	58.8388
Eliza_20170913_SA56446	58.1901	44.2259	57.2253	44.5943	53.4009	43.8224	53.0149	43.454	52.6816	43.1207	58.6989	42.6119	58.1024	41.8401	54.664	40.1384	54.1202	40.1735	53.5939	40.3138	59.6813	44.5943	59.2778	44.7873	58.8392	44.8925	58.4006	44.9627	57.9445	44.9978	57.506	44.9627	57.0498	44.9276	56.6113	44.875	56.1551	44.8048	55.7166	44.7171	55.278	44.6118	54.857	44.4715	54.4359	44.3136	54.0149	44.1557	53.629
Eliza_20171114_SA56786	34.3716	54.6497	33.5006	54.4755	29.2673	52.4721	29.0931	51.8449	29.0931	51.2003	35.8698	52.594	35.5737	51.8972	32.4553	48.1865	31.8107	48.1865	31.2881	48.2562	35.8698	55.5556	35.3472	55.6078	34.842	55.5904	34.3194	55.5033	33.8142	55.3988	33.3264	55.2071	32.856	54.9981	32.3682	54.8065	31.8979	54.5974	31.4449	54.3535	31.0094	54.0748	30.5564	53.796	30.1383	53.4999	29.7725	53.1341	29.4938
Eliza_20170906_SA56373	66.5352	28.3748	65.7138	28.4105	62.3745	26.9284	62.1066	26.4462	61.9638	25.9998	67.428	26.9998	67.2137	26.3034	64.4638	23.6248	63.9638	23.5534	63.4638	23.607	67.6066	29.0891	67.1959	29.1426	66.7852	29.1426	66.3923	29.0891	65.9816	28.9998	65.5888	28.8926	65.1959	28.7676	64.8209	28.6069	64.4459	28.4462	64.0888	28.2676	63.7316	28.0712	63.3745	27.8748	63.0174	27.6605	62.7316	27.3748	62.4995
OldMill_20160811_SA12002	41.5778	7.72002	41.3756	8.40012	38.8207	11.6352	38.159	11.9293	37.534	12.0396	40.236	6.32306	39.464	6.47011	35.8797	8.58393	35.6408	9.20888	35.604	9.70517	42.6623	6.56202	42.6439	7.00316	42.4969	7.42592	42.3314	7.83031	42.1476	8.23469	41.9271	8.60231	41.6513	8.95155	41.3756	9.31917	41.1183	9.66841	40.8426	10.0176	40.5485	10.3301	40.236	10.6426	39.9235	10.9735	39.5927	11.2676	39.2067
OldMill_20161108_SA55531	51.0125	11.601	50.5321	12.0992	47.2404	13.754	46.8668	13.7006	46.4397	13.5227	50.5143	9.99967	49.8026	9.78615	46.1906	10.231	45.8348	10.6046	45.6213	11.0317	52.0979	11.1562	51.9022	11.4943	51.5997	11.7256	51.3506	12.0281	51.0481	12.2416	50.7278	12.4551	50.3898	12.6686	50.0695	12.8643	49.7314	13.0423	49.3756	13.2202	49.0197	13.3625	48.6639	13.5227	48.308	13.6472	47.9343	13.7362	47.5429
OldMill_20170216_SA56075	25.0469	16.852	24.6926	17.3603	22.0277	19.7787	21.504	19.8404	21.1651	19.7325	24.1073	15.2962	23.4141	15.2962	20.1176	16.7904	19.8866	17.2525	19.8404	17.6068	26.079	15.9431	25.9865	16.3282	25.7247	16.6209	25.5398	16.9752	25.3396	17.3141	25.0931	17.6376	24.8004	17.884	24.5078	18.1767	24.1843	18.4078	23.8916	18.6696	23.5681	18.9007	23.26	19.1472	22.9366	19.3782	22.5823	19.5631	22.2126
OldMill_20170216_SA56078	52.2012	27.9308	51.3259	27.9627	47.2835	25.9733	46.997	25.3844	47.0288	24.8274	53.4585	26.403	53.2834	25.6709	50.1641	22.281	49.5911	22.2014	49.0023	22.3287	53.5062	28.7107	53.0288	28.7743	52.5513	28.7266	52.0898	28.647	51.6123	28.5356	51.1667	28.3605	50.737	28.1855	50.2755	28.0263	49.8617	27.7876	49.4638	27.5329	49.0341	27.3261	48.6044	27.1032	48.1747	26.8804	47.8087	26.5781	47.5063
OldMill_20170216_SA56080	50.067	18.7086	49.7731	19.3383	46.6387	22.2769	46.0929	22.4028	45.4633	22.2908	49.0035	17.0994	48.1639	17.0715	44.3858	18.6527	44.036	19.2544	43.8681	19.7861	51.3123	17.7291	51.2424	18.1909	51.0465	18.6107	50.8506	19.0305	50.5707	19.4083	50.2629	19.7581	49.941	20.066	49.6052	20.4018	49.2554	20.7096	48.8915	21.0035	48.5277	21.2973	48.1359	21.5632	47.7581	21.8291	47.3663	22.067	46.9185
OldMill_20170823_SA56277	56.6122	24.4699	56.3996	25.0192	53.3873	28.2441	52.7495	28.3504	52.2533	28.2795	55.3542	22.8398	54.7871	23.0701	50.8004	24.7357	50.5346	25.3027	50.7118	25.728	57.7108	23.3005	57.6753	23.7612	57.4804	24.1687	57.2501	24.5763	57.0197	24.9661	56.7362	25.3205	56.435	25.6748	56.1692	26.0469	55.8326	26.3482	55.4782	26.6671	55.1415	26.9683	54.7871	27.2518	54.4328	27.553	54.0784	27.8543	53.6886
OldMill_20160525038	63.4795	34.9162	62.9175	35.185	59.2769	35.4782	58.7882	35.1361	58.4217	34.794	63.675	32.9859	63.0886	32.766	59.6678	31.8131	59.0814	31.8864	58.6416	32.204	64.9456	34.9895	64.6279	35.2338	64.2859	35.4782	63.9193	35.6248	63.5284	35.6981	63.1375	35.7469	62.7221	35.7958	62.3311	35.8202	61.9158	35.8691	61.5248	35.8935	61.1339	35.8447	60.7185	35.8202	60.3275	35.7958	59.9122	35.7225	59.5457
UpperBarton_20131204_SA16131	40.3942	56.734	39.3678	56.734	35.2456	54.7143	34.9642	54.0852	34.9145	53.5885	41.4868	55.0454	41.1226	54.1349	37.9275	50.9232	37.1825	50.8901	36.6197	50.9894	41.851	57.5121	41.3709	57.6611	40.8577	57.6611	40.3611	57.5783	39.8644	57.479	39.4009	57.2803	38.9374	57.0651	38.4738	56.8499	38.0103	56.6347	37.5633	56.4029	37.1329	56.138	36.6859	55.8731	36.2555	55.6248	35.8581	55.2937	35.5105
UpperBarton_20131204_SA16132	44.7082	65.153	43.9719	65.6153	39.4171	65.9236	38.8007	65.5982	38.4069	65.1701	44.8794	63.064	44.3828	62.4305	39.7254	61.3346	39.2459	61.6599	38.7665	62.0538	46.2321	64.9818	45.8725	65.3242	45.4444	65.5982	45.0164	65.8379	44.5369	65.9749	44.0575	66.0777	43.5609	66.129	43.0643	66.1633	42.5678	66.1633	42.0712	66.2146	41.5746	66.2146	41.0781	66.2489	40.5815	66.2489	40.0849	66.1633	39.6226
UpperBarton_20140317_SA16975	55.8974	22.9794	55.2644	23.2326	51.3395	22.8844	50.9281	22.4887	50.6432	22.0614	56.4513	21.286	56.0557	20.6055	52.5107	18.8804	51.8776	19.0545	51.3237	19.2761	57.1793	23.1693	56.8312	23.3908	56.4197	23.4858	56.0082	23.5491	55.5967	23.5807	55.1853	23.5966	54.758	23.5966	54.3465	23.5649	53.935	23.5016	53.5235	23.4383	53.1121	23.3592	52.7006	23.3117	52.2891	23.2326	51.9093	23.106	51.5295
UpperBarton_20140317_SA16976	48.6227	20.5315	47.7719	20.3362	45.1497	18.23	44.9684	17.7976	44.8428	17.1839	49.7804	19.4017	49.7525	18.5648	47.6882	15.7752	47.2	15.566	46.6421	15.566	49.4596	21.2568	49.083	21.2707	48.7343	21.1591	48.3996	21.0196	48.0509	20.8662	47.744	20.657	47.4371	20.4478	47.1442	20.2246	46.8653	19.9735	46.5863	19.7504	46.3074	19.4993	46.0284	19.2622	45.7494	19.0111	45.4984	18.7461	45.3031
UpperBarton_20140317_SA16978	50.2362	20.6272	49.6128	21.0805	46.0711	21.7747	45.7169	21.5905	45.4619	21.2647	50.1512	19.0546	49.5137	18.6721	46.0286	18.3321	45.7027	18.5304	45.3769	18.8279	51.4687	20.443	51.1995	20.7263	50.8737	20.953	50.5195	21.1372	50.1653	21.293	49.7828	21.4347	49.4003	21.548	49.0178	21.633	48.6353	21.7038	48.2386	21.7605	47.8561	21.8313	47.4594	21.8738	47.0628	21.9163	46.6661	21.888	46.2836
UpperBarton_20140317_SA17009	76.3085	31.7899	75.7404	32.4632	70.6279	33.6624	69.8705	33.4099	69.0079	32.926	76.4136	29.5598	75.8456	29.0969	70.7962	27.7715	70.144	28.1291	69.3025	28.5289	77.9495	31.6637	77.6339	32.0845	77.2131	32.4001	76.7713	32.6736	76.2664	32.884	75.8035	33.0943	75.2775	33.2416	74.7726	33.3468	74.2466	33.431	73.7207	33.5362	73.1947	33.6203	72.6687	33.6624	72.1427	33.7045	71.6168	33.7045	71.0908
UpperBarton_20140317_SA17017	29.4101	28.8153	28.7997	29.3945	26.3893	31.2101	25.9823	31.2257	25.5284	31.0536	28.784	27.2345	28.0327	27.1249	24.7771	27.9545	24.4797	28.3614	24.4328	28.8153	30.4275	28.064	30.3649	28.424	30.2084	28.7684	29.9736	29.0658	29.7231	29.3475	29.4727	29.6136	29.144	29.8014	28.8153	29.9736	28.5179	30.1927	28.2049	30.3962	27.8919	30.6153	27.5632	30.7875	27.2658	30.991	26.9058	31.1005	26.5458
UpperBarton_20140317_SA17019	42.3258	21.6856	41.7284	22.0889	38.5622	22.4324	38.2336	22.2382	38.0394	21.9395	42.2959	20.3265	41.7433	19.8337	38.6219	19.4155	38.3232	19.5798	38.0096	19.9084	43.2667	21.6259	43.0128	21.8499	42.7141	21.9993	42.4005	22.1635	42.0868	22.283	41.7583	22.3577	41.4148	22.4174	41.0862	22.4622	40.7427	22.4772	40.3992	22.5369	40.0706	22.5668	39.7271	22.6116	39.3836	22.6415	39.07	22.5369	38.7414
UpperBarton_20140317_SA17024	47.2518	20.2528	46.618	20.5486	43.097	20.8725	42.7449	20.5908	42.4773	20.2669	47.3927	18.5345	46.7589	18.0979	43.4351	17.1121	42.9421	17.2952	42.6745	17.6473	48.4349	20.2105	48.1673	20.4922	47.8433	20.6894	47.4912	20.8302	47.1251	20.957	46.7448	21.0415	46.3645	21.0837	45.9843	21.126	45.604	21.1683	45.2237	21.1964	44.8294	21.2105	44.4491	21.1542	44.0688	21.1401	43.6886	21.0837	43.3506
UpperBarton_20140317_SA17025	49.4539	19.4167	48.7243	19.8626	44.9274	19.687	44.5896	19.2951	44.3599	18.8357	49.9133	17.8358	49.3458	17.3224	45.7246	15.9171	45.3868	16.0793	44.995	16.309	50.7105	19.5113	50.3998	19.7816	50.0079	19.9167	49.6026	20.0518	49.1972	20.0923	48.7783	20.1329	48.3594	20.1464	47.9541	20.1599	47.5352	20.1329	47.1163	20.1194	46.6975	20.0788	46.2921	20.0518	45.8732	19.9978	45.4814	19.8626	45.1031
UpperBarton_20140317_SA17028	44.7761	18.6353	44.2196	19.3488	40.9948	20.8042	40.4526	20.7614	40.0674	20.5474	44.2767	17.0657	43.392	16.8517	39.839	17.5937	39.4823	17.8933	39.3824	18.3071	45.8891	17.9789	45.7464	18.3642	45.4896	18.6639	45.1899	18.9635	44.9045	19.2489	44.5478	19.4486	44.2196	19.677	43.8486	19.8482	43.4919	20.0479	43.1352	20.2334	42.7499	20.3904	42.3789	20.5331	41.9937	20.6758	41.5941	20.7899	41.1946
UpperBarton_20140630_SA18197	50.2286	22.0978	49.5928	22.4792	45.3965	22.2673	45.0433	21.9	44.7889	21.4196	50.6807	20.4164	50.1862	19.8089	46.5833	18.2405	46.0464	18.3818	45.6084	18.6644	51.585	22.1401	51.2459	22.4086	50.8361	22.5781	50.4264	22.7194	49.9884	22.7759	49.5504	22.8325	49.0983	22.8183	48.6603	22.8466	48.2223	22.8042	47.7843	22.7618	47.3463	22.7194	46.9083	22.6488	46.4703	22.6205	46.0464	22.4934	45.6367
UpperBarton_20140630_SA18198	44.5312	18.0784	44.1088	18.563	41.0895	19.8055	40.7043	19.7682	40.3067	19.5818	44.1709	16.5874	43.4751	16.1774	40.2446	16.575	39.934	16.7862	39.6358	17.2335	45.4258	17.6435	45.2767	17.9541	45.053	18.2275	44.7921	18.4636	44.5188	18.6748	44.2206	18.8611	43.9224	19.0475	43.6118	19.1966	43.2887	19.3457	42.9781	19.4948	42.655	19.6439	42.332	19.7682	42.0089	19.8924	41.6486	19.9173	41.3131
UpperBarton_20140630_SA18201	53.9598	21.9127	53.2661	22.2746	49.526	22.3802	48.968	22.0937	48.7569	21.596	54.2313	20.1331	53.6733	19.6053	50.0086	18.4742	49.3903	18.5949	48.9228	19.0925	55.4227	21.9579	55.0909	22.2143	54.7139	22.3953	54.3218	22.531	53.9146	22.6517	53.5074	22.6969	53.0851	22.712	52.6629	22.7271	52.2406	22.7421	51.8183	22.7271	51.4111	22.7421	50.9889	22.712	50.5666	22.6818	50.1594	22.6215	49.7673
UpperBarton_20140630_SA18202	53.2712	21.5882	52.8385	22.2228	48.368	23.8812	47.9498	23.6649	47.647	23.2899	52.9395	19.4972	52.3627	19.0501	47.5893	19.0357	47.1855	19.4828	46.9692	19.9731	54.67	21.1412	54.3816	21.5306	54.0066	21.8478	53.6317	22.1362	53.2135	22.4102	52.7809	22.6265	52.3482	22.8429	51.9012	23.0448	51.4541	23.2178	50.9927	23.3764	50.5312	23.5495	50.0697	23.7225	49.6082	23.8668	49.1323	23.8956	48.642
UpperBarton_20140630_SA18203	48.5324	19.2454	47.7755	19.2318	44.2616	17.9749	43.8832	17.4073	43.8832	16.9748	49.4784	17.7452	49.1946	17.0424	46.2618	14.6773	45.5996	14.5421	44.9914	14.6638	49.8433	19.7995	49.4379	19.9211	49.0189	19.9617	48.5999	19.9481	48.1945	19.8806	47.789	19.786	47.3836	19.6508	47.0052	19.4616	46.6132	19.3265	46.2213	19.1913	45.8429	19.0021	45.4645	18.8129	45.0996	18.6237	44.7482	18.3939	44.4238
UpperBarton_20140630_SA18204	45.0124	18.1129	44.3958	18.4469	40.5034	18.5239	39.8611	18.1514	39.6299	17.7789	45.295	16.3016	44.6655	15.6464	40.8246	14.8371	40.2979	14.9527	39.9511	15.2354	46.5411	17.9844	46.2328	18.2927	45.8731	18.5368	45.462	18.6781	45.0381	18.8065	44.6013	18.8451	44.1645	18.8322	43.7278	18.8451	43.291	18.8322	42.8543	18.8322	42.4175	18.8322	41.9807	18.8322	41.544	18.8194	41.12	18.7038	40.709
UpperBarton_20140630_SA18205	51.091	20.8027	50.5306	21.2264	46.6489	22.4292	45.9245	22.1968	45.5008	21.8005	50.8996	18.8618	50.2436	18.4655	46.0748	18.1921	45.5008	18.5885	45.2274	19.0122	52.3894	20.461	52.1298	20.8027	51.8154	21.1034	51.46	21.3357	51.091	21.5544	50.6809	21.6911	50.2709	21.8141	49.8472	21.9235	49.4372	22.0738	49.0408	22.2105	48.6171	22.2788	48.1797	22.3198	47.7697	22.4429	47.3323	22.4565	46.9086
UpperBarton_20140630_SA18206	23.2751	47.8318	22.5502	47.767	19.5987	45.5535	19.4046	45.1651	19.4046	44.6085	24.4531	46.7185	24.4013	46.0195	22.1877	43.1457	21.6958	43.0033	21.1262	43.0421	24.1683	48.492	23.78	48.5438	23.4175	48.4402	23.055	48.3107	22.7055	48.1554	22.356	47.9742	22.0194	47.7929	21.6958	47.5729	21.3981	47.3269	21.0874	47.1069	20.7897	46.8738	20.4919	46.6279	20.1554	46.4208	19.9353	46.1101	19.7411
UpperBarton_20140930_SA50413	19.9814	21.3125	20.5562	20.8134	23.8083	19.7999	24.247	19.9209	24.61	20.2386	20.284	22.81	20.9798	23.052	24.368	22.9915	24.6705	22.7798	24.8974	22.3865	18.8924	21.6151	19.0739	21.2974	19.3462	21.0403	19.6487	20.8134	19.9512	20.6167	20.2991	20.4655	20.647	20.3747	20.9798	20.2083	21.3428	20.1176	21.6907	19.9966	22.0386	19.8907	22.4016	19.8151	22.7646	19.7394	23.1428	19.7092	23.5058
UpperBarton_20141210_SA51404	66.6539	31.7532	66.1458	32.4745	63.1622	35.0482	62.5393	35.0974	62.0475	34.9171	65.7195	30.1631	64.8507	30.2123	61.0803	31.6713	60.7852	32.1467	60.7361	32.6712	67.7523	30.9008	67.6539	31.327	67.49	31.7368	67.2441	32.1303	66.949	32.4581	66.6212	32.7532	66.2769	33.0319	65.9326	33.3106	65.572	33.5729	65.2605	33.8679	64.8835	34.1302	64.5228	34.3925	64.195	34.6712	63.7852	34.8515	63.3589
UpperBarton_20141210_SA51405	39.8174	35.9141	39.2295	36.159	34.9015	35.6201	34.4769	35.2608	34.3299	34.7055	40.3564	34.1175	39.8827	33.5133	36.0937	31.7331	35.5874	31.9127	35.1955	32.272	41.2056	36.0774	40.8137	36.306	40.389	36.4367	39.9481	36.5347	39.4908	36.5837	39.0498	36.5673	38.5925	36.551	38.1516	36.5184	37.6943	36.4694	37.2533	36.404	36.8123	36.3224	36.3714	36.208	35.9304	36.159	35.5058	36.0121	35.1138
UpperBarton_20141210_SA51407	54.3225	10.6451	53.5483	10.9516	49.3225	10.9355	48.6935	10.629	48.3547	10.1935	54.6128	8.64514	54.0322	8.11289	49.8547	6.79031	49.2741	6.96773	48.9193	7.35482	55.9354	10.5806	55.5805	10.9032	55.1451	11.0968	54.6934	11.2258	54.2257	11.3064	53.7418	11.3548	53.2741	11.4032	52.7902	11.4193	52.3225	11.3871	51.8386	11.3709	51.3709	11.3387	50.887	11.3064	50.4193	11.2903	49.9515	11.2419	49.516
UpperBarton_20141210_SA51408	49.255	28.9154	48.4459	29.2714	44.1903	29.4818	43.5754	29.1743	43.2195	28.6889	49.4491	26.9737	48.9475	26.3427	44.7566	25.0482	44.0932	25.2585	43.624	25.6145	50.7598	28.8993	50.42	29.2229	49.9993	29.4332	49.5786	29.6436	49.1093	29.7569	48.6563	29.8216	48.1708	29.8216	47.7016	29.8378	47.2323	29.8216	46.7631	29.8378	46.2938	29.8054	45.8246	29.7569	45.3392	29.7407	44.8861	29.676	44.4492
UpperBarton_20141210_SA51414	43.2573	25.7861	42.5132	26.0773	38.7763	25.3332	38.388	25.042	38.3557	24.6537	43.7588	24.3464	43.3705	23.667	39.941	21.8551	39.391	21.8875	38.938	22.1463	44.422	26.2229	44.0823	26.4494	43.6779	26.5465	43.2735	26.5465	42.8691	26.5465	42.4646	26.5141	42.0602	26.4332	41.6558	26.4009	41.2675	26.2714	40.8631	26.2067	40.4587	26.1097	40.0866	25.9479	39.6984	25.8185	39.3263	25.6567	38.9866
UpperBarton_20141210_SA51416	28.1563	22.4529	27.8121	23.2068	25.0096	25.9438	24.436	26.0257	23.8788	25.8946	27.091	20.9943	26.2224	21.0435	22.6988	22.6824	22.4693	23.1577	22.3546	23.6657	29.2052	21.5679	29.1888	21.994	29.0085	22.3874	28.7791	22.7479	28.5332	23.0921	28.2546	23.4363	27.9432	23.7313	27.6646	24.0427	27.3532	24.3541	27.0419	24.6327	26.6977	24.9113	26.3535	25.1571	26.0257	25.4521	25.6652	25.6652	25.2554
UpperBarton_20141210_SA51419	39.7709	60.2731	38.8618	60.2569	35.0957	58.5362	34.8198	58.0492	34.7711	57.5298	40.8909	58.6823	40.615	57.8706	37.4495	54.9649	36.8814	54.9325	36.3944	55.111	41.0695	60.9062	40.6312	61.0523	40.1767	61.0198	39.7222	60.9874	39.2839	60.8575	38.8456	60.6952	38.4235	60.5166	37.9852	60.4192	37.5632	60.2244	37.1411	60.0134	36.7515	59.7861	36.3619	59.5426	35.9561	59.3154	35.5827	59.0557	35.2743
UpperBarton_20141210_SA51420	50.6239	21.7758	50.262	22.4173	47.5812	24.7363	47.0055	24.8843	46.5615	24.835	49.7357	20.4436	48.9956	20.4272	45.7062	22.0225	45.5088	22.4995	45.4266	22.8942	51.5613	20.8219	51.5449	21.2331	51.4133	21.5949	51.1995	21.9403	50.9693	22.2857	50.7061	22.5817	50.4101	22.8284	50.0976	23.0916	49.7686	23.3383	49.4726	23.6179	49.1601	23.8482	48.8311	24.0949	48.5022	24.3251	48.1568	24.5389	47.795
UpperBarton_20141210_SA51424	56.1662	42.7253	55.4195	43.2609	51.4424	43.5856	50.9229	43.2772	50.647	42.9038	56.3285	40.8909	55.7117	40.3715	51.6372	39.5274	51.069	39.7546	50.8255	40.128	57.5622	42.709	57.2376	43.0174	56.8642	43.2447	56.4421	43.407	56.0201	43.5207	55.5818	43.6181	55.1435	43.6505	54.7052	43.6992	54.2669	43.7479	53.8286	43.7804	53.3903	43.7966	52.9358	43.7804	52.4975	43.7804	52.0592	43.7317	51.6372
UpperBarton_20141210_SA51425	50.8255	6.57914	50.5812	7.24683	47.5848	9.80357	47.1288	9.85243	46.6402	9.73843	49.8484	5.22748	49.0016	5.12978	45.6306	6.64428	45.4189	7.0514	45.3049	7.44224	51.6886	5.6509	51.6397	6.0743	51.4606	6.44886	51.2326	6.80713	51.0046	7.14912	50.7441	7.4911	50.4835	7.8168	50.2067	8.12622	49.8647	8.38678	49.5553	8.64733	49.2133	8.90789	48.855	9.13589	48.5293	9.39644	48.171	9.60815	47.7802
UpperBarton_20141210_SA51429	43.0465	28.2091	42.7208	28.7466	39.8869	30.4241	39.382	30.4567	38.9748	30.3427	42.4439	26.6944	41.7762	26.6455	38.5676	27.5576	38.1767	27.9159	38.0627	28.2742	44.1703	27.4599	44.0889	27.8345	43.8935	28.1439	43.6492	28.4371	43.3723	28.6977	43.0954	28.942	42.7859	29.1537	42.4602	29.3655	42.1345	29.5446	41.825	29.7563	41.4993	29.9355	41.1572	30.0821	40.7989	30.2287	40.4406	30.3264	40.066
UpperBarton_20150213_SA51874	54.7722	19.6566	53.9532	19.7078	49.4998	17.865	49.1926	17.3019	49.0049	16.7729	56.052	17.5749	55.8301	17.0289	52.0251	13.6675	51.2914	13.5992	50.6942	13.6845	56.3079	20.305	55.8131	20.4415	55.3012	20.4244	54.7893	20.4244	54.2774	20.2879	53.7996	20.1173	53.3048	19.9808	52.827	19.8272	52.3322	19.6566	51.8715	19.4518	51.4108	19.23	50.9501	18.9911	50.4894	18.7522	50.0799	18.4451	49.7216
UpperBarton_20150213_SA51880	45.6721	13.6643	45.1027	14.6784	41.1529	16.9024	40.6013	16.849	40.2099	16.6711	44.7825	11.6716	43.9284	11.547	39.4982	12.5967	39.1068	12.9704	38.8755	13.4508	46.9175	13.0771	46.7218	13.5397	46.4727	13.9667	46.1524	14.3581	45.7966	14.6962	45.3874	14.9987	44.996	15.3011	44.569	15.568	44.1242	15.7993	43.6794	16.0306	43.2524	16.2797	42.8076	16.511	42.345	16.7245	41.8646	16.7956	41.3664
UpperBarton_20150213_SA51900	57.3102	32.2604	56.681	32.7536	52.1064	34.1991	51.4602	34.063	51.052	33.7739	57.0381	30.0326	56.2388	29.6245	51.4942	29.6245	50.899	29.9646	50.5418	30.4918	58.8578	31.7162	58.5687	32.1413	58.1775	32.4474	57.7524	32.7366	57.2932	32.9746	56.817	33.1787	56.3409	33.3658	55.8647	33.5358	55.3715	33.6549	54.8784	33.7909	54.3852	33.927	53.892	34.046	53.3818	34.1651	52.8717	34.1821	52.3615
UpperBarton_20150409_SA53118	40.5022	28.8374	39.7479	29.2584	36.7309	30.8195	36.0117	30.7143	35.5907	30.574	40.1513	26.943	39.362	26.8904	35.9766	26.8026	35.2925	27.2061	34.9592	27.592	41.8528	28.469	41.6423	28.8023	41.3792	29.1005	41.0986	29.3636	40.7477	29.5566	40.3969	29.732	40.0461	29.8899	39.6777	30.0302	39.3094	30.1705	38.941	30.3108	38.5551	30.4336	38.1868	30.5564	37.8009	30.6617	37.415	30.7494	37.0291
UpperBarton_20150409_SA53119	69.8707	16.4422	69.2675	16.9765	65.6309	18.5621	64.8208	18.2346	64.5278	18.1312	69.6294	14.2706	68.9055	13.8742	65.0449	13.2709	64.5278	13.495	64.1831	14.0638	71.284	16.1837	71.0599	16.5628	70.7669	16.9075	70.405	17.1661	70.0086	17.3729	69.5949	17.5452	69.1985	17.7348	68.8021	17.9416	68.4057	18.1485	68.0265	18.3725	67.6129	18.5449	67.1993	18.7	66.7684	18.8206	66.3203	18.7861	65.8894
UpperBarton_20150409_SA53120	46.993	5.01561	46.4687	5.50494	43.358	6.85059	42.9385	6.72826	42.5715	6.57098	46.591	3.68744	45.9269	3.63501	42.5191	4.01948	42.2919	4.26414	42.0997	4.59619	48.059	4.59619	47.9541	4.94571	47.6745	5.22532	47.3774	5.43504	47.0454	5.62727	46.7133	5.80203	46.3813	5.97679	46.0493	6.15155	45.6997	6.29136	45.3502	6.43117	45.0007	6.57098	44.6512	6.71078	44.3017	6.83312	43.9172	6.88554	43.5502
UpperBarton_20170918_SA56507	46.2094	20.2294	45.6384	20.7324	41.2744	21.3306	40.8394	20.9907	40.6898	20.5284	46.2366	18.2037	45.5568	17.7959	41.4648	17.0617	41.0297	17.388	40.7306	17.7687	47.6641	20.039	47.365	20.3925	46.9707	20.6508	46.5629	20.8955	46.1278	21.0451	45.6656	21.1266	45.2034	21.2354	44.7411	21.3306	44.2789	21.3713	43.8167	21.4393	43.3545	21.4665	42.8786	21.4937	42.4164	21.5345	41.9406	21.5073	41.4919
Parthenia_20160229_SA53985	54.9088	16.9149	54.5929	17.8052	51.3621	21.4093	50.5293	21.5959	49.955	21.3806	53.5447	15.2062	52.5683	15.1775	48.2893	17.36	47.9447	18.0493	48.0739	18.6093	56.2011	15.7949	56.1006	16.3118	55.8852	16.7857	55.6124	17.2452	55.3109	17.6616	55.0237	18.1067	54.6934	18.5088	54.3632	18.9252	53.9898	19.2841	53.6165	19.6575	53.2575	20.0308	52.8698	20.3898	52.4678	20.7344	52.037	21.0359	51.5632
Parthenia_20160811_DSC4839	31.0741	60.6976	30.2702	60.5753	26.6699	58.5829	26.4777	58.0586	26.4427	57.6741	32.28	59.282	32.1402	58.6179	29.274	55.5244	28.8021	55.4545	28.2778	55.4545	32.1926	61.6763	31.7557	61.6239	31.3188	61.554	30.9168	61.3967	30.4974	61.2394	30.0954	61.0472	29.6934	60.8549	29.3089	60.6452	28.9244	60.418	28.5399	60.1733	28.1729	59.9286	27.8059	59.684	27.4389	59.4393	27.1068	59.1247	26.8447
Parthenia_20161110_SA55536	66.2029	38.3924	65.5825	38.7469	61.4703	39.4381	61.0449	39.0836	60.8322	38.7469	66.2206	36.3362	65.6179	35.9463	61.5589	35.0955	61.0272	35.5032	60.7613	35.9817	67.5854	38.3037	67.2664	38.6228	66.8764	38.8177	66.4865	38.995	66.0611	39.1368	65.6357	39.2609	65.2103	39.3495	64.7672	39.4027	64.324	39.4736	63.8986	39.5267	63.4555	39.5622	63.0124	39.6154	62.5692	39.6508	62.1261	39.6331	61.7007
Parthenia_20161117_SA55541	45.3935	8.84016	45.5163	9.4716	44.6744	13.0673	44.2885	13.383	43.8851	13.4883	43.622	8.10348	43.1133	8.57706	41.219	11.7869	41.2716	12.2078	41.4821	12.5236	45.6742	7.47204	45.8671	7.82284	45.9197	8.22626	45.9548	8.62968	45.9548	9.0331	45.9197	9.43652	45.8846	9.83994	45.832	10.2434	45.7268	10.6292	45.6391	11.0327	45.5338	11.4185	45.4111	11.8044	45.2707	12.1903	45.0953	12.5586	44.8322
Parthenia_20161117_SA55542	18.4999	42.6604	18.857	42.0175	21.5534	39.3568	21.982	39.3747	22.357	39.4461	19.6427	44.2318	20.3748	43.9996	23.732	42.4818	23.8927	41.9639	23.7855	41.6247	17.4463	43.6247	17.4999	43.1961	17.6606	42.8032	17.8749	42.4282	18.1427	42.1068	18.3927	41.7675	18.6784	41.4461	18.9641	41.1247	19.2677	40.8211	19.5534	40.5175	19.8748	40.214	20.1963	39.9461	20.5356	39.6783	20.9105	39.464	21.3213
Parthenia_20161117_SA55543	19.5137	24.5495	20.1252	24.4056	23.5963	24.9812	23.974	25.4488	24.0459	25.8085	18.8843	26.1502	19.3339	26.5998	22.3194	28.4523	22.8409	28.4163	23.2906	28.3264	18.021	24.0639	18.3807	23.8841	18.7584	23.7762	19.154	23.7222	19.5677	23.7222	19.9633	23.7582	20.359	23.7942	20.7547	23.8301	21.1504	23.9021	21.546	23.992	21.9237	24.1179	22.2834	24.2618	22.6611	24.4056	23.0208	24.5855	23.3445
Parthenia_20161117_SA55549	26.9875	27.4355	27.2563	26.9338	29.6934	24.4429	30.1056	24.3174	30.4998	24.4608	27.9373	28.7258	28.457	28.5645	31.575	26.9696	31.7542	26.5933	31.8797	26.1453	25.8586	28.3315	25.8765	27.9373	26.0557	27.5968	26.2349	27.2384	26.4678	26.9338	26.7187	26.6291	26.9875	26.3424	27.2563	26.0557	27.5251	25.7869	27.8118	25.5002	28.0986	25.2493	28.4211	25.0163	28.7258	24.7834	29.0842	24.5862	29.4605
Parthenia_20161117_SA55551	8.29511	15.4973	9.08341	15.4615	12.577	17.2531	12.8099	17.6831	12.8458	18.0952	7.23806	17.0381	7.45306	17.7906	10.4988	20.478	10.9825	20.4242	11.3229	20.2809	7.20223	14.7807	7.6143	14.709	8.04428	14.7449	8.47427	14.8165	8.88634	14.9419	9.2984	15.0494	9.71047	15.1749	10.1046	15.3182	10.4988	15.4973	10.875	15.6944	11.2512	15.9094	11.6096	16.1423	11.9679	16.3931	12.2545	16.6977	12.4875
Parthenia_20161117_SA55553	29.3701	10.6436	30.1714	10.3126	34.1084	10.0688	34.3348	10.2081	34.5613	10.4346	29.283	12.5598	30.0147	12.9605	33.969	13.8315	34.3348	13.6747	34.6484	13.396	28.1159	10.8004	28.4469	10.5217	28.8127	10.2952	29.1959	10.1036	29.614	9.96424	30.0321	9.85972	30.4502	9.80746	30.8857	9.7552	31.3212	9.7552	31.7567	9.70294	32.1747	9.72036	32.6102	9.72036	33.0457	9.73778	33.4638	9.82488	33.8819
Parthenia_20161117_SA55554	57.4709	21.1744	56.8744	21.5954	53.6114	22.9287	53.0325	22.8234	52.6992	22.5778	57.0849	19.4201	56.3657	19.2271	52.8571	19.3675	52.3834	19.7183	52.2255	20.0692	58.734	20.6832	58.5585	21.0341	58.2778	21.3323	57.9621	21.5779	57.6288	21.7709	57.2779	21.9638	56.927	22.1393	56.5586	22.3147	56.1902	22.455	55.8043	22.5603	55.4183	22.6831	55.0499	22.8234	54.664	22.9112	54.278	22.9638	53.8746
Parthenia_20161117_SA55555	55.1036	30.4623	54.5144	30.873	50.6039	31.4444	50.1932	31.1766	50.0147	30.9444	55.175	28.6589	54.5501	28.3732	50.6218	27.7839	50.2111	27.9982	49.9611	28.2303	56.6035	30.4623	56.3	30.7659	55.9071	30.9623	55.5322	31.1587	55.1215	31.3016	54.6929	31.3908	54.2822	31.498	53.8537	31.5694	53.4252	31.6051	52.9788	31.6408	52.5681	31.7123	52.1217	31.7123	51.6931	31.6765	51.2646	31.623	50.8539
Parthenia_20161117_SA55557	26.1069	9.91063	26.2676	10.6071	26.7855	14.6427	26.4641	15.107	26.0712	15.3392	24.1962	9.80349	23.8034	10.4999	22.9641	14.607	23.1962	14.9642	23.4462	15.2142	26.0712	8.21422	26.3569	8.58922	26.5891	8.99993	26.7855	9.4285	26.8926	9.89278	26.9819	10.3392	27.0534	10.8035	27.1426	11.2678	27.1962	11.7499	27.2141	12.2142	27.1962	12.6785	27.2141	13.1606	27.1784	13.6249	27.0712	14.0892	26.8569
Parthenia_20161117_SA55560	6.12427	19.1584	6.80276	18.837	10.5702	19.8905	10.8023	20.194	10.8916	20.6047	5.48149	20.6225	5.74931	21.2832	9.03463	23.39	9.42744	23.2829	9.92738	23.0865	4.82085	18.6049	5.19581	18.4085	5.62432	18.3371	6.03499	18.2835	6.46351	18.3014	6.89203	18.3728	7.30269	18.4442	7.73121	18.5156	8.14188	18.6049	8.55255	18.7477	8.96321	18.8727	9.35602	19.0156	9.74883	19.1763	10.1416	19.3727	10.4452
Parthenia_20161117_SA55566	43.013	5.46084	43.4385	6.06366	44.4136	9.9288	44.2541	10.4607	43.9349	10.8508	40.9918	5.60268	40.584	6.17004	40.2116	10.1061	40.4776	10.6025	40.7967	10.8685	42.747	4.11336	43.0484	4.41477	43.3144	4.75164	43.5094	5.1417	43.7045	5.53176	43.8817	5.92182	44.0059	6.34734	44.13	6.75513	44.2186	7.18065	44.325	7.60617	44.4314	8.01396	44.52	8.43948	44.5732	8.865	44.5378	9.30825	44.4846
Parthenia_20161117_SA55567	45.3925	46.4818	44.8389	45.9818	43.1425	43.1604	43.1961	42.6425	43.4282	42.3568	47.0532	45.9818	47.1603	45.2675	46.4103	41.9639	46.1425	41.6782	45.7675	41.464	45.9639	47.5532	45.6068	47.4282	45.3389	47.1782	45.0711	46.9282	44.8032	46.6603	44.5711	46.3746	44.3925	46.0353	44.1782	45.7318	43.9818	45.4104	43.8211	45.0711	43.6247	44.7496	43.4461	44.4282	43.3032	44.0889	43.1782	43.7318	43.1604
Parthenia_20161117_SA55573	47.9774	42.3639	47.2757	42.2587	44.4163	40.2238	44.1883	39.6098	44.1532	39.1888	49.2053	41.136	49.0474	40.4519	46.8547	37.5223	46.346	37.3469	45.9074	37.2943	49.1001	43.3463	48.6966	43.3814	48.3107	43.2937	47.9247	43.1358	47.5564	42.9779	47.2055	42.7674	46.8547	42.5744	46.5214	42.3639	46.2056	42.1008	45.9074	41.8377	45.5917	41.5921	45.2934	41.3114	44.9952	41.0307	44.7496	40.715	44.5216
Parthenia_20161117_SA55583	28.6575	34.4349	28.3395	33.8519	27.7388	30.283	28.0568	29.8589	28.3218	29.6822	30.3713	34.4349	30.6893	33.9226	31.5374	30.389	31.3254	29.8589	30.9897	29.7176	28.6045	35.813	28.3571	35.495	28.1981	35.1417	28.0568	34.753	27.9331	34.3819	27.8094	34.0109	27.7034	33.6222	27.6504	33.2158	27.6328	32.8271	27.5621	32.4384	27.5091	32.0321	27.4914	31.6434	27.5091	31.237	27.5797	30.8483	27.6858
Parthenia_20161117_SA55584	48.6467	45.8261	48.0219	45.2905	44.5764	42.0593	44.5407	41.3988	44.7728	41.1846	50.6461	44.4693	50.4319	43.7374	48.4325	39.2923	47.8434	38.9888	47.3792	39.0602	49.8428	47.4863	49.3251	47.3792	48.8431	47.1114	48.3968	46.8079	47.9862	46.4866	47.5756	46.1117	47.2007	45.7547	46.8079	45.3798	46.4331	44.987	46.076	44.5943	45.719	44.1837	45.4155	43.7553	45.0763	43.3268	44.8442	42.8448	44.7014
Parthenia_20161117_SA55596	63.7788	18.6021	63.4092	19.2885	60.171	21.8228	59.6254	21.8404	59.291	21.5236	62.758	16.8246	61.9309	16.8422	58.0415	18.2502	57.7775	18.7253	57.7247	19.2357	65.0635	17.775	64.9051	18.1974	64.7115	18.6197	64.4651	18.9893	64.1484	19.3237	63.7788	19.6053	63.4444	19.9221	63.11	20.2213	62.7756	20.538	62.4237	20.8196	62.0365	21.066	61.6493	21.3124	61.2621	21.5412	60.8397	21.7348	60.3998
Parthenia_20161117_SA55602	8.76779	15.7677	9.37492	15.8927	11.8035	18.1249	11.9642	18.607	11.9285	18.9998	7.69637	16.6249	7.85708	17.1963	9.62492	20.0534	9.99992	20.2498	10.3392	20.2856	8.03565	14.7142	8.39279	14.7856	8.74993	14.8927	9.08921	15.0356	9.39278	15.232	9.67849	15.4642	9.98206	15.6963	10.2678	15.9106	10.5713	16.1427	10.8213	16.3927	11.0713	16.6784	11.2856	16.9642	11.4999	17.2677	11.6785	17.5891	11.7499
Parthenia_20161117_SA55604	59.4276	14.2896	59.0553	14.8746	56.9278	17.4453	56.4669	17.5517	56.0768	17.4453	58.2752	13.0308	57.6193	13.1726	54.7649	14.9278	54.5876	15.3888	54.623	15.7965	60.2431	13.2613	60.2431	13.6513	60.1722	14.0236	59.9949	14.3782	59.8354	14.7151	59.6226	15.0519	59.3922	15.3533	59.1439	15.637	58.8957	15.9384	58.6475	16.2398	58.3816	16.5057	58.0979	16.7894	57.7965	17.0021	57.4774	17.2503	57.1228
Parthenia_20161117_SA55605	46.6682	3.59122	46.8266	4.22496	46.3689	7.97461	46.0521	8.3795	45.6824	8.60836	44.8726	3.11591	44.3621	3.64403	42.8129	6.86556	42.9362	7.34087	43.165	7.71055	46.8618	2.30612	47.0203	2.67581	47.1083	3.0807	47.1611	3.46799	47.1963	3.87288	47.2139	4.27777	47.2139	4.68266	47.1611	5.08756	47.1083	5.49245	47.0379	5.87974	46.9675	6.28463	46.8971	6.68952	46.8442	7.07681	46.7034	7.4641	46.4746
Parthenia_20161117_SA55607	54.2816	4.21316	54.2117	4.84251	53.0054	8.28647	52.6383	8.51373	52.2712	8.61863	52.7956	3.35654	52.1663	3.72367	49.8936	6.39841	49.8936	6.95784	50.0684	7.3774	54.8061	2.88453	54.8935	3.28662	54.911	3.6887	54.911	4.09079	54.8061	4.47539	54.6837	4.86	54.5613	5.26208	54.4389	5.64669	54.2816	6.01381	54.1592	6.39841	54.0019	6.76553	53.862	7.15014	53.6872	7.51726	53.4425	7.84942	53.1802
Parthenia_20161117_SA55610	49.9691	19.4441	49.4606	20.1279	46.2521	22.2318	45.7436	22.1617	45.3929	22.0916	49.2151	17.7259	48.3911	17.7083	44.7617	18.7428	44.4111	19.146	44.0429	19.5844	51.0561	18.883	50.986	19.2863	50.758	19.637	50.495	19.9526	50.197	20.2506	49.8639	20.5136	49.5307	20.7591	49.1976	21.0045	48.8469	21.25	48.4963	21.4779	48.1456	21.6708	47.7774	21.8812	47.3917	22.039	46.9884	22.1266	46.5676
Parthenia_20161117_SA55611	54.1967	32.5598	53.4999	32.0024	51.27	29.3718	51.2874	28.7621	51.4965	28.3788	55.782	31.7759	55.782	30.9745	54.6148	27.7517	54.1619	27.3161	53.7264	27.1593	54.8762	33.6051	54.4929	33.5006	54.127	33.3786	53.7786	33.1696	53.5173	32.8908	53.2212	32.5947	52.9773	32.2985	52.7159	32.0024	52.4546	31.7062	52.2282	31.3752	52.0017	31.0616	51.7752	30.7306	51.5662	30.3996	51.4094	30.0338	51.3397
Parthenia_20161117_SA55614	12.5161	13.5847	13.1319	13.3312	17.4247	12.8783	17.6964	13.15	17.8413	13.4942	12.335	15.5228	12.9508	15.9032	17.0081	16.8451	17.4247	16.6821	17.787	16.3198	10.7953	13.5847	11.1214	13.2406	11.5561	13.0051	12.0089	12.8602	12.4617	12.7334	12.9508	12.6429	13.4217	12.5523	13.8927	12.5161	14.3817	12.498	14.8527	12.4617	15.3417	12.4617	15.8126	12.4436	16.3017	12.4799	16.7545	12.5885	17.2074
Parthenia_20161117_SA55619	11.1469	19.8027	11.7203	19.3547	15.5913	18.5662	16.0393	18.7095	16.2902	19.0321	11.111	21.6306	11.8279	21.8099	15.6809	22.3296	16.0931	21.9891	16.3081	21.6486	9.62358	20.1432	9.87447	19.7848	10.2687	19.6056	10.663	19.4443	11.0573	19.2292	11.4694	19.0859	11.8816	18.9246	12.2938	18.7991	12.7239	18.7633	13.154	18.6916	13.602	18.6199	14.0321	18.5482	14.4443	18.4407	14.8924	18.4228	15.3225
Parthenia_20161117_SA55621	21.482	19.4106	22.2141	19.357	26.0891	20.232	26.4641	20.732	26.6426	21.2498	20.6784	21.1784	21.1605	21.732	24.3927	23.9462	24.9641	23.9641	25.4462	23.8034	20.0534	18.7856	20.482	18.6963	20.9105	18.6249	21.3391	18.5891	21.7855	18.607	22.2141	18.6427	22.6427	18.732	23.0712	18.8213	23.482	18.9463	23.9105	19.0713	24.3212	19.1963	24.7319	19.357	25.1427	19.4998	25.5177	19.7141	25.8748
Parthenia_20161117_SA55623	13.0391	20.2691	13.6866	20.377	17.1037	22.4812	17.1757	22.9668	17.1217	23.3985	11.7442	21.564	11.9061	22.1755	14.2801	25.5747	14.6937	25.6286	15.1074	25.6466	12.2658	19.226	12.6794	19.2979	13.0751	19.4238	13.4528	19.5677	13.8305	19.7475	14.1902	19.9633	14.5678	20.1432	14.9096	20.359	15.2693	20.5748	15.629	20.7727	15.9527	21.0424	16.2584	21.3122	16.5642	21.6	16.816	21.9237	16.9958
Parthenia_20161117_SA55625	42.1197	18.4783	42.7175	18.9675	44.3661	22.6088	44.2936	23.1885	44.0943	23.587	40.2538	19.0218	40.1632	19.8189	40.5255	23.6776	40.8878	24.1486	41.3226	24.366	41.5943	17.1196	41.9567	17.3551	42.3009	17.645	42.6088	17.953	42.8625	18.3153	43.0798	18.6957	43.2972	19.0761	43.4784	19.4747	43.6777	19.8733	43.8588	20.2537	44.0038	20.6704	44.1487	21.087	44.3299	21.4856	44.3842	21.9204	44.348
Parthenia_20161117_SA55629	7.29513	27.7215	8.04244	27.7571	11.2986	29.3407	11.4765	29.8744	11.5832	30.2125	6.29872	29.0026	6.54782	29.7321	9.05664	32.3655	9.48367	32.4544	9.85732	32.4544	6.26314	27.0276	6.65458	26.9742	7.04603	27.0276	7.43747	27.0987	7.82892	27.1877	8.20257	27.2945	8.55843	27.4546	8.91429	27.6503	9.25236	27.846	9.59043	28.0596	9.94629	28.2375	10.3021	28.3976	10.6402	28.5934	10.9427	28.8425	11.1562
Parthenia_20170223_SA56083	18.1793	13.7096	18.9214	14.0629	21.7657	16.5716	21.9247	17.0487	21.8717	17.455	16.7483	14.9109	16.8013	15.706	19.0274	18.9744	19.4867	19.1687	19.8577	19.1334	17.19	12.6496	17.614	12.7202	18.0203	12.8439	18.4267	13.0382	18.78	13.2502	19.1334	13.5153	19.4867	13.7626	19.8047	14.0453	20.1404	14.3456	20.4407	14.6459	20.7411	14.9639	21.0237	15.282	21.3064	15.6176	21.5361	15.971	21.6951
Parthenia_20170223_SA56087	53.319	28.9915	52.736	29.1682	48.2839	28.9209	48.0896	28.6205	47.9306	28.3202	53.7253	27.2955	53.2837	26.8538	49.2556	25.1755	48.7786	25.2991	48.4782	25.5995	54.8207	29.3979	54.3967	29.5746	53.955	29.6629	53.4957	29.7159	53.054	29.7512	52.5947	29.7336	52.1353	29.7336	51.676	29.7512	51.2343	29.6982	50.775	29.6629	50.3156	29.6276	49.8739	29.5569	49.4146	29.4862	48.9906	29.3449	48.6196
Parthenia_20170223_SA56118	17.8939	3.66649	18.2623	4.05243	20.1394	6.92948	20.1043	7.43823	19.9639	7.85926	16.0869	4.33312	16.0518	4.99976	16.7185	8.31538	17.122	8.66624	17.4728	8.87676	17.3149	2.45602	17.6658	2.61391	17.9991	2.80688	18.2798	3.05248	18.5254	3.36826	18.7359	3.68403	18.9815	3.98226	19.1745	4.29803	19.3675	4.63135	19.5955	4.94713	19.771	5.28044	19.9288	5.6313	20.1043	5.96462	20.2095	6.33302	20.1569
Parthenia_20170223_SA56119	62.7642	12.9784	62.25	13.4039	59.1827	14.5563	58.7395	14.5741	58.4203	14.3258	62.4273	11.4359	61.8245	11.294	58.5799	11.6131	58.2076	11.9678	57.9948	12.3224	63.9166	12.5528	63.7216	12.8543	63.4379	13.0847	63.1365	13.2798	62.8174	13.4393	62.4805	13.5812	62.1437	13.7408	61.8245	13.9003	61.4876	14.0422	61.1508	14.1663	60.8139	14.2904	60.477	14.4145	60.1224	14.5031	59.7501	14.5563	59.3955
Parthenia_20170223_SA56136	31.0612	14.2009	31.469	14.6973	33.2596	17.5872	33.2064	18.1545	33.0114	18.5445	29.4479	14.7505	29.377	15.3888	29.9266	18.8991	30.2989	19.2182	30.618	19.3246	30.6003	12.9954	30.9371	13.1549	31.2385	13.3854	31.4867	13.6691	31.7349	13.9705	31.9477	14.2718	32.1427	14.591	32.3022	14.9278	32.4618	15.2824	32.6568	15.6015	32.8164	15.9561	32.9759	16.293	33.1355	16.6298	33.2596	17.0021	33.2596
Parthenia_20170518_SA56154	71.9245	21.2447	71.463	21.9176	67.8486	24.7246	67.2718	24.6477	66.7911	24.4939	71.0401	19.2837	70.3095	19.1299	65.926	20.4372	65.6952	20.9948	65.676	21.3985	73.2511	20.3603	73.0973	20.8218	72.8858	21.264	72.6166	21.6869	72.309	22.0522	71.9437	22.3983	71.5592	22.7059	71.1939	23.0327	70.7901	23.3019	70.3864	23.6095	69.9634	23.8402	69.5404	24.0902	69.0982	24.3209	68.6368	24.4939	68.1754
Parthenia_20170518_SA56156	44.669	22.8633	44.3421	23.5555	41.4962	26.4206	40.977	26.4591	40.5347	26.4591	43.5537	21.1904	42.8038	21.325	39.1502	22.9787	38.9387	23.4402	38.8426	23.8055	45.8612	22.0364	45.7842	22.4595	45.592	22.8633	45.3804	23.2479	45.1497	23.6132	44.8805	23.9786	44.5921	24.3055	44.2844	24.6131	43.9575	24.9016	43.6306	25.19	43.2845	25.4784	42.9384	25.7284	42.573	25.9784	42.1884	26.1899	41.7654
Parthenia_20170518_SA56157	64.4782	26.0374	63.7667	26.3451	59.363	25.0759	59.0169	24.6529	58.863	24.1721	65.3435	24.3644	64.9782	23.7875	61.2283	21.4222	60.613	21.4991	60.1707	21.6145	65.9974	26.6912	65.5166	26.8066	65.0359	26.8258	64.5551	26.8643	64.0744	26.8066	63.5936	26.7297	63.1129	26.6912	62.6321	26.5759	62.1706	26.4413	61.7283	26.2682	61.2668	26.1143	60.8053	25.9413	60.3437	25.7874	59.9207	25.5567	59.5553
Parthenia_20170518_SA56167	47.8798	26.7171	47.3614	27.2726	44.7693	29.624	44.2138	29.6981	43.788	29.624	46.88	25.0508	46.1394	25.1249	42.9178	26.5505	42.6215	26.9578	42.566	27.3467	48.8426	25.921	48.75	26.3098	48.5834	26.6616	48.3797	26.9949	48.139	27.2911	47.8613	27.5688	47.565	27.8466	47.2688	28.1058	46.9726	28.3465	46.6763	28.6057	46.3616	28.8279	46.0283	29.05	45.7135	29.2722	45.3618	29.4574	44.9915
Parthenia_20170817_SA56175	38.2382	57.963	37.4362	57.9118	33.9724	56.5127	33.6653	55.9496	33.5117	55.4718	39.3302	56.3762	38.9378	55.6936	36.2247	52.9977	35.6275	52.9124	35.1668	52.8953	39.7056	58.8162	39.279	58.9185	38.8525	58.9015	38.4259	58.8332	38.0164	58.6967	37.5898	58.5602	37.1803	58.4066	36.7708	58.2701	36.3783	58.0995	35.9859	57.9118	35.5934	57.7071	35.218	57.5023	34.8597	57.2464	34.5184	56.9734	34.2284
Parthenia_20170817_SA56180	40.8416	30.67	40.1864	30.7389	36.5833	30.5838	36.3936	30.3252	36.3419	29.9459	41.2898	28.9632	40.876	28.6184	37.4798	27.0151	37.1522	27.1358	36.8074	27.3944	42.169	30.8251	41.8415	31.0492	41.4622	31.1699	41.0829	31.2906	40.6864	31.3078	40.2899	31.2906	39.8934	31.2734	39.4968	31.2389	39.1003	31.2044	38.7038	31.1699	38.3073	31.101	37.9108	31.0492	37.5315	30.9803	37.135	30.8768	36.7902
Parthenia_20170817_SA56182	70.3807	23.5327	69.7466	24.1305	66.4133	26.2863	65.7611	26.2501	65.2538	26.0327	69.5654	21.6667	68.7683	21.703	64.6741	22.6631	64.348	22.9349	64.185	23.4965	71.6669	22.7899	71.522	23.2247	71.2865	23.6051	71.0147	23.9856	70.6886	24.3117	70.3263	24.5834	69.9459	24.8552	69.5836	25.1088	69.185	25.3443	68.8046	25.5979	68.3879	25.8153	67.9712	25.9965	67.5364	26.1414	67.0835	26.232	66.6306
Parthenia_20170817_SA56188	28.6045	43.1993	28.1531	43.7844	24.308	45.5064	23.5891	45.473	23.0207	45.2222	28.1698	41.2099	27.4677	41.026	23.238	41.26	22.7866	41.6613	22.5191	42.1294	30.1426	42.5975	29.9252	42.9987	29.6243	43.3498	29.2899	43.6674	28.9221	43.9516	28.5376	44.2024	28.1364	44.4197	27.7184	44.6203	27.3005	44.8042	26.8658	44.9881	26.4312	45.1386	25.9965	45.2723	25.5618	45.4061	25.0937	45.4562	24.6423
Parthenia_20170817_SA56190	67.9428	31.825	67.236	31.8595	63.4604	31.2734	63.1329	30.8596	62.9605	30.4976	68.6669	29.808	68.2187	29.308	64.7879	27.3599	64.2707	27.4288	63.7708	27.6185	69.4944	32.1871	69.0979	32.3595	68.6669	32.4284	68.2532	32.4802	67.8222	32.4974	67.3912	32.4802	66.9602	32.4284	66.5292	32.3595	66.1154	32.256	65.7016	32.1526	65.2706	32.0492	64.8569	31.9457	64.4604	31.7906	64.0638	31.6182	63.6846
Parthenia_20170817_SA56191	47.8862	38.1097	47.1474	38.2128	43.4705	37.2162	43.0925	36.6836	43.0753	36.2712	48.7453	36.4087	48.2814	35.8417	45.2746	33.5393	44.6904	33.5736	44.3124	33.797	49.1577	38.6939	48.7625	38.797	48.3501	38.8657	47.9378	38.8313	47.5254	38.7798	47.113	38.711	46.7007	38.6251	46.3055	38.5392	45.8931	38.4361	45.4979	38.3159	45.1028	38.1784	44.7247	38.0238	44.3467	37.8519	43.9859	37.6286	43.6766
Parthenia_20170817_SA56192	42.5337	57.8676	41.8295	58.0965	37.886	58.0789	37.1994	57.5155	36.9353	56.9698	43.009	55.9135	42.4985	55.4205	38.8014	53.6424	38.0444	53.7305	37.4634	54.065	44.1709	58.2549	43.7836	58.4838	43.3611	58.6247	42.921	58.6775	42.4809	58.7127	42.0231	58.7479	41.583	58.7303	41.1429	58.7303	40.6852	58.6951	40.245	58.6775	39.8049	58.607	39.3648	58.5366	38.9247	58.4662	38.5021	58.3254	38.0972
Parthenia_20170817_SA56207	29.3802	46.6409	28.7089	46.8529	25.3875	45.8812	25.0695	45.5279	24.9281	45.1215	30.0869	45.0685	29.7512	44.5385	26.7655	42.6835	26.3062	42.6658	25.9882	42.8071	30.5639	47.1356	30.2106	47.2769	29.8219	47.3299	29.4509	47.3476	29.0622	47.3299	28.6735	47.2946	28.3202	47.1709	27.9492	47.0826	27.5782	46.9766	27.2072	46.8706	26.8362	46.7645	26.4828	46.6232	26.1118	46.4819	25.7938	46.2875	25.5111
Parthenia_20170817_SA56208	37.2585	8.25595	36.8315	8.77195	33.8957	10.2132	33.3975	10.1242	33.0594	9.9107	36.7959	6.74355	36.1732	6.6012	32.8993	6.93927	32.5968	7.27734	32.4366	7.6154	38.3795	7.79333	38.2372	8.1314	38.0236	8.41609	37.7745	8.68298	37.4721	8.87871	37.1696	9.07443	36.8493	9.23457	36.529	9.4125	36.2088	9.57263	35.8707	9.73277	35.5326	9.85732	35.1946	9.99967	34.8565	10.1242	34.5006	10.1776	34.1448
Parthenia_20170817_SA56214	43.0881	23.1756	42.4389	23.6142	38.5266	23.9826	38.0705	23.7195	37.7722	23.4212	43.1758	21.0353	42.5267	20.5791	38.5617	19.8598	38.0354	20.1054	37.7371	20.5089	44.5968	23.1581	44.2811	23.4563	43.9126	23.6844	43.5091	23.8598	43.0881	23.9826	42.667	24.123	42.2284	24.1932	41.8074	24.2458	41.3688	24.2984	40.9302	24.3335	40.4916	24.3511	40.053	24.3511	39.6144	24.3335	39.1758	24.2634	38.7722
Parthenia_20170817_SA56215	62.2577	42.2406	61.6705	42.6142	57.2045	43.4683	56.7241	43.1658	56.475	42.5786	62.3645	40.1232	61.8663	39.5894	57.4714	38.593	57.0088	38.8421	56.6885	39.4115	63.8591	42.205	63.521	42.5431	63.094	42.7744	62.6669	43.0057	62.2221	43.148	61.7595	43.3082	61.2969	43.4327	60.8165	43.5217	60.3539	43.5928	59.8734	43.6462	59.393	43.6996	58.9126	43.7174	58.4322	43.7708	57.9518	43.6996	57.507
Parthenia_20170817_SA56218	58.97	20.0704	58.6331	20.8505	55.1048	23.6873	54.6261	23.6873	53.9169	23.5277	57.9416	18.3328	57.0729	18.3505	52.9063	19.8931	52.5695	20.3718	52.4808	20.8505	60.2288	19.1307	60.1934	19.6271	59.9629	20.0526	59.6969	20.4781	59.3778	20.8505	59.0232	21.2051	58.6686	21.5597	58.2962	21.8788	57.9239	22.2157	57.5516	22.5348	57.1438	22.8185	56.736	23.1022	56.3282	23.3681	55.8495	23.5277	55.3708
Parthenia_20170817_SA56224	65.9385	14.5465	65.2765	14.8079	62.0013	15.0692	61.5484	14.895	61.2174	14.6859	66.0779	12.9264	65.5204	12.5605	62.1407	11.7766	61.7749	11.9508	61.4439	12.2295	67.1928	14.5988	66.9141	14.8427	66.6005	15.0169	66.2521	15.1563	65.8862	15.2434	65.5204	15.2956	65.1545	15.3131	64.7887	15.3479	64.4229	15.3479	64.057	15.3827	63.6912	15.3827	63.3253	15.3653	62.9595	15.3479	62.5937	15.2956	62.2452
Parthenia_20170817_SA56227	38.6958	41.1429	37.9564	41.0725	34.2417	39.2768	33.8368	38.6958	33.7312	38.0796	40.0514	39.5408	39.8401	38.8014	37.1465	35.5093	36.4423	35.386	35.7558	35.4037	39.9986	41.9703	39.5584	42.0407	39.1183	42.0055	38.6782	41.9175	38.2557	41.7767	37.8507	41.6006	37.4458	41.407	37.0409	41.2309	36.636	41.0549	36.2487	40.826	35.879	40.5795	35.5269	40.3154	35.1396	40.069	34.7699	39.8225	34.4706
Parthenia_20170817_SA56228	70.051	25.8176	69.3393	25.9244	66.2078	25.0525	66.012	24.6789	65.9231	24.323	70.7272	24.3942	70.3001	23.8604	67.6134	22.0633	67.2753	22.1167	66.8305	22.3124	71.1542	26.2447	70.8161	26.387	70.4603	26.4404	70.1044	26.4582	69.7486	26.4226	69.3927	26.3514	69.0368	26.2625	68.681	26.1735	68.3429	26.0667	68.0048	25.96	67.649	25.871	67.3109	25.7643	66.9729	25.6041	66.6704	25.4262	66.3857
Parthenia_20170817_SA56249	65.3753	16.8043	64.7965	17.12	60.7094	17.4007	60.1656	17.1551	59.8324	16.699	65.656	14.8748	65.235	14.4187	61.2883	12.9979	60.7445	13.1733	60.341	13.5066	66.9365	16.8744	66.6207	17.1902	66.2173	17.4182	65.7963	17.5936	65.3578	17.6989	64.9192	17.7515	64.4632	17.8217	64.0246	17.8567	63.5686	17.8743	63.1125	17.8918	62.6565	17.8567	62.2179	17.8217	61.7619	17.7866	61.3058	17.7164	60.9024
Parthenia_20170817_SA56254	57.1137	6.52079	56.5718	7.06273	52.8481	8.21654	52.3061	8.09417	51.939	7.81445	56.9214	4.7551	56.1871	4.49287	52.4285	4.31805	52.0089	4.54532	51.6418	4.80755	58.4773	6.06625	58.25	6.41589	57.9179	6.67812	57.5507	6.90539	57.2011	7.13266	56.834	7.34244	56.4494	7.51726	56.0648	7.6746	55.6452	7.77949	55.2431	7.90186	54.841	8.00676	54.4215	8.09417	54.0019	8.18158	53.5823	8.21654	53.1628
Parthenia_20170817_SA56259	69.2311	15.435	68.8826	16.0273	65.8165	18.3966	65.381	18.414	64.9106	18.2224	68.3774	13.8149	67.7154	13.7626	63.9873	14.9298	63.726	15.3653	63.4821	15.8183	70.4331	14.7382	70.3286	15.1388	70.1195	15.5047	69.8756	15.8357	69.5969	16.1667	69.3007	16.4454	68.9872	16.7067	68.6387	16.9681	68.3252	17.2119	67.9942	17.4733	67.6283	17.6997	67.2799	17.9088	66.9141	18.1178	66.5308	18.2572	66.1127
Parthenia_20170817_SA56272	50.6144	28.344	50.0334	28.9074	46.618	30.7383	46.0547	30.7031	45.5969	30.5271	50.0334	26.5483	49.2764	26.3547	45.4209	26.9356	44.9984	27.2877	44.7519	27.7103	51.8995	27.7631	51.6883	28.1504	51.4066	28.4673	51.0897	28.7666	50.7552	29.0306	50.3855	29.2595	50.0158	29.4708	49.6461	29.6996	49.2764	29.9109	48.8891	30.1222	48.5018	30.2982	48.0969	30.4566	47.6919	30.6151	47.2694	30.7207	46.8469
Parthenia_20170817_SA56273	57.1057	24.4563	56.5443	24.6844	52.7022	23.7546	52.4566	23.3686	52.246	22.8949	57.8426	22.9125	57.5268	22.3686	54.439	20.1756	53.9303	20.1756	53.2987	20.2282	58.3513	24.9651	57.9829	25.123	57.5794	25.1756	57.1759	25.1756	56.7724	25.1406	56.3689	25.1055	55.9654	25.0177	55.5794	24.9476	55.1759	24.8423	54.7899	24.737	54.4039	24.6142	54.018	24.4914	53.632	24.3862	53.2636	24.1932	52.9478
Parthenia_20171109_SA56517	39.9274	49.5913	39.2031	49.6266	35.5107	48.3722	35.0867	47.8776	34.9453	47.4006	40.7931	47.9482	40.4928	47.2416	37.3127	44.9448	36.7297	44.8918	36.235	44.9802	41.3054	50.2096	40.8991	50.3333	40.4751	50.404	40.0511	50.3863	39.6271	50.3156	39.2031	50.2449	38.7791	50.1389	38.3727	50.0153	37.9664	49.8563	37.5777	49.6973	37.1714	49.5383	36.8004	49.3439	36.4294	49.1319	36.076	48.8846	35.7757
Parthenia_20171109_SA56518	32.6251	38.0234	32.136	38.5487	29.3282	40.7406	28.676	40.7044	28.0783	40.6319	31.8099	36.2843	31.1397	36.2843	27.7159	37.2444	27.2631	37.7517	27.1544	38.1864	33.9475	37.3169	33.8751	37.7154	33.6939	38.0958	33.4222	38.4038	33.1323	38.6936	32.8063	38.9654	32.4802	39.219	32.1541	39.4726	31.8099	39.69	31.4476	39.8892	31.1035	40.1066	30.7412	40.324	30.3789	40.5233	29.9984	40.6501	29.5818
Parthenia_20171109_SA56526	48.7049	27.6565	48.3377	28.2509	45.4707	30.3138	44.9462	30.2613	44.5092	30.104	47.9356	26.0657	47.2364	26.2055	43.8623	27.167	43.5651	27.6041	43.4428	28.0062	49.8587	26.8873	49.8062	27.2894	49.5964	27.6216	49.3517	27.9537	49.0895	28.2334	48.7923	28.5306	48.4951	28.7754	48.1804	29.0376	47.8657	29.2824	47.5336	29.5271	47.2014	29.7369	46.8518	29.9292	46.5021	30.1215	46.1175	30.2439	45.7154
Parthenia_20171109_SA56533	60.9164	11.5939	60.7586	12.3482	58.5485	15.1721	58.0399	15.33	57.5487	15.2598	59.7062	10.3661	59.0221	10.4889	56.0578	12.5762	55.8824	13.0498	55.8824	13.4883	61.8285	10.6468	61.811	11.0502	61.7408	11.4361	61.618	11.822	61.4426	12.1903	61.2146	12.506	60.969	12.8393	60.741	13.1725	60.4955	13.4883	60.2499	13.804	60.0043	14.1022	59.7062	14.3828	59.408	14.6634	59.0747	14.8915	58.7239
Parthenia_20171109_SA56535	64.6119	38.1629	63.9582	38.6753	60.4776	39.7883	59.9829	39.647	59.6295	39.382	64.3115	36.3784	63.6578	36.0074	59.9299	36.0781	59.4882	36.3961	59.2938	36.7671	65.937	37.9509	65.672	38.2512	65.3363	38.5162	65.0006	38.7459	64.6472	38.9403	64.2585	39.0993	63.8698	39.2406	63.4811	39.382	63.0924	39.5056	62.7037	39.6117	62.2974	39.7	61.891	39.7883	61.4846	39.8413	61.0783	39.859	60.6719
Parthenia_20171109_SA56546	65.9441	31.9458	65.2775	32.2616	61.5233	32.5423	60.997	32.2265	60.6988	31.8055	66.1722	30.1213	65.6459	29.6477	61.8917	28.6302	61.3654	28.8582	60.9619	29.1916	67.3476	32.0511	67.0143	32.2967	66.6459	32.5072	66.2599	32.6475	65.8389	32.7002	65.4354	32.7528	65.0144	32.7879	64.5933	32.8405	64.1898	32.9107	63.7688	32.9107	63.3478	32.9107	62.9443	32.8756	62.5233	32.8405	62.1198	32.7352	61.7338
Parthenia_20171109_SA56549	39.2961	34.6038	38.8866	35.1498	36.0712	37.1632	35.5934	37.1632	35.1668	37.1291	38.5965	32.9828	37.931	32.8633	34.4331	33.9383	34.1431	34.3308	34.0066	34.7403	40.4052	33.9383	40.2857	34.2966	40.081	34.6208	39.825	34.928	39.552	35.1839	39.262	35.4399	38.9719	35.6787	38.6648	35.9176	38.3406	36.1224	38.0334	36.3442	37.7092	36.5489	37.385	36.7537	37.0438	36.9414	36.6855	37.0779	36.3101
Parthenia_20171109_SA56551	47.6201	36.3445	47.0882	36.7345	43.7729	37.8869	43.3829	37.7273	43.0815	37.4968	47.3542	34.6779	46.7691	34.2524	43.1524	34.3056	42.8155	34.5893	42.5141	34.9084	48.9675	36.0431	48.7548	36.3622	48.4356	36.6104	48.1165	36.8231	47.7797	37.0182	47.4251	37.16	47.0528	37.2841	46.6805	37.4082	46.3081	37.55	45.9536	37.6741	45.5635	37.7805	45.1912	37.8869	44.8189	37.9578	44.4289	37.9932	44.0388
Parthenia_20171109_SA56552	37.5465	32.1335	37.0811	32.6851	34.0298	34.5814	33.5643	34.4952	33.1851	34.3746	36.8397	30.4268	36.1329	30.2717	32.6334	31.2198	32.2886	31.6853	32.1163	32.1335	38.8222	31.4095	38.7188	31.806	38.4774	32.1507	38.2016	32.4438	37.9086	32.7369	37.581	32.9954	37.2362	33.2368	36.8915	33.4781	36.5467	33.685	36.2019	33.9264	35.8571	34.1505	35.4779	34.3056	35.0986	34.4952	34.7021	34.5987	34.2884
Parthenia_20171109_SA56554	48.3065	38.9952	47.5847	39.2479	43.7952	39.1576	43.3802	38.8689	43.1456	38.4178	48.6493	37.1547	48.2884	36.505	44.5351	35.1517	43.9937	35.278	43.5426	35.6569	49.732	39.2659	49.3892	39.5185	48.9922	39.681	48.5952	39.7892	48.1621	39.8253	47.7471	39.8614	47.314	39.8614	46.899	39.8614	46.4659	39.8614	46.0508	39.8434	45.6178	39.8253	45.2027	39.7892	44.7877	39.699	44.3907	39.5546	44.0478
Parthenia_20171109_SA56558	38.9599	55.6846	38.2909	55.6846	35.122	54.0474	34.8579	53.5896	34.7699	53.2199	39.9986	54.329	39.8577	53.7129	37.1994	51.1601	36.7416	51.0545	36.3719	51.1249	40.0866	56.336	39.6993	56.3888	39.312	56.336	38.9247	56.2832	38.5549	56.1423	38.1852	56.0015	37.8331	55.8607	37.4634	55.7022	37.1113	55.5262	36.7592	55.3501	36.4247	55.1565	36.0726	54.9628	35.7558	54.7339	35.4741	54.4875	35.2276
Parthenia_20171109_SA56559	35.228	48.0719	34.7333	48.4606	30.6699	49.9623	30.1046	49.7679	29.6099	49.5206	35.0513	46.0402	34.3446	45.7929	30.0339	45.6869	29.6452	45.9519	29.2036	46.4465	36.7474	47.7716	36.447	48.1072	36.076	48.3899	35.705	48.6549	35.2987	48.8669	34.8923	49.0613	34.486	49.2733	34.062	49.4323	33.6203	49.5736	33.1963	49.7326	32.7546	49.8386	32.2953	49.9269	31.8536	49.9976	31.3943	50.0153	30.9349
Parthenia_20171109_SA56560	42.1535	26.0235	41.4468	26.0942	37.9134	25.2991	37.56	25.0341	37.3304	24.5395	42.8778	24.3981	42.5245	23.8504	39.3091	21.9777	38.7791	21.9954	38.2844	22.1544	43.4608	26.4652	43.0721	26.5712	42.6658	26.6418	42.2595	26.6772	41.8708	26.6418	41.4644	26.5712	41.0581	26.5005	40.6694	26.4475	40.2631	26.3768	39.8744	26.2885	39.4681	26.2002	39.0794	26.0765	38.7261	25.8998	38.3727	25.7055	38.0724
Parthenia_20171109_SA56562	48.89	31.1678	48.3621	31.4846	44.4727	32.0654	44.0679	31.7486	43.8567	31.379	48.978	29.4255	48.538	29.0735	44.7015	28.1936	44.2615	28.5456	44.0151	28.8976	50.3155	31.027	50.0164	31.3262	49.6468	31.5374	49.2596	31.731	48.8548	31.8718	48.45	31.9774	48.0453	32.083	47.6229	32.1534	47.2005	32.2062	46.7781	32.259	46.3558	32.259	45.9334	32.259	45.4934	32.2766	45.071	32.2414	44.6663
Parthenia_20171109_SA56565	62.193	38.3262	61.4613	38.3088	57.6809	37.159	57.3151	36.7409	57.1757	36.3576	63.0989	36.6886	62.7504	36.0266	59.4579	33.6225	58.9178	33.64	58.4475	33.8316	63.4995	38.9534	63.0814	39.023	62.6459	39.023	62.2278	38.9882	61.7923	38.9011	61.3916	38.7966	60.9735	38.6746	60.5554	38.5527	60.1547	38.4307	59.7366	38.2914	59.3359	38.152	58.9527	37.9604	58.5694	37.7861	58.2036	37.5597	57.8726
Parthenia_20171109_SA56568	60.8253	26.4427	60.2267	27.0237	56.7409	29.0835	56.0543	29.0306	55.5966	28.8898	60.0859	24.3301	59.3465	24.2069	55.2269	24.9815	54.7692	25.404	54.5227	25.897	62.3041	25.7385	62.128	26.161	61.8288	26.5131	61.5119	26.8476	61.1598	27.1469	60.7725	27.3934	60.3675	27.6222	59.9802	27.8687	59.5929	28.0976	59.188	28.3264	58.7655	28.5201	58.3606	28.7138	57.9381	28.925	57.4979	29.0306	57.0402
Parthenia_20171109_SA56569	48.9187	29.1506	48.1618	29.133	44.7468	27.8303	44.4124	27.3727	44.342	27.003	49.8517	27.4255	49.57	26.7742	46.6303	24.5562	46.1375	24.5034	45.5918	24.609	50.1686	29.5906	49.7813	29.6787	49.3764	29.6963	48.9715	29.6963	48.5667	29.6611	48.1618	29.5906	47.7745	29.4674	47.3873	29.3442	47.0176	29.2034	46.6303	29.045	46.2607	28.8865	45.891	28.7105	45.539	28.5169	45.2045	28.3056	44.9053
Parthenia_20171109_SA56573	38.1961	25.5891	37.9461	25.8926	35.089	27.6962	34.7319	27.6426	34.3747	27.5355	37.6604	24.0712	37.089	23.982	33.8569	24.6605	33.589	24.9284	33.5176	25.2855	39.3211	25.1069	39.1783	25.4284	38.964	25.7141	38.7497	25.9998	38.4818	26.2319	38.1961	26.4641	37.8926	26.6426	37.589	26.8391	37.2854	26.9998	36.9818	27.1962	36.6604	27.3748	36.339	27.5176	35.9997	27.6426	35.6604	27.7319	35.3033
Parthenia_20171109_SA56574	41.1465	29.2847	40.4601	29.5839	36.8171	29.7071	36.3595	29.3903	36.2011	28.968	41.4808	27.6304	41.0585	27.1377	37.5739	25.8177	37.0811	25.9585	36.6763	26.3105	42.4312	29.4783	42.0968	29.6895	41.7272	29.8479	41.3401	29.9711	40.9529	30.0415	40.5481	30.0943	40.1433	30.1295	39.7561	30.1295	39.3514	30.1295	38.9466	30.1295	38.5418	30.1119	38.137	30.0943	37.7499	30.0591	37.3627	29.9359	36.9931
Parthenia_20171109_SA56582	34.741	14.1268	34.2447	14.7827	31.0188	16.7678	30.487	16.7678	29.9021	16.5729	33.9965	12.3011	33.2698	12.1771	29.4412	12.9392	29.1222	13.3115	28.8209	13.7901	35.964	13.5951	35.84	14.0028	35.6095	14.3573	35.3082	14.6586	35.0069	14.9245	34.6701	15.1903	34.3156	15.4385	33.9611	15.6512	33.5712	15.8284	33.2167	16.0411	32.8444	16.2538	32.4722	16.4311	32.1	16.626	31.6923	16.7324	31.2669
Parthenia_20171109_SA56589	29.1537	62.4619	28.3983	62.372	25.2509	60.1418	25.0711	59.7102	25.0171	59.3685	30.3767	61.167	30.1788	60.5015	27.9307	57.516	27.4271	57.4081	27.0674	57.4621	30.1429	63.2892	29.7292	63.2712	29.3335	63.1453	28.9559	62.9835	28.5602	62.8396	28.1825	62.6597	27.8228	62.4619	27.4811	62.2281	27.1394	61.9763	26.7977	61.7605	26.438	61.5267	26.1322	61.2569	25.8265	60.9691	25.5747	60.6454	25.3409
Parthenia_20171109_SA56594	45.7554	25.2104	45.2977	25.7561	41.8647	27.8335	41.1429	27.8687	40.6147	27.7279	45.016	23.2738	44.259	23.1506	40.2802	24.066	39.8401	24.4005	39.5232	24.8583	47.1462	24.5414	46.9877	24.9639	46.7237	25.3336	46.4244	25.6681	46.0723	25.9322	45.7026	26.2138	45.3329	26.4603	44.9632	26.7068	44.5759	26.9356	44.1885	27.1645	43.7836	27.3758	43.3787	27.5694	42.9562	27.6927	42.5161	27.7807	42.0583
Parthenia_20171109_SA56596	42.5421	23.8858	41.7648	24.0625	38.4257	23.3558	38.0724	23.0024	37.878	22.5961	43.1251	22.3841	42.7365	21.7657	39.6447	20.1227	39.2384	20.1934	38.8674	20.3701	43.6728	24.3098	43.3195	24.4335	42.9308	24.4511	42.5598	24.4865	42.1711	24.5041	41.8001	24.4335	41.4291	24.4158	41.0581	24.3451	40.6871	24.2745	40.3161	24.1685	39.9628	24.0625	39.6094	23.9211	39.2384	23.7974	38.8851	23.6738	38.5847
Parthenia_20171109_SA56597	66.9265	46.5767	66.0845	46.524	61.7864	44.1206	61.4707	43.3663	61.5584	42.84	68.4879	44.9101	68.3124	44.1557	64.9266	40.3664	64.2425	40.1735	63.5057	40.191	68.523	47.5766	67.9791	47.6117	67.4528	47.524	66.9265	47.4187	66.4178	47.2433	65.9266	47.0328	65.4354	46.8223	64.9442	46.5942	64.4705	46.3311	64.0144	46.0504	63.5407	45.7872	63.1022	45.4715	62.6811	45.1381	62.2952	44.7697	61.9794
Parthenia_20171109_SA56598	62.7023	6.98251	62.3514	7.56146	58.9654	9.31586	58.3864	9.14042	58.018	8.94744	62.1058	5.33338	61.4566	5.15794	57.7198	5.50882	57.3338	6.00005	57.2285	6.38602	64.0707	6.49128	63.8952	6.8597	63.6672	7.19304	63.3689	7.47374	63.0356	7.71936	62.7023	7.92989	62.3514	8.14042	62.0005	8.35094	61.6321	8.50884	61.2636	8.70182	60.8952	8.84218	60.5093	9.01762	60.1408	9.15797	59.7373	9.24569	59.3338
Parthenia_20171109_SA56601	52.6742	28.2032	52.0052	28.3264	48.2729	27.4462	47.8856	26.9885	47.7096	26.5483	53.396	26.4603	52.9911	25.9146	49.7693	23.8724	49.3116	23.9252	48.8539	24.0308	54.065	28.7314	53.66	28.8546	53.2551	28.925	52.8326	28.925	52.4101	28.925	52.0052	28.8722	51.5827	28.8018	51.1777	28.749	50.7552	28.6785	50.3503	28.5729	49.963	28.4321	49.5757	28.2736	49.1708	28.1152	48.8011	27.9215	48.5018
Parthenia_20171109_SA56603	58.8534	26.2077	58.1166	26.1025	54.9591	24.5062	54.7661	24.0501	54.731	23.6291	59.9059	24.7693	59.6428	24.1027	57.0641	21.4363	56.5905	21.3486	56.1169	21.4539	59.9761	26.9796	59.5902	27.0498	59.1867	26.9971	58.8008	26.927	58.4149	26.8042	58.0465	26.6814	57.6956	26.4884	57.3273	26.3305	56.994	26.12	56.6431	25.9271	56.2923	25.7166	55.9765	25.4885	55.6608	25.2429	55.3626	24.9798	55.1345
Parthenia_20171109_SA56604	58.2514	16.3252	57.9864	16.9966	55.0712	20.0885	54.5411	20.1592	54.0464	20.1239	57.0146	14.5761	56.3256	14.6468	52.368	16.3076	52.1559	16.6963	51.9969	17.2263	59.3998	15.2475	59.3291	15.7069	59.2231	16.1662	59.0288	16.5903	58.7814	16.9966	58.4811	17.3676	58.1984	17.7387	57.8804	18.092	57.527	18.3924	57.1913	18.7281	56.8556	19.0461	56.5199	19.3818	56.1842	19.6998	55.7602	19.8942	55.3185
Eliza_20140724_SA18236	32.9689	41.7716	32.3875	42.0208	28.6339	41.5059	28.3017	41.1903	28.119	40.6588	33.5336	40.0609	33.2014	39.546	29.8298	37.8519	29.3813	37.935	28.8997	38.1509	34.0817	41.9876	33.7329	42.1536	33.3675	42.2699	32.9855	42.3529	32.5869	42.3696	32.2049	42.3862	31.8228	42.3529	31.4242	42.3363	31.0422	42.2699	30.6602	42.2367	30.2782	42.1536	29.9128	42.054	29.5308	41.9543	29.1654	41.8381	28.8498
Eliza_20140724_SA18237	46.5058	42.4496	45.7277	42.5158	42.5324	41.1913	42.2675	40.8602	42.2012	40.347	47.3667	41.0754	47.1349	40.347	44.4529	38.145	44.0555	38.0291	43.6085	38.145	47.4661	42.9297	47.1018	43.0125	46.7376	43.0125	46.3568	43.0125	45.9926	42.9628	45.6283	42.8469	45.2972	42.6979	44.9495	42.5655	44.6019	42.4165	44.2542	42.284	43.9065	42.135	43.5919	41.9529	43.2608	41.7708	42.9463	41.5721	42.6979
Eliza_20140724_SA18238	55.5839	14.9662	55.099	15.4846	51.6208	16.5715	51.2028	16.421	50.6342	16.12	55.3833	13.1602	54.6308	12.7923	51.0857	12.7254	50.6008	12.9428	50.2998	13.3609	56.9719	14.6652	56.721	14.9662	56.42	15.2505	56.0856	15.4511	55.7344	15.6351	55.3665	15.7856	54.9819	15.9193	54.6141	16.0531	54.2294	16.1702	53.8616	16.2872	53.477	16.3876	53.0924	16.4879	52.691	16.5548	52.2897	16.6049	51.9051
Eliza_20140724_SA18239	64.5963	18.3541	64.181	19.0351	61.1912	21.2276	60.4604	21.2276	59.8624	21.0283	63.7824	16.5768	62.9851	16.4107	59.3807	17.2246	58.8824	17.7727	58.6665	18.3208	65.7258	17.8558	65.5597	18.2212	65.3603	18.5534	65.078	18.8357	64.7624	19.0849	64.4468	19.3174	64.1478	19.5666	63.8156	19.7825	63.5	20.0317	63.2011	20.2974	62.8689	20.4967	62.52	20.6961	62.1712	20.8788	61.8058	21.0449	61.4238
Eliza_20140724_SA18241	58.8537	36.8919	58.0872	37.2751	53.7382	36.5919	53.3549	36.192	53.1883	35.6588	59.4536	34.9923	58.987	34.3758	55.0046	32.6595	54.5047	32.6761	54.1048	32.9761	60.2034	37.1418	59.8035	37.3751	59.3869	37.5584	58.937	37.6584	58.4871	37.6917	58.0206	37.6917	57.5707	37.6917	57.1041	37.6584	56.6542	37.5917	56.2043	37.5084	55.7711	37.3751	55.3212	37.2585	54.8713	37.1752	54.438	37.0418	54.0548
Eliza_20140724_SA18242	44.631	51.1693	43.9956	51.6208	39.4305	51.5205	38.9623	51.2362	38.7114	50.9185	44.9655	49.2965	44.5474	48.6777	40.2331	47.156	39.7984	47.2731	39.5141	47.5908	46.0189	51.3867	45.6511	51.6543	45.2163	51.8382	44.7481	51.9385	44.2966	52.0221	43.8284	52.0556	43.3769	52.1559	42.9087	52.1726	42.4404	52.1392	41.9722	52.1392	41.504	52.1225	41.0525	52.0723	40.5843	51.972	40.1662	51.7713	39.7482
Eliza_20140724_SA18245	54.7145	15.8494	54.3478	16.5827	51.4646	19.3159	51.0313	19.3492	50.4313	19.1659	53.6645	14.2994	52.7479	14.3161	49.248	15.916	48.9147	16.5327	48.9147	17.1493	55.8478	14.7827	55.8144	15.2327	55.6978	15.666	55.4811	16.0494	55.2311	16.416	54.9478	16.7493	54.6311	17.0827	54.3312	17.416	53.9812	17.6826	53.6812	18.0159	53.3645	18.3159	52.9812	18.5659	52.6479	18.8492	52.2479	19.0826	51.8313
Eliza_20140724_SA18246	46.4247	17.0129	45.5523	17.4323	40.7873	17.1303	40.2336	16.5767	39.9149	16.0733	46.9448	14.8653	46.2905	14.1942	41.8276	12.3989	41.1061	12.4828	40.5356	12.8184	48.0522	17.1639	47.5992	17.3988	47.1126	17.5666	46.6261	17.7176	46.1227	17.8015	45.6194	17.8686	45.116	17.8686	44.5959	17.8853	44.0926	17.8686	43.5725	17.835	43.0691	17.7679	42.5658	17.684	42.0624	17.6169	41.5591	17.4995	41.1229
Eliza_20140724_SA18249	38.3869	30.9062	37.6205	31.1561	33.6386	30.4563	33.272	30.1064	33.1387	29.6899	39.0201	29.1901	38.5536	28.4403	35.1214	26.5576	34.6049	26.6243	34.255	26.8242	39.6199	31.256	39.2367	31.4226	38.8201	31.5393	38.4036	31.5726	37.9704	31.5726	37.5539	31.5893	37.1207	31.5726	36.7042	31.506	36.2877	31.4226	35.8711	31.3393	35.4546	31.2394	35.0381	31.1227	34.6382	31.0228	34.2384	30.8728	33.8885
Eliza_20141013_SA50416	51.7455	5.96637	51.7455	6.80737	50.0635	10.3142	49.7144	10.5681	49.1908	10.6157	50.2222	4.98255	49.3177	5.23644	46.8423	8.07681	46.763	8.55285	46.9217	9.02889	52.1899	4.93495	52.2692	5.33165	52.2533	5.74422	52.2057	6.14092	52.1422	6.55348	52.047	6.95018	51.9518	7.34688	51.7932	7.72772	51.6027	8.09268	51.4282	8.45764	51.2378	8.82261	51.0315	9.18757	50.8252	9.53667	50.5554	9.85403	50.2698
Eliza_20141013_SA50418	7.76562	14.9219	8.45312	14.3906	12.7812	13	13.4375	13.2344	13.8906	13.6406	8.14062	17.2812	9.01562	17.7656	13.4844	17.9219	14.0781	17.5938	14.5781	17.0312	6.26562	15.3125	6.54688	14.9062	6.9375	14.6094	7.29688	14.2656	7.71875	14	8.17188	13.7969	8.625	13.625	9.07812	13.4219	9.5625	13.2812	10.0469	13.1719	10.5312	13.0469	11.0156	12.9844	11.5	12.875	12	12.875	12.4844
Eliza_20141013_SA50422	57.4211	21.6397	56.9696	22.2203	53.406	23.6876	52.9222	23.5425	52.4869	23.1878	57.0986	19.866	56.4053	19.5757	52.6965	19.866	52.3417	20.2369	52.0354	20.6722	58.5499	21.2689	58.3402	21.6075	58.05	21.8977	57.7436	22.1719	57.405	22.3976	57.0502	22.5911	56.6955	22.8008	56.3407	22.9943	55.9537	23.1394	55.5829	23.3006	55.1959	23.4296	54.8089	23.5748	54.4219	23.6876	54.0187	23.7199	53.6156
Eliza_20141013_SA50426	51.6217	41.4817	51.2155	40.7786	50.1687	36.607	50.4811	35.8415	50.9811	35.3415	53.7622	41.513	54.184	40.8099	55.059	36.5445	54.6528	35.9196	54.184	35.4977	51.8561	43.091	51.4967	42.7785	51.1998	42.4035	50.9967	41.9817	50.8249	41.5442	50.653	41.0911	50.5436	40.638	50.4343	40.1693	50.3249	39.7006	50.2155	39.2475	50.1687	38.7631	50.1374	38.2944	50.1062	37.8101	50.1218	37.3414	50.1999
Eliza_20141013_SA50427	61.1866	14.4276	60.9802	15.2212	58.8534	18.5544	58.3455	18.6655	57.9169	18.6655	59.774	13.0785	58.901	13.2531	55.8853	15.9037	55.7583	16.3323	55.7901	16.8561	61.9643	13.3801	61.9484	13.8086	61.8849	14.2213	61.7738	14.634	61.6151	15.0308	61.4088	15.3958	61.2183	15.7768	61.012	16.1577	60.7739	16.5069	60.5199	16.8402	60.2977	17.2052	60.012	17.5227	59.7263	17.8243	59.4089	18.1258	59.0597
Eliza_20141013_SA50431	48.575	16.3583	48.575	17.0302	47.2314	20.7643	46.8408	21.0768	46.3408	21.3424	46.9345	15.4365	46.3877	15.8427	43.9659	18.8269	43.9347	19.405	44.0909	19.9362	49.0906	15.1553	49.1687	15.5615	49.1375	15.9834	49.1062	16.3896	49.0437	16.8114	48.95	17.2176	48.8406	17.6239	48.7313	18.0145	48.575	18.4051	48.4032	18.78	48.2782	19.1863	48.0907	19.5612	47.8876	19.9206	47.6532	20.2643	47.372
Eliza_20141013_SA50433	26.665	11.1263	27.2205	11.65	28.9029	15.3482	28.8553	15.9672	28.5379	16.364	24.7921	11.6342	24.554	12.4119	24.8556	16.3958	25.2047	16.8402	25.6809	17.1418	26.3634	9.85651	26.7284	10.0787	27.03	10.3803	27.284	10.7295	27.522	11.0787	27.7443	11.4596	27.9506	11.8246	28.1411	12.2056	28.3474	12.5865	28.5061	12.9833	28.6331	13.396	28.7601	13.8086	28.8712	14.2213	28.887	14.6499	28.9029
Eliza_20141013_SA50434	47.1191	35.2996	46.3258	35.5852	42.1057	35.141	41.6139	34.7285	41.3125	34.2525	47.7219	33.3324	47.2301	32.6502	43.4225	30.6036	42.9148	30.6036	42.2644	30.8892	48.2137	35.8708	47.7854	35.966	47.3729	36.0611	46.9287	36.0929	46.5003	36.1246	46.072	36.1087	45.6277	36.077	45.1994	36.0294	44.771	35.966	44.3585	35.839	43.9302	35.728	43.5177	35.6328	43.0893	35.5376	42.6927	35.3631	42.2802
Eliza_20141013_SA50438	53.7275	31.5595	52.9329	32.068	48.7377	32.0045	48.2451	31.7025	47.8637	31.1781	54.0135	29.748	53.505	29.0646	49.564	27.6344	49.0714	27.7616	48.6265	28.0794	54.9988	31.7184	54.6491	31.9886	54.236	32.1793	53.8228	32.3382	53.3779	32.4176	52.9329	32.4971	52.488	32.5448	52.043	32.5607	51.5981	32.5924	51.1531	32.5765	50.7082	32.5289	50.2632	32.4653	49.8183	32.4017	49.3892	32.2905	48.9761
Eliza_20141013_SA50439	48.9969	35.9025	48.1556	36.0294	44.6321	34.1248	44.394	33.6328	44.394	33.1407	50.1555	34.22	49.8381	33.5852	47.0287	30.8234	46.5208	30.7599	46.0288	30.9821	50.1079	36.6167	49.6794	36.6802	49.2508	36.6326	48.8223	36.585	48.4096	36.4739	47.9969	36.331	47.616	36.1405	47.2192	35.966	46.8383	35.7914	46.4415	35.6168	46.0605	35.4104	45.6796	35.2041	45.2987	34.9978	44.9971	34.6962	44.7749
Eliza_20141013_SA50449	12.4531	14.9062	13.25	14.9219	16.3594	16.2969	16.5938	16.625	16.6719	17.0781	11.5	16.2188	11.8906	16.9219	14.2969	19.3594	14.75	19.4219	15.125	19.375	11.4062	14.3281	11.7656	14.2031	12.1406	14.1562	12.5312	14.1719	12.9062	14.2188	13.2656	14.3594	13.6094	14.5312	13.9531	14.6719	14.3125	14.8281	14.6406	15.0156	14.9844	15.1875	15.3125	15.375	15.625	15.5938	15.9219	15.8438	16.1875
Eliza_20141013_SA50452	4.30439	32.2908	4.38323	31.534	6.98478	27.8445	7.42626	27.6711	8.00964	27.813	5.67612	33.8202	6.54331	33.7098	10.0909	31.329	10.2012	30.8087	10.217	30.0992	3.45297	33.3787	3.46874	32.9057	3.57911	32.4485	3.73678	32.007	3.91022	31.5813	4.11519	31.1556	4.33592	30.7457	4.57243	30.3357	4.84047	29.9573	5.09274	29.5631	5.39231	29.2005	5.67612	28.8378	6.02299	28.5067	6.38563	28.2229	6.74828
Eliza_20141014_SA50458	40.0559	37.4373	39.1354	37.4215	35.1679	35.5488	34.8981	34.9775	34.914	34.3903	41.262	35.8186	41.1192	35.0092	38.1356	31.6448	37.6436	31.4861	36.9136	31.6607	41.2303	38.2943	40.7542	38.3419	40.2939	38.2784	39.8337	38.1832	39.3735	38.0721	38.9291	37.9293	38.4847	37.7389	38.0563	37.5484	37.6278	37.3421	37.231	37.0882	36.8184	36.866	36.4216	36.6121	36.0249	36.3582	35.6758	36.0408	35.3584
Eliza_20141014_SA50460	39.1831	36.5906	38.98	35.9191	38.246	32.296	38.5271	31.765	38.9176	31.4214	41.2601	36.5594	41.4944	35.9503	42.1659	32.3116	41.9473	31.765	41.6349	31.3277	39.4798	37.9181	39.1362	37.6838	38.8863	37.3559	38.6833	36.9967	38.5271	36.6219	38.4022	36.2158	38.2773	35.8254	38.1836	35.4194	38.1211	35.0133	38.0742	34.6073	38.0586	34.1856	38.043	33.7796	38.0586	33.3579	38.1055	32.9519	38.1836
Eliza_20141014_SA50461	23.7842	21.6865	24.5255	21.3395	28.6735	20.8033	29.1782	21.0241	29.5883	21.4815	23.5476	23.7526	24.352	24.3204	28.3738	25.5506	28.8785	25.3141	29.3359	24.9671	22.3174	21.7969	22.6486	21.4815	23.0587	21.2607	23.4687	21.0556	23.9104	20.9137	24.352	20.8033	24.8094	20.7717	25.2667	20.6613	25.7241	20.6613	26.1815	20.614	26.6389	20.5509	27.0963	20.5036	27.5537	20.4878	28.0111	20.5509	28.4527
Eliza_20141014_SA50465	55.0905	23.5393	54.4496	23.7796	50.8121	23.7636	50.3955	23.4752	50.1711	23.0425	55.411	21.8407	55.0104	21.3279	51.5813	20.0941	51.1646	20.2543	50.6999	20.5267	56.2282	23.6514	55.9077	23.8597	55.5552	24.004	55.1867	24.1161	54.8021	24.1962	54.4175	24.2283	54.049	24.2603	53.6644	24.2764	53.2798	24.2603	52.8952	24.2443	52.5106	24.2123	52.1261	24.1482	51.7575	24.0841	51.3729	23.9879	51.0364
Eliza_20141014_SA50466	54.2126	29.4379	53.3472	29.0533	50.7191	25.3836	50.7191	24.8227	51.0236	24.3099	56.0555	28.4764	56.2798	27.6431	54.8536	23.06	54.3568	22.7715	53.8921	22.7234	54.9497	30.8962	54.485	30.7359	54.0684	30.4956	53.6677	30.2232	53.2991	29.8866	52.9787	29.5341	52.6581	29.1655	52.3376	28.7969	52.0492	28.3963	51.7768	27.9957	51.5044	27.5951	51.248	27.1784	51.0556	26.7297	50.8954	26.265	50.8153
Eliza_20141014_SA50469	48.4286	24.6442	47.8714	25.0262	44.2735	25.663	43.8596	25.5038	43.4934	25.1854	48.4286	22.9566	47.8237	22.6064	44.3213	22.0014	43.8596	22.1766	43.4934	22.5427	49.7659	24.5646	49.4475	24.8034	49.0973	25.0103	48.747	25.1854	48.3809	25.3446	47.9988	25.4561	47.6008	25.5675	47.2187	25.663	46.8207	25.7426	46.4227	25.7904	46.0247	25.8063	45.6267	25.8222	45.2287	25.87	44.8307	25.8382	44.4486
Eliza_20141014_SA50470	56.7219	9.96786	56.5795	10.7273	54.2536	14.5246	53.6682	14.6986	53.1145	14.6986	55.2662	8.59135	54.4751	8.67046	51.0418	11.3286	50.7886	11.9614	50.7886	12.5785	57.6395	8.82868	57.6554	9.28751	57.5446	9.74635	57.3706	10.1735	57.2282	10.6324	56.9908	11.0279	56.7693	11.4393	56.6111	11.8665	56.358	12.2621	56.1206	12.6576	55.8358	13.0373	55.551	13.4012	55.2346	13.7493	54.8865	14.0499	54.491
Eliza_20141014_SA50471	13.2356	14.4734	13.791	13.9497	17.695	12.823	18.187	12.9817	18.5838	13.4101	13.4101	16.2985	14.045	16.5842	18.0283	17.0761	18.4409	16.8381	18.8059	16.4255	11.9025	14.648	12.1564	14.2989	12.4738	14.0291	12.823	13.7752	13.2038	13.5847	13.5847	13.4101	13.9815	13.2515	14.3623	13.0769	14.775	12.9658	15.1876	12.8547	15.6002	12.7753	16.0128	12.7119	16.4413	12.6643	16.8698	12.6801	17.2824
Eliza_20141014_SA50474	57.5805	18.3387	56.8063	18.2419	53.1773	15.9516	52.9676	15.3709	53.1773	14.9193	58.9515	16.8387	58.6773	16.0322	55.9031	12.5484	55.2902	12.3871	54.8063	12.5161	58.7579	19.3064	58.2902	19.3387	57.8225	19.3064	57.3547	19.1935	56.9192	19.0161	56.4999	18.8225	56.0967	18.5806	55.6612	18.3871	55.258	18.1613	54.8709	17.8871	54.4999	17.5967	54.1451	17.2742	53.7902	16.9838	53.4999	16.6129	53.3225
Eliza_20141014_SA50477	47.7064	24.9029	47.0494	25.1913	42.8028	25.1272	42.29	24.6465	42.0015	24.1977	48.0269	22.8516	47.5301	22.2908	43.4598	20.8005	42.9149	20.9928	42.4663	21.3293	49.1006	24.9509	48.748	25.2394	48.3474	25.4317	47.9147	25.5759	47.4661	25.656	47.0174	25.7201	46.5686	25.7201	46.12	25.7842	45.6552	25.7842	45.2065	25.7522	44.7578	25.7041	44.3091	25.64	43.8604	25.5599	43.4438	25.3996	43.0431
Eliza_20141014_SA50481	16.5459	41.7669	16.3724	40.9783	15.7099	36.2779	16.0727	35.7574	16.7036	35.4262	18.7068	41.9089	19.0853	41.2937	20.5049	36.4199	20.0475	35.9782	19.7005	35.647	16.4512	43.3127	16.1673	42.9026	15.8834	42.4925	15.7572	42.0035	15.6153	41.5303	15.5522	41.0256	15.4418	40.5366	15.3156	40.0476	15.2525	39.5587	15.2367	39.0539	15.2052	38.565	15.2052	38.0602	15.2683	37.5555	15.4102	37.0823	15.568
Eliza_20141014_SA50490	47.1565	21.5741	46.2941	21.7657	41.8228	21.1589	41.2	20.616	40.8966	19.9612	47.891	19.4502	47.4918	18.8115	43.3878	16.5119	42.5734	16.5599	41.8707	16.8952	48.913	21.9414	48.4659	22.1969	48.0028	22.4045	47.5078	22.5003	46.9968	22.5482	46.4858	22.5482	45.9907	22.4524	45.4797	22.3726	44.9847	22.2927	44.4737	22.1809	43.9786	22.0532	43.4996	21.9095	43.0045	21.7817	42.5254	21.622	42.0943
Eliza_20141014_SA50492	24.3687	38.6769	23.9695	38.0222	23.4904	34.1577	23.7778	33.6946	24.0333	33.3592	26.3808	38.7568	26.7321	38.134	27.4507	34.1737	27.1792	33.7585	26.8599	33.471	24.3527	40.0503	24.0813	39.7309	23.8417	39.3636	23.682	38.9644	23.5223	38.5651	23.4106	38.1499	23.2988	37.7347	23.2349	37.3196	23.171	36.8884	23.155	36.4732	23.155	36.042	23.155	35.6109	23.187	35.1797	23.2828	34.7645	23.4425
Eliza_20141014_SA50500	52.8438	38.2602	52.1138	38.0221	49.4002	34.8642	49.305	34.4357	49.3685	33.8486	54.637	37.1969	54.6687	36.3083	52.9707	32.1189	52.5423	31.8173	52.0662	31.865	53.5737	39.5455	53.1294	39.4662	52.7009	39.3075	52.336	39.0536	51.9868	38.7362	51.6695	38.4347	51.3521	38.0856	51.0347	37.7682	50.7332	37.435	50.4317	37.1017	50.1143	36.7685	49.8604	36.3876	49.6224	36.0068	49.4637	35.5783	49.3843
Eliza_20141014_SA50501	8.55065	15.095	9.49011	14.9199	13.646	15.5886	14.1396	16.0504	14.267	16.6077	8.08888	16.9739	8.80542	17.579	12.3085	19.3464	12.8658	19.2828	13.4231	19.1394	7.26089	14.7606	7.65896	14.5855	8.08888	14.4422	8.51881	14.3785	8.96465	14.3625	9.41049	14.3625	9.85634	14.3625	10.2863	14.4103	10.7162	14.4899	11.162	14.5695	11.5919	14.6651	12.0059	14.7925	12.4359	14.9199	12.8339	15.095	13.2161
Eliza_20141014_SA50502	50.0508	15.5798	49.7197	16.3051	46.897	18.9543	46.3609	19.0174	45.8089	18.9543	49.0416	13.9871	48.2058	14.0502	44.7682	15.5955	44.5474	15.9898	44.3424	16.4155	51.1389	14.7598	51.06	15.1698	50.8708	15.564	50.65	15.9267	50.4135	16.2736	50.1454	16.6048	49.83	16.8886	49.5462	17.204	49.2308	17.4721	48.9154	17.7559	48.5843	18.0082	48.2374	18.2763	47.9062	18.5286	47.5435	18.7336	47.1335
Eliza_20141014_SA50503	46.4604	22.8799	45.8554	23.262	42.0978	23.8989	41.6042	23.5964	41.2221	23.2461	46.4445	21.0489	45.919	20.6508	42.0341	19.9184	41.5246	20.1891	41.2221	20.619	47.7501	22.8162	47.4316	23.0869	47.0814	23.3098	46.7311	23.5168	46.333	23.6601	45.9509	23.7875	45.5369	23.8352	45.1389	23.9467	44.7249	24.0422	44.3268	24.1378	43.9129	24.1537	43.4989	24.1696	43.0849	24.1696	42.671	24.1378	42.2888
Eliza_20141014_SA50505	46.113	30.19	45.3965	30.3492	41.8775	29.8715	41.575	29.5372	41.3043	29.155	46.5907	28.5022	46.113	28.0404	42.8169	26.5436	42.3711	26.5755	42.0367	26.8143	46.941	30.6199	46.6225	30.7792	46.2722	30.8588	45.9219	30.8906	45.5557	30.8429	45.2054	30.8269	44.8392	30.7951	44.4889	30.7473	44.1386	30.6836	43.7882	30.604	43.422	30.5562	43.0876	30.4289	42.7533	30.3015	42.4348	30.1582	42.1163
Eliza_20141014_SA50506	15.7656	19.3906	16.5	19.1562	20.375	18.9375	20.8594	19.2031	21.1406	19.6875	15.4531	21.3438	16.1406	21.7656	19.9062	23.1094	20.4844	22.9844	21	22.6719	14.25	19.3594	14.5625	19.0469	14.9375	18.8125	15.3438	18.6562	15.7812	18.5781	16.2188	18.5156	16.6562	18.5	17.0938	18.4375	17.5469	18.4375	17.9844	18.4531	18.4219	18.4688	18.875	18.4531	19.3125	18.4844	19.7344	18.5938	20.1406
Eliza_20141014_SA50508	8.49572	25.1877	8.98434	24.5572	13.7287	22.0668	14.5799	22.2244	15.3207	22.7761	9.0001	27.4259	9.74092	27.5993	15.0842	27.7411	15.699	27.2525	16.03	26.5905	6.84071	25.629	7.10866	25.1404	7.47119	24.7306	7.91252	24.3838	8.36962	24.0843	8.84248	23.7849	9.3311	23.5169	9.7882	23.2174	10.2926	22.981	10.7812	22.7288	11.2856	22.5081	11.8215	22.3505	12.3574	22.2087	12.9091	22.1298	13.4607
Eliza_20141014_SA50509	27.8977	18.8357	28.8149	19.0729	31.9937	21.7614	32.1993	22.315	32.0096	22.9159	26.3952	20.1009	26.3636	21.0498	28.5144	24.703	29.0996	24.8928	29.7006	24.9403	26.9013	17.9184	27.36	17.9184	27.787	18.0449	28.2298	18.1714	28.6252	18.3928	29.0047	18.6301	29.3685	18.9147	29.7322	19.1836	30.0801	19.4683	30.4281	19.7688	30.7285	20.1009	31.0607	20.433	31.377	20.7493	31.6616	21.0972	31.8989
Eliza_20141014_SA50510	13.3082	32.2929	13.8916	31.8041	18.4486	29.5177	19.095	29.77	19.5996	30.1011	13.8443	34.7211	14.6642	34.9892	19.8046	34.9892	20.2776	34.4531	20.593	33.8224	11.6999	32.829	11.9679	32.3717	12.3148	31.9617	12.709	31.5991	13.1505	31.2995	13.6078	31.0157	14.0651	30.7476	14.5381	30.4953	15.0111	30.2588	15.4999	30.038	15.9888	29.8331	16.5091	29.6754	17.0137	29.5335	17.5498	29.4389	18.0701
Eliza_20141014_SA50511	19.6813	38.1761	19.7604	37.2743	21.4216	33.762	21.8804	33.5405	22.4025	33.5247	21.0578	39.2044	21.8804	38.9671	24.839	36.499	24.9181	35.882	24.8231	35.3758	18.9377	39.2044	18.827	38.7931	18.8112	38.3659	18.827	37.9388	18.9694	37.5274	19.1751	37.1477	19.3649	36.768	19.5073	36.3725	19.6813	35.9928	19.8554	35.5973	20.0768	35.2175	20.2825	34.8378	20.504	34.4898	20.7888	34.1575	21.1527
Eliza_20141014_SA50517	34.9687	41.1202	34.259	40.6943	32.2873	37.6975	32.4451	37.2558	32.6817	36.9088	36.5618	40.4577	36.688	39.6218	35.8047	36.1517	35.4104	35.8678	35.0003	35.8836	35.4104	42.1455	35.0634	41.9877	34.7321	41.7669	34.4167	41.5619	34.117	41.3095	33.8804	41.0098	33.6596	40.6943	33.4388	40.3789	33.2495	40.0476	33.0602	39.7006	32.8552	39.3852	32.6659	39.0382	32.5397	38.6754	32.4135	38.3126	32.382
Eliza_20141014_SA50522	60.9532	21.2413	60.4437	21.91	57.3706	24.394	56.7814	24.4259	56.2082	24.2826	60.1093	19.4579	59.2813	19.3783	55.3483	20.2859	55.1573	20.7636	54.8388	21.4642	62.0201	20.477	61.9405	20.9069	61.7812	21.3209	61.5265	21.6871	61.2399	22.0215	60.8896	22.2763	60.5392	22.547	60.2208	22.8336	59.8546	23.0883	59.5202	23.375	59.1539	23.6138	58.7718	23.8527	58.4056	24.0915	57.9916	24.2189	57.5616
Eliza_20141014_SA50525	13.3245	24.5467	13.5615	23.788	16.865	20.3107	17.7027	20.2633	18.4614	20.5478	14.7312	26.4592	15.5215	26.317	19.8681	24.7996	20.2949	24.0725	20.3897	23.2348	12.06	25.7954	12.0916	25.2896	12.2022	24.7838	12.4393	24.3254	12.7396	23.9145	13.0399	23.5035	13.3561	23.0926	13.6722	22.6974	14.0515	22.3497	14.4151	21.9861	14.8102	21.6542	15.2054	21.3381	15.6321	21.0536	16.0589	20.7533	16.5173
Eliza_20141014_SA50531	55.2924	3.36344	55.0095	4.14929	52.8248	7.40271	52.2433	7.65418	51.6461	7.55988	53.8779	1.98034	53.1077	2.2161	49.8543	4.38504	49.6814	4.95085	49.6343	5.42237	56.094	2.20038	56.1254	2.64046	56.0468	3.06481	55.9368	3.48917	55.7482	3.89782	55.5439	4.27502	55.3238	4.65223	55.0724	5.01372	54.8209	5.37521	54.5537	5.72099	54.2865	6.06676	54.0036	6.41254	53.7207	6.74259	53.3906	7.04122	53.0292
Eliza_20141014_SA50534	60.3422	11.6755	59.911	12.2825	56.461	13.8318	56.0298	13.7199	55.6624	13.5123	59.8151	9.95056	59.1603	9.71098	55.4708	10.1742	55.1513	10.4617	54.9117	10.9248	61.3325	11.1005	61.2047	11.4839	60.9492	11.8033	60.6776	12.0908	60.3742	12.3623	60.0547	12.6019	59.7033	12.8095	59.352	13.0012	58.9846	13.1769	58.6172	13.3366	58.2339	13.4804	57.8506	13.6081	57.4673	13.7359	57.068	13.8158	56.6687
Eliza_20141014_SA50537	58.3613	21.332	57.7582	21.697	53.7902	21.8875	53.2823	21.5859	53.0125	21.205	58.6629	19.4432	58.0122	18.9036	54.1711	17.8401	53.5997	18.0306	53.3299	18.4433	59.8216	21.2685	59.52	21.5859	59.1549	21.824	58.774	22.0303	58.3296	22.1097	57.9011	22.1732	57.4566	22.1573	57.0281	22.2208	56.5996	22.2367	56.1551	22.2684	55.7107	22.2684	55.2822	22.2208	54.8378	22.1732	54.4092	22.1097	53.9965
Eliza_20141014_SA50540	61.6379	20.5247	61.2717	21.3209	58.2463	24.3622	57.6253	24.3622	57.1476	24.0756	60.38	18.6618	59.5202	18.7414	55.5872	20.6203	55.3961	21.1617	55.4439	21.703	62.7207	19.5534	62.6411	20.0152	62.4978	20.4611	62.2749	20.8751	62.0042	21.2572	61.7335	21.6394	61.4309	22.0056	61.1125	22.34	60.7781	22.6744	60.4437	22.9928	60.0934	23.2953	59.7272	23.5979	59.345	23.8686	58.9469	24.1074	58.5011
Eliza_20141014_SA50544	6.13694	23.3017	6.77556	22.8344	10.654	22.1335	11.1213	22.3827	11.682	22.85	6.24598	25.2487	6.90017	25.6848	10.8876	26.1677	11.3393	25.8406	11.7599	25.4979	4.76626	23.4886	5.04662	23.1615	5.40487	22.9123	5.7787	22.6787	6.1681	22.4917	6.57307	22.3516	6.99362	22.2425	7.41418	22.1335	7.8503	22.04	8.27086	21.9466	8.69141	21.8843	9.12754	21.8531	9.56366	21.8531	9.99979	21.8843	10.4048
Eliza_20141014_SA50548	17.2817	37.5342	16.6588	36.9912	14.9178	33.7488	14.9977	33.3495	15.1255	32.9662	18.9268	36.9752	19.1345	36.2405	18.4317	32.7107	18.0324	32.4072	17.6171	32.2954	17.8567	38.6522	17.4893	38.5245	17.1699	38.2689	16.8824	37.9814	16.6109	37.6779	16.4032	37.3266	16.1637	36.9912	15.9401	36.6398	15.7484	36.2884	15.5727	35.921	15.413	35.5377	15.2213	35.1863	15.0616	34.803	14.9498	34.4037	14.9178
Eliza_20141014_SA50556	4.25396	9.61904	5.26984	9.6984	8.49206	11.6825	8.7619	12.3333	8.71428	12.746	3.07936	10.9841	3.25396	11.9206	5.69841	14.9365	6.28571	15.127	6.73015	15.0476	3.20635	8.73015	3.63492	8.66666	4.06349	8.71428	4.49206	8.79364	4.90476	8.9365	5.28571	9.14285	5.66666	9.3492	6.04761	9.55555	6.41269	9.79364	6.77777	10.0159	7.14285	10.2698	7.47618	10.5397	7.79364	10.8254	8.1111	11.1428	8.38094
Eliza_20141014_SA50559	32.3422	31.8061	31.8061	31.2857	29.9138	28.2265	29.9453	27.6746	30.103	27.2331	34.0453	31.1753	34.1557	30.4184	33.3514	26.76	33.0676	26.4446	32.6734	26.2238	32.9099	32.9572	32.5314	32.7995	32.2003	32.563	31.8849	32.3107	31.6168	32.0111	31.3803	31.6957	31.1753	31.333	30.9545	31.0019	30.7653	30.6392	30.5761	30.2765	30.4026	29.9138	30.2449	29.5511	30.1188	29.1569	30.0084	28.7784	29.9926
Eliza_20141015_SA50603	61.871	22.686	61.1836	23.1235	57.4026	23.9047	56.7307	23.6235	56.3401	23.2329	61.871	21.0299	61.1992	20.4362	57.4182	19.7487	56.9339	20.03	56.5276	20.3737	63.1835	22.5454	62.871	22.8267	62.5272	23.061	62.1523	23.2641	61.7617	23.4204	61.3554	23.5454	60.9492	23.6235	60.5274	23.7172	60.1212	23.7797	59.6993	23.8735	59.2775	23.9203	58.8712	23.9516	58.4494	23.9828	58.0275	23.9828	57.6057
Eliza_20141015_SA50606	20.3587	17.7018	21.2233	17.6547	24.509	18.8809	24.7763	19.3526	25.0593	19.777	19.5569	19.2111	19.8399	19.9657	22.9684	22.0723	23.4715	22.0408	23.9274	21.9622	19.1796	17.1831	19.5569	17.0573	19.9657	17.0573	20.3744	17.0573	20.7832	17.1202	21.1605	17.2145	21.5692	17.3088	21.9465	17.4346	22.3238	17.5918	22.7011	17.7333	23.0784	17.8748	23.4557	18.032	23.8173	18.2206	24.1475	18.4565	24.4619
Eliza_20141015_SA50607	55.0122	41.0476	54.2443	40.6244	51.8463	37.0196	51.8933	36.4084	52.1127	35.7501	57.0654	40.2169	57.2535	39.2922	56.1407	35.1702	55.6705	34.7314	55.0436	34.4649	55.9056	42.4111	55.4511	42.2387	55.0436	42.0036	54.6518	41.7215	54.3069	41.3924	53.9778	41.0319	53.6644	40.6871	53.3509	40.311	53.0845	39.9191	52.818	39.5273	52.5829	39.1041	52.3635	38.681	52.1597	38.2421	52.003	37.7876	51.9246
Eliza_20141015_SA50610	28.9659	39.7991	28.6881	39.1356	28.0554	35.1541	28.3794	34.5677	28.7344	34.3053	31.0955	39.8454	31.4196	39.151	32.33	35.1387	32.0986	34.5985	31.6047	34.151	29.1819	41.2806	28.8733	40.972	28.6264	40.5862	28.4566	40.1849	28.3023	39.7683	28.1634	39.3362	28.0708	38.9041	27.9628	38.472	27.9165	38.0244	27.8548	37.5924	27.8085	37.1448	27.8085	36.6973	27.8085	36.2652	27.8702	35.8177	27.9782
Eliza_20141015_SA50615	5.13305	18.7949	6.12807	18.6053	10.4082	20.2637	10.7083	20.8007	10.8189	21.3219	4.09065	20.5322	4.4697	21.3693	7.92859	24.2596	8.60773	24.3386	9.14473	24.228	3.83794	18.0367	4.32756	17.942	4.81717	17.9104	5.32258	17.9262	5.81219	18.021	6.30181	18.0999	6.77563	18.2421	7.23365	18.4158	7.69168	18.6053	8.13391	18.8264	8.59194	19.0318	9.03417	19.2529	9.46061	19.5056	9.87125	19.7899	10.2661
Eliza_20141015_SA50616	6.64535	31.8319	7.24093	31.0952	10.1875	28.9167	10.689	28.9324	11.0965	29.1518	7.58573	33.5402	8.49477	33.6186	12.0839	32.4901	12.4914	32.1296	12.6011	31.6281	5.59526	32.5058	5.70497	32.114	5.90872	31.7378	6.14382	31.4087	6.41026	31.0796	6.69237	30.7974	7.00583	30.5153	7.33496	30.2646	7.67977	30.0451	8.02458	29.7944	8.36938	29.575	8.72986	29.3712	9.10601	29.1988	9.48217	29.0264	9.88966
Eliza_20141015_SA50617	58.5973	33.0796	57.7905	32.8423	54.5948	30.5168	54.4208	29.8682	54.5157	29.2986	59.9894	31.5293	59.7996	30.8332	57.4266	27.5901	56.9362	27.3844	56.3034	27.4002	59.6098	33.9814	59.1826	33.9814	58.7555	33.8706	58.3442	33.7282	57.9487	33.5384	57.5848	33.3169	57.2209	33.0796	56.8413	32.8423	56.4932	32.605	56.1452	32.3361	55.7971	32.0671	55.4649	31.7982	55.1485	31.4976	54.8638	31.1654	54.6897
Eliza_20141015_SA50622	15.0293	37.4483	15.5761	36.9484	18.7164	35.8079	19.2319	35.9329	19.685	36.1985	15.4199	39.0419	16.1386	39.245	19.4663	39.0419	19.8568	38.7294	20.1849	38.3545	13.9357	37.792	14.1388	37.4796	14.4044	37.2296	14.7012	36.9953	15.0137	36.8078	15.3418	36.6203	15.6699	36.4641	16.0136	36.3391	16.3729	36.2141	16.7166	36.0891	17.0759	35.9798	17.4353	35.9017	17.7946	35.8079	18.1539	35.761	18.5289
Eliza_20141015_SA50623	41.6718	32.3313	41.0293	31.9239	38.9763	28.8678	38.9919	28.3193	39.18	27.9118	43.3801	31.6731	43.5055	30.9835	42.6278	27.4573	42.2674	27.1439	41.7659	26.9402	42.2831	33.3814	41.9226	33.2246	41.5935	33.0052	41.2644	32.7702	40.9666	32.5037	40.7002	32.2216	40.4338	31.9239	40.23	31.5791	40.0263	31.2343	39.7912	30.9209	39.5875	30.5761	39.3994	30.2313	39.1957	29.8865	39.039	29.526	38.9763
Eliza_20141015_SA50624	51.6458	27.1474	51.0032	27.0533	47.837	25.5173	47.6176	25.0471	47.649	24.5455	52.743	25.7054	52.5236	25.1411	50.0157	22.6176	49.6082	22.5862	49.138	22.6489	52.7744	27.8213	52.3825	27.8684	52.0063	27.8527	51.6145	27.8057	51.2383	27.7116	50.8778	27.5862	50.5173	27.4295	50.1568	27.2728	49.812	27.1003	49.4828	26.9123	49.1537	26.6928	48.8245	26.4734	48.511	26.2539	48.2289	25.9875	47.9781
Eliza_20141015_SA50627	47.9841	29.127	47.3492	29.6031	43.8412	30.1746	43.4444	29.9841	43.1587	29.6825	48.0634	27.3174	47.365	27.0793	43.9365	26.5079	43.492	26.6825	43.0952	26.9365	49.238	28.9682	48.9841	29.2698	48.6666	29.5079	48.3333	29.6984	47.9682	29.8571	47.5873	29.9682	47.2063	30.0635	46.8254	30.1428	46.4285	30.1904	46.0317	30.2222	45.6507	30.2539	45.2539	30.2698	44.8571	30.2857	44.4603	30.2698	44.0793
Eliza_20141015_SA50635	42.6565	35.7698	42.2949	35.2352	41.0685	32.0592	41.1314	31.5875	41.3515	31.0844	44.4489	35.534	44.7162	34.8893	44.6848	31.3517	44.3546	30.9114	43.9772	30.6441	42.971	37.1849	42.6879	36.9176	42.4364	36.6189	42.1848	36.3044	41.9961	35.9585	41.8075	35.6126	41.6502	35.251	41.4773	34.9051	41.3515	34.5277	41.2257	34.1661	41.0999	33.7887	41.0056	33.4114	40.9112	33.0183	40.8641	32.6409	40.9899
Eliza_20141015_SA50638	56.2512	35.9752	55.7045	35.4909	53.6113	32.0855	53.6738	31.4451	53.9862	30.9452	58.0633	35.3191	58.1257	34.663	57.4228	30.5859	57.0635	30.1173	56.6261	29.883	56.7667	37.3498	56.3606	37.2092	55.9857	36.9749	55.6732	36.6625	55.4077	36.3188	55.1578	35.9595	54.8922	35.6003	54.6423	35.241	54.4079	34.8661	54.1736	34.5068	53.9862	34.1006	53.83	33.6945	53.7206	33.2727	53.6425	32.8353	53.6738
Eliza_20141015_SA50642	51.9372	34.2568	51.464	33.7836	50.1707	30.0614	50.4073	29.5725	50.6597	29.0363	53.9087	33.8625	54.0664	33.2631	54.0191	29.2413	53.6406	28.847	53.2778	28.5315	52.3788	35.7394	51.9845	35.5501	51.6691	35.2346	51.4009	34.8877	51.1801	34.5091	50.9436	34.1306	50.7701	33.7205	50.6123	33.3105	50.4704	32.9004	50.3127	32.4745	50.1865	32.0645	50.0761	31.6229	49.9657	31.197	49.9657	30.7554	50.0603
Eliza_20141015_SA50644	30.4574	34.8242	30.4099	34.0806	30.932	30.5681	31.2959	30.1884	31.7706	30.0143	32.1187	35.3622	32.6566	34.9033	34.3654	31.8022	34.2705	31.3117	34.0806	30.8687	30.1409	35.9792	29.9669	35.6311	29.8878	35.2514	29.8245	34.8717	29.8086	34.492	29.8245	34.0964	29.8719	33.7167	29.9194	33.337	29.9985	32.9572	30.0618	32.5775	30.1726	32.1978	30.2991	31.8339	30.3941	31.47	30.5523	31.1219	30.7896
Eliza_20141015_SA50646	30.4393	19.514	29.743	19.2664	27.0039	16.9296	26.8027	16.4499	26.8801	15.9392	31.8166	18.3998	31.7083	17.6725	29.7739	14.562	29.3406	14.3608	28.8145	14.2525	31.3833	20.4734	30.9964	20.396	30.6095	20.2722	30.2382	20.102	29.8822	19.9163	29.5418	19.6997	29.2323	19.4521	28.9228	19.189	28.6442	18.9105	28.3502	18.6319	28.0562	18.3533	27.7621	18.0593	27.4681	17.7963	27.2205	17.4868	27.0967
Eliza_20141015_SA50653	31.1181	38.82	30.8541	38.1989	30.3262	34.4877	30.6678	34.0218	31.0871	33.5715	33.1833	38.9442	33.4939	38.3231	34.3169	34.5809	34.1305	34.0218	33.7889	33.5405	31.2423	40.202	30.9473	39.9225	30.7299	39.5653	30.5591	39.1927	30.4504	38.8045	30.3417	38.4007	30.2641	37.997	30.1709	37.6088	30.1398	37.1896	30.1088	36.7858	30.0933	36.3821	30.0933	35.9628	30.1088	35.5591	30.1554	35.1399	30.2641
Eliza_20150210_SA51500	41.8955	39.5227	41.2684	40.2007	37.2856	42.0819	36.5568	42.031	36.0823	41.7429	41.4887	37.4381	40.6413	37.0653	36.1162	37.167	35.523	37.5907	35.201	38.1161	43.4547	39.2516	43.1835	39.6414	42.8106	39.9634	42.4208	40.2515	42.0141	40.5057	41.5904	40.7599	41.1667	40.9803	40.726	41.1836	40.2684	41.3531	39.8109	41.5057	39.3533	41.6582	38.8957	41.8107	38.4381	41.9463	37.9635	42.0141	37.472
Eliza_20141016_SA50877	40.2716	38.1427	39.5942	38.4814	35.9332	38.7395	35.4816	38.5298	35.2074	38.2556	40.3845	36.3686	39.7555	35.9171	36.2074	35.2881	35.7558	35.53	35.4655	35.7396	41.6425	38.046	41.3522	38.3363	40.9974	38.5459	40.5942	38.6749	40.191	38.804	39.7878	38.8524	39.3846	38.933	38.9652	38.9975	38.5459	38.9975	38.1427	39.0136	37.7234	39.0298	37.3041	39.0459	36.8847	39.0298	36.4815	38.9491	36.0945
Eliza_20170913_SA56455	65.6898	29.6985	64.9732	30.118	61.145	30.2229	60.6556	29.9258	60.306	29.5762	65.8821	27.8456	65.2179	27.3912	61.4247	26.4822	61.0751	26.622	60.6731	26.8668	67.0533	29.8034	66.7561	30.1006	66.3716	30.2754	65.9695	30.4327	65.5675	30.5376	65.148	30.6075	64.7284	30.6424	64.2914	30.6599	63.8719	30.6599	63.4524	30.6424	63.0329	30.6424	62.5959	30.625	62.1764	30.5725	61.7743	30.4676	61.3898
Eliza_20141016_SA50798	50.9263	40.2753	49.9166	40.5033	45.5194	38.5652	45.2099	38.0115	44.9819	37.3438	51.9686	38.4838	51.7243	37.5392	48.2554	34.2495	47.6691	34.2657	47.0177	34.168	52.2292	41.1547	51.7406	41.285	51.2195	41.3013	50.7146	41.3013	50.226	41.171	49.7049	41.0896	49.2326	40.9267	48.744	40.7801	48.2717	40.5684	47.8157	40.3404	47.3597	40.1124	46.92	39.8356	46.4965	39.5587	46.122	39.2167	45.8125
Eliza_20161028_SA55187	43.272	27.7853	42.7648	28.3106	39.5226	29.18	39.0879	28.9808	38.798	28.7453	43.1633	26.3544	42.6018	26.0103	39.2328	25.5937	38.8524	25.9378	38.5626	26.3001	44.5218	27.7129	44.2863	28.0027	43.9784	28.2201	43.6523	28.4012	43.3263	28.5642	42.964	28.6729	42.6018	28.7816	42.2395	28.854	41.8773	28.9446	41.515	29.0714	41.1527	29.1438	40.7905	29.2344	40.4282	29.3249	40.0478	29.3249	39.6856
Eliza_20171117_SA56913	53.918	11.5675	53.2037	12.1424	49.2492	13.0135	48.6743	12.7696	48.3084	12.4386	53.796	9.63381	52.9947	9.25055	48.9879	8.86729	48.5001	9.07634	48.1168	9.42476	55.3117	11.4804	55.0155	11.8114	54.6671	12.0902	54.2838	12.3166	53.8832	12.4909	53.4476	12.6302	53.0295	12.7348	52.594	12.8567	52.1585	12.9264	51.7229	13.0309	51.2874	13.118	50.8519	13.1877	50.399	13.2051	49.9634	13.1703	49.5279
Eliza_20150212_SA51784	40.7209	43.6689	40.014	43.7379	36.8419	42.5656	36.5143	42.1863	36.4971	41.8415	41.5484	42.1863	41.2381	41.6174	38.6176	39.5486	38.1349	39.5141	37.7728	39.6003	41.6691	44.2896	41.307	44.324	40.945	44.324	40.6002	44.2896	40.2382	44.2378	39.8934	44.1344	39.5486	44.0482	39.2038	43.9275	38.8762	43.7896	38.5314	43.6689	38.2038	43.5138	37.8763	43.3586	37.566	43.2034	37.2729	42.9793	37.0143
Eliza_20160524_SA54375	33.7684	10.3697	33.3222	10.8159	30.5201	11.976	29.9668	11.9403	29.6277	11.7618	33.2865	8.85261	32.644	8.87046	29.5384	9.10248	29.1815	9.42374	28.9673	9.7807	34.9107	10.0306	34.6787	10.2804	34.4288	10.5125	34.1611	10.7088	33.8755	10.9051	33.5721	11.0479	33.2687	11.1907	32.9653	11.3335	32.644	11.4584	32.3227	11.5834	32.0015	11.6904	31.6802	11.7797	31.3768	11.9225	31.0377	11.976	30.6986
Eliza_20141016_SA50846	50.6908	23.8583	50.0799	23.9708	46.977	23.0383	46.6555	22.6686	46.559	22.3149	51.3178	22.54	51.0123	21.9773	48.231	20.2731	47.7969	20.3374	47.4593	20.4499	51.5911	24.2763	51.2535	24.3406	50.9159	24.3567	50.5782	24.3567	50.2567	24.3406	49.9191	24.2602	49.5975	24.1637	49.276	24.0833	48.9545	23.9869	48.6168	23.8904	48.3114	23.7779	47.9898	23.6653	47.6844	23.5207	47.3789	23.3599	47.1378
Eliza_20151118_SA53589	68.6921	7.06485	68.4204	7.75322	66.6994	10.398	66.2828	10.561	65.7212	10.6516	67.5508	5.97795	66.8625	6.21345	64.4169	8.3329	64.272	8.80389	64.2358	9.22053	69.4348	6.10475	69.5254	6.46706	69.471	6.81124	69.3804	7.17354	69.2536	7.51773	69.0544	7.82568	68.837	8.11552	68.6377	8.42347	68.4385	8.73143	68.2392	9.03938	68.0218	9.34734	67.7863	9.61907	67.5327	9.89079	67.2791	10.1444	66.9349
Eliza_20161103_SA55450	36.4249	33.5008	35.5224	33.5008	32.2734	32.1831	32.0388	31.7499	31.8943	31.2987	37.4357	32.0568	37.1649	31.2265	34.4033	28.862	33.934	28.8439	33.4466	28.88	37.3635	34.1686	36.9845	34.2047	36.6054	34.2047	36.2263	34.1506	35.8473	34.0603	35.4863	33.934	35.1253	33.8077	34.7824	33.6452	34.4213	33.5189	34.0603	33.3564	33.7174	33.194	33.3564	33.0496	33.0315	32.8691	32.7246	32.6344	32.4719
Eliza_20170906_SA56383	61.19	25.718	60.4707	26.0338	55.9797	26.1917	55.3833	25.8233	55.0499	25.2795	61.6461	23.7181	61.19	23.1217	56.9621	21.2621	56.2429	21.4375	55.6639	21.7182	62.6987	26.104	62.2952	26.332	61.8391	26.4899	61.383	26.5952	60.9268	26.6654	60.4532	26.7004	59.9795	26.7531	59.5234	26.7531	59.0497	26.7004	58.5761	26.718	58.12	26.7004	57.6463	26.6478	57.1726	26.5952	56.7341	26.4548	56.2955
Eliza_20171117_SA56868	58.6281	13.8194	58.2809	14.4964	55.8851	17.3263	55.3295	17.3436	54.9128	17.17	57.4128	12.3437	56.6837	12.4305	53.4024	14.3055	53.2635	14.8263	53.333	15.3471	59.7045	12.7777	59.6698	13.1944	59.5309	13.5937	59.3573	13.993	59.1489	14.3402	58.8712	14.67	58.6107	14.9999	58.3156	15.3124	58.0725	15.6596	57.7948	15.9721	57.4649	16.2499	57.1698	16.545	56.8399	16.8054	56.4927	17.0485	56.1108
Eliza_20141016_SA50748	41.2811	31.4141	40.938	32.0676	37.7035	33.7338	37.2461	33.8155	36.854	33.5705	40.693	29.7642	39.9415	29.6498	36.4946	30.3686	36.1842	30.6137	36.0045	30.9894	42.3756	31.0221	42.2449	31.3815	42.0325	31.7082	41.7875	32.0022	41.4934	32.2473	41.1504	32.4433	40.8237	32.6393	40.4969	32.8517	40.1702	33.0314	39.8108	33.1948	39.4678	33.3581	39.1084	33.4888	38.7327	33.5868	38.3569	33.6522	37.9649
Eliza_20161028_SA55186	40.7877	22.0304	40.5359	22.6778	38.5217	25.1776	38.0541	25.2855	37.6405	25.1416	39.6907	20.8255	39.0253	20.9514	36.2378	22.7318	36.0579	23.1274	36.1478	23.4511	41.615	21.2031	41.615	21.5628	41.5071	21.9225	41.3812	22.2642	41.2193	22.5879	41.0395	22.9116	40.8417	23.1994	40.6079	23.4871	40.3741	23.7569	40.1763	24.0626	39.9245	24.3503	39.6727	24.6021	39.385	24.8359	39.0612	24.9978	38.7196
Eliza_20170913_SA56505	44.4043	7.28999	43.8099	7.79697	40.2261	8.46129	39.6317	8.21654	39.2646	7.81445	44.3693	5.52431	43.7749	5.03482	40.1562	4.49287	39.5618	4.79007	39.1422	5.17467	45.7329	7.32496	45.4532	7.62215	45.121	7.84942	44.7714	8.02424	44.3868	8.16409	44.0022	8.28647	43.6001	8.37388	43.2155	8.40884	42.8134	8.49625	42.4113	8.5487	42.0092	8.56618	41.6072	8.60114	41.2051	8.61863	40.803	8.61863	40.4184
Eliza_20141015_SA50715	41.5	31.3281	41	31.7969	37.5	33.625	36.9062	33.5	36.4844	33.125	40.9688	29.5469	40.2344	29.5156	36.3906	29.8125	35.8438	30.25	35.7188	30.7656	42.75	30.9688	42.5312	31.3125	42.25	31.625	41.9375	31.9062	41.6094	32.1406	41.25	32.375	40.875	32.5469	40.5156	32.7344	40.1406	32.9375	39.7812	33.125	39.3906	33.2812	39	33.4219	38.6094	33.5625	38.2031	33.6562	37.7969
Eliza_20170913_SA56458	46.4886	35.2366	45.7048	35.7417	41.4723	36.0378	41.0194	35.7243	40.8104	35.254	46.6454	33.4077	45.8964	32.92	41.8555	31.8401	41.4026	32.0317	41.1065	32.3801	47.9518	35.4805	47.586	35.7592	47.1679	35.9682	46.7325	36.1424	46.2796	36.2469	45.8268	36.2991	45.3565	36.3165	44.9036	36.3688	44.4333	36.4036	43.963	36.4036	43.5102	36.4036	43.0399	36.3688	42.587	36.3339	42.1341	36.2294	41.6987
Eliza_20150818_SA53196	42.4919	17.3115	42.0105	17.941	38.9926	19.5333	38.5112	19.5148	38.0854	19.2926	41.918	15.5526	41.2144	15.386	37.7521	16.071	37.4003	16.3487	37.2522	16.8857	43.6399	16.7561	43.5102	17.1264	43.2696	17.4411	42.9918	17.7189	42.6956	17.9781	42.3438	18.1817	42.0105	18.3669	41.6773	18.5705	41.307	18.7187	40.9737	18.9408	40.6219	19.1075	40.2516	19.2371	39.8998	19.4037	39.511	19.5148	39.1222
Eliza_20160304_SA54224	61.2952	24.1041	60.3304	24.1392	56.6639	22.455	56.4183	22.0866	56.3306	21.613	62.4355	22.3849	62.0847	21.4726	58.8568	18.9114	58.2778	18.8587	57.9445	19.0342	62.5233	24.7181	62.0847	24.7707	61.6461	24.7707	61.19	24.7356	60.7514	24.6479	60.3304	24.5251	59.9093	24.3848	59.4883	24.2444	59.0848	24.069	58.6813	23.876	58.2778	23.6831	57.8744	23.4901	57.506	23.2445	57.1551	22.9813	56.8569
Eliza_20170913_SA56451	37.8338	63.7404	37.2725	64.2139	33.2909	66.88	32.4841	66.6871	32.0982	66.3889	37.0269	61.5303	36.2727	61.5654	31.5369	62.1618	31.0984	62.7581	31.0283	63.4422	39.6229	63.1615	39.3422	63.5825	38.9739	63.9684	38.588	64.3016	38.1846	64.6174	37.7636	64.898	37.3251	65.1786	36.9042	65.4768	36.4481	65.7224	35.9921	65.9679	35.5185	66.1784	35.0625	66.4064	34.6064	66.6345	34.0978	66.7748	33.5891
Eliza_20150210_SA51498	60.5504	25.7184	59.6975	25.9191	54.8816	25.0161	54.3131	24.5479	54.1124	24.0128	61.353	23.762	60.8514	22.976	56.604	20.4008	55.7846	20.4176	55.2662	20.6517	61.838	26.4876	61.353	26.6047	60.8681	26.6716	60.3664	26.6381	59.8815	26.5713	59.3965	26.4876	58.9116	26.4208	58.4099	26.3539	57.925	26.2703	57.4401	26.1867	56.9551	26.0696	56.4869	25.9191	56.0187	25.7519	55.5839	25.5345	55.1993
Eliza_20161028_SA55185	47.6015	62.2827	47.1521	62.8632	43.5005	64.2676	42.9574	64.0242	42.5642	63.7246	47.1895	60.5599	46.4779	60.2977	42.4893	60.5786	42.2084	60.9531	42.096	61.2715	48.9123	62.0392	48.6876	62.4138	48.4067	62.7134	48.0696	62.9943	47.7326	63.2377	47.3768	63.4624	46.9835	63.6309	46.609	63.8369	46.2158	63.9867	45.8038	64.0991	45.3918	64.2302	44.9799	64.3425	44.5679	64.4174	44.1372	64.38	43.7252
Eliza_20150210_SA51591	30.0655	19.7631	29.4763	20.386	25.7392	22.4566	25.1668	22.3387	24.8807	22.0525	29.3753	17.7767	28.5336	17.5747	24.2746	18.1302	23.8033	18.5174	23.6854	19.0561	31.3786	19.2918	31.1597	19.6958	30.8736	20.0493	30.5369	20.3523	30.1497	20.6048	29.7625	20.8573	29.3922	21.1267	28.9881	21.3455	28.5841	21.5644	28.197	21.8	27.7761	21.9852	27.3553	22.1535	26.9344	22.3219	26.4799	22.4229	26.0254
Eliza_20141016_SA50801	59.1898	31.3851	58.4317	31.2399	55.2061	29.9981	54.9158	29.6271	54.8836	29.1756	60.0929	29.9981	59.8994	29.3207	57.1415	26.966	56.6738	26.9176	56.1738	27.0467	60.1252	31.998	59.7542	32.0302	59.3833	32.0302	59.0124	31.9818	58.6414	31.9012	58.2866	31.7883	57.9318	31.6754	57.577	31.5464	57.2383	31.4012	56.8996	31.2399	56.5609	31.0787	56.2383	30.869	55.9319	30.6755	55.6255	30.4497	55.3836
Eliza_20161028_SA55203	39.3472	43.097	38.643	43.1146	35.386	41.2837	35.2452	40.8788	35.2276	40.4035	40.4563	41.7943	40.245	41.0901	37.6747	38.3613	37.2698	38.3085	36.7944	38.3085	40.4563	43.8893	40.0514	43.8717	39.6465	43.8541	39.2415	43.7836	38.8366	43.678	38.4669	43.5372	38.0796	43.3963	37.7275	43.2027	37.3754	42.9914	37.0057	42.7978	36.6712	42.5865	36.3367	42.34	36.0198	42.0936	35.7381	41.7767	35.4917
Eliza_20170911_SA56415	36.4719	71.4526	35.4193	71.4	31.1564	69.6633	30.8231	69.0843	30.7003	68.523	37.7876	69.6106	37.5245	68.6107	34.0159	65.3126	33.3843	65.3477	32.7528	65.5231	37.6824	72.207	37.1912	72.2245	36.7	72.2245	36.2088	72.1368	35.7351	72.0491	35.279	71.8737	34.7878	71.7684	34.3317	71.5754	33.8931	71.3649	33.4545	71.1369	33.0159	70.9263	32.5774	70.6983	32.1388	70.4702	31.7177	70.2071	31.3844
Eliza_20141016_SA50736	25.8356	37.6893	25.0632	37.6736	21.6426	36.3495	21.2012	35.7662	21.1382	35.1357	26.7656	36.05	26.3557	35.3879	23.6287	32.9604	23.077	32.8659	22.5884	32.9762	27.2069	38.2095	26.8129	38.3199	26.3873	38.3514	25.9774	38.3356	25.5676	38.2883	25.1577	38.2253	24.7637	38.0676	24.3696	37.9415	23.9913	37.7839	23.5972	37.6105	23.2347	37.4214	22.8721	37.2322	22.5096	37.0115	22.1785	36.7751	21.8633
Eliza_20160711_SA54695	28.6113	17.6448	28.2464	18.1375	25.5276	20.1447	25.0531	20.1082	24.7794	19.9257	27.8449	16.2946	27.2245	16.3493	23.9766	17.5719	23.7758	18.0098	23.7941	18.32	29.6879	17.1522	29.5784	17.4989	29.3594	17.8091	29.1222	18.0645	28.8485	18.32	28.5748	18.5572	28.2828	18.7944	27.9909	19.0134	27.6807	19.2141	27.3705	19.4148	27.0603	19.5973	26.7501	19.798	26.4399	19.9805	26.0932	20.1082	25.7283
Eliza_20141015_SA50725	6.23238	8.63786	6.93528	8.38794	10.6685	9.02836	10.9652	9.372	11.0746	9.79374	5.67006	10.2623	6.26362	10.9496	9.38762	12.6366	9.8406	12.5585	10.1842	12.3086	4.90468	8.34108	5.24832	8.10678	5.65444	7.98182	6.06056	7.91934	6.4823	7.90372	6.90404	7.93496	7.31016	7.98182	7.7319	8.0443	8.13802	8.09116	8.55976	8.16926	8.96588	8.26298	9.372	8.34108	9.77812	8.46604	10.153	8.62224	10.4654
Eliza_20141016_SA50758	63.8646	15.0002	63.5561	15.682	60.2606	17.7113	59.7898	17.5977	59.4164	17.4028	63.2152	13.3931	62.5009	13.1658	58.7995	14.1398	58.5073	14.5132	58.4099	14.9515	65.1957	14.3346	65.0659	14.7405	64.8386	15.1139	64.5789	15.4548	64.2704	15.747	63.9457	16.0392	63.6048	16.2827	63.2477	16.51	62.8743	16.721	62.5009	16.9321	62.1113	17.1269	61.7217	17.3054	61.3321	17.4678	60.9262	17.6301	60.5041
Eliza_20161103_SA55446	70.5451	18.3549	69.9916	18.8906	66.0278	19.5869	65.5636	19.3191	65.1172	18.9799	70.5451	16.5516	69.8666	16.0695	65.9385	15.3553	65.4921	15.6588	65.1529	16.1588	71.6521	18.3728	71.3843	18.6763	71.045	18.9084	70.6701	19.1048	70.2951	19.2655	69.9023	19.3727	69.5095	19.5155	69.0988	19.5691	68.6882	19.6226	68.2954	19.7119	67.8847	19.7655	67.474	19.8012	67.0634	19.8548	66.6527	19.8191	66.2778
Eliza_20170911_SA56423	39.688	30.3952	39.1072	30.8352	35.0592	31.3632	34.3904	31.0112	34.056	30.6592	39.8816	28.512	39.1952	28.072	35.3408	26.9632	34.672	27.2976	34.32	27.6144	41.2368	30.3424	40.92	30.6768	40.5504	30.9232	40.1456	31.0992	39.7056	31.2224	39.2656	31.3104	38.8256	31.3984	38.3856	31.4864	37.928	31.5216	37.488	31.5568	37.0304	31.5744	36.5904	31.592	36.1328	31.592	35.6928	31.5392	35.2704
Eliza_20141016_SA50822	51.8084	25.3379	51.2906	25.888	47.2941	27.2309	46.7764	27.0853	46.3072	26.8103	51.4362	23.5095	50.7728	23.2345	46.744	23.2668	46.3881	23.5581	46.0806	23.8817	53.216	24.9657	52.9733	25.3541	52.6497	25.6777	52.2938	25.9527	51.9054	26.1954	51.5009	26.4058	51.0964	26.6161	50.6919	26.8264	50.2713	26.9882	49.8344	27.1177	49.3975	27.2471	48.9607	27.3442	48.5076	27.3927	48.0384	27.3766	47.6016
Eliza_20161103_SA55451	29.3051	39.6606	28.6111	39.6428	25.2661	38.7709	24.9102	38.3795	24.8746	37.9881	30.0168	38.1126	29.572	37.5788	26.5116	35.675	26.0667	35.7106	25.6753	35.9419	30.5862	40.0343	30.2303	40.1944	29.8389	40.2478	29.4474	40.2656	29.056	40.2478	28.6645	40.2122	28.2909	40.1232	27.9172	40.0165	27.5436	39.8919	27.1699	39.7851	26.7963	39.6606	26.4226	39.5183	26.0667	39.3759	25.7287	39.1802	25.444
Eliza_20160301_SA54141	35.4972	42.4966	34.7558	43.0138	30.8941	43.8068	30.5493	43.6172	30.2907	43.3069	35.4454	40.514	34.6524	39.9106	30.67	39.6692	30.3252	39.9796	30.0493	40.3244	36.7557	42.2725	36.4454	42.5656	36.0833	42.7897	35.704	43.0138	35.342	43.2207	34.911	43.2896	34.5145	43.4793	34.118	43.6	33.687	43.6517	33.2732	43.7724	32.8422	43.8413	32.4284	43.8758	31.9974	43.9103	31.5664	43.9103	31.1354
Eliza_20170208_SA55766	59.5465	15.6917	59.2262	16.2076	56.0239	17.8266	55.5435	17.7198	55.0987	17.5597	59.1195	14.1261	58.4612	14.0905	54.8852	14.5175	54.5828	14.8555	54.4405	15.1401	60.8986	15.2647	60.7741	15.6383	60.525	15.9585	60.2403	16.2432	59.9201	16.4745	59.5643	16.6702	59.2262	16.8659	58.8526	17.0438	58.4968	17.2217	58.141	17.4174	57.7852	17.5775	57.4116	17.702	57.0202	17.8088	56.611	17.8444	56.2196
Eliza_20141016_SA50829	43.6074	41.8334	42.9946	42.285	39.5595	43.43	39.0435	43.2687	38.6564	42.9946	43.2849	40.1885	42.672	39.8014	39.0435	39.7047	38.5758	39.9627	38.2371	40.3336	44.7847	41.5915	44.6073	41.9463	44.3331	42.2366	44.0106	42.4785	43.6558	42.6559	43.3171	42.8494	42.9301	42.9946	42.5592	43.1075	42.1721	43.2365	41.8012	43.3494	41.398	43.43	41.011	43.4945	40.6078	43.5429	40.2207	43.5429	39.8337
Eliza_20150210_SA51619	45.6754	33.0414	44.986	33.593	40.7631	33.9894	40.1599	33.6619	39.7979	33.1793	45.8133	31.2144	45.0204	30.6111	41.0389	29.6114	40.4529	29.7838	40.0737	30.0768	47.1232	33.0586	46.813	33.4034	46.4165	33.6447	46.0029	33.8343	45.5547	34.0066	45.1066	34.1273	44.6585	34.2135	44.2103	34.2996	43.745	34.3513	43.2796	34.3858	42.8142	34.3858	42.3489	34.3686	41.9007	34.3169	41.4353	34.2479	41.0044
Eliza_20141016_SA50738	52.562	32.7749	51.919	33.0642	47.4665	32.9356	46.9361	32.5659	46.6628	31.939	53.0281	30.7656	52.4655	30.2191	48.4792	28.5474	47.9327	28.6921	47.3219	29.0296	54.1372	32.8874	53.7675	33.1767	53.3335	33.3696	52.8674	33.5143	52.4012	33.5786	51.919	33.6107	51.4529	33.6429	50.9707	33.6429	50.5045	33.6268	50.0223	33.5947	49.5561	33.5464	49.09	33.4661	48.6238	33.3696	48.1577	33.2571	47.7076
Eliza_20151119_SA53729	54.0493	9.88821	53.6948	10.5599	51.0642	12.6308	50.6724	12.5748	50.3366	12.4629	53.303	8.43296	52.5941	8.47028	49.4037	9.75761	49.2358	10.1308	49.0866	10.5412	55.1501	9.1979	55.1128	9.57104	54.8889	9.88821	54.665	10.1867	54.4225	10.4666	54.1426	10.7464	53.8628	10.989	53.5829	11.2502	53.2844	11.4927	52.9859	11.7353	52.6687	11.9405	52.3515	12.1457	52.0157	12.3323	51.6799	12.5002	51.3068
Eliza_20170911_SA56430	68.4945	22.9539	67.7428	23.2161	63.3897	23.828	62.7254	23.4608	62.3583	23.0063	68.7742	20.856	68.1099	20.2791	63.9841	18.7757	63.3023	19.0204	62.7254	19.3526	70.1378	23.0238	69.7881	23.3385	69.3511	23.5657	68.8966	23.7231	68.442	23.8629	67.97	23.9503	67.498	24.0377	67.026	24.0902	66.554	24.1252	66.0645	24.1426	65.5925	24.1426	65.103	24.1252	64.631	24.1077	64.1589	24.0552	63.7044
Eliza_20160823_SA54876	56.9753	39.281	56.029	39.2453	52.1902	37.1384	51.8866	36.4956	51.8688	35.8886	58.1894	37.7276	57.9395	36.8349	54.922	33.5138	54.4042	33.3888	53.7793	33.6031	58.1359	40.1559	57.6716	40.1559	57.1896	40.1202	56.7253	40.0309	56.279	39.8881	55.8326	39.7274	55.4041	39.5488	54.9934	39.3167	54.6006	39.0489	54.1899	38.8168	53.7971	38.5668	53.3865	38.3168	52.9936	38.049	52.6365	37.7633	52.3687
Eliza_20170911_SA56442	41.5372	21.0833	41.0827	21.6602	37.5863	22.9539	37.2017	22.779	36.887	22.5693	41.2226	19.3875	40.3834	19.0204	36.9045	19.1952	36.5549	19.5099	36.38	19.947	42.726	20.7686	42.5512	21.1183	42.2715	21.4154	41.9568	21.6602	41.6072	21.87	41.2575	22.0623	40.8904	22.2371	40.5058	22.342	40.1387	22.4993	39.7541	22.6217	39.3869	22.7441	39.0023	22.8665	38.6003	22.9539	38.2157	23.0238	37.8136
Eliza_20151119_SA53710	71.5605	28.6057	70.8754	29.1796	66.9132	30.0313	66.4133	29.7906	65.9875	29.4759	71.4309	26.5875	70.6162	26.1802	66.6355	25.7173	66.1356	26.0691	65.6912	26.4024	73.0232	28.402	72.7825	28.7908	72.4307	29.0685	72.0604	29.3092	71.6716	29.5314	71.2272	29.661	70.8014	29.7536	70.357	29.8647	69.9126	29.9758	69.4683	30.0313	69.0239	30.1054	68.5796	30.1609	68.1352	30.1794	67.6908	30.1794	67.2465
Eliza_20141015_SA50661	56.8833	27.3715	56.4459	28.0902	53.6181	30.7617	53.0401	30.8867	52.6339	30.7617	55.7741	25.778	54.9617	25.8561	51.3997	27.4184	50.9935	27.9808	50.9935	28.5432	58.0707	26.4497	57.977	26.8716	57.8207	27.2778	57.5708	27.6371	57.3208	27.9964	57.0396	28.3245	56.7271	28.637	56.4303	28.965	56.1178	29.2619	55.7897	29.5431	55.4616	29.8399	55.1023	30.0899	54.743	30.3399	54.368	30.5586	53.9462
Eliza_20161103_SA55452	44.2259	54.2248	43.5666	54.0234	40.5816	52.6865	40.3985	52.2287	40.3252	51.7892	45.1782	52.8696	44.8852	52.2104	42.5411	49.9212	41.9917	49.8297	41.5705	49.9029	45.3064	54.8841	44.9401	54.9939	44.5738	55.0123	44.1893	54.9573	43.8413	54.8657	43.4934	54.7192	43.1454	54.5544	42.8158	54.3896	42.4678	54.2248	42.1382	54.06	41.8086	53.8768	41.4789	53.6754	41.1676	53.474	40.9112	53.1993	40.7281
UpperBarton_20140630_SA18207	47.2087	18.6886	46.8626	19.3808	43.9145	21.9188	43.3889	22.0213	42.9275	21.8034	46.2986	17.2402	45.4526	17.1889	41.7226	18.7143	41.4278	19.1629	41.4534	19.6756	48.2213	17.8683	48.1316	18.2785	47.9393	18.6502	47.7342	19.0219	47.4651	19.3552	47.1702	19.65	46.8626	19.9448	46.5293	20.2012	46.2217	20.4832	45.9013	20.7652	45.5552	21.0087	45.2347	21.2907	44.9015	21.5342	44.5297	21.7393	44.1196
Eliza_20141013_SA50421	17.1767	17.6093	17.9137	17.6573	21.0222	19.6762	21.1504	20.173	21.0222	20.6056	15.9749	18.7309	16.0711	19.5801	18.1541	22.6725	18.5867	22.8488	19.1475	22.8007	16.4877	16.712	16.8722	16.7761	17.2407	16.8402	17.6093	16.9684	17.9618	17.1286	18.2822	17.3209	18.6187	17.5292	18.9392	17.7214	19.2436	17.9458	19.5801	18.1541	19.8845	18.3784	20.189	18.6187	20.4614	18.8751	20.7177	19.1795	20.9421
Eliza_20141013_SA50425	61.3794	29.9801	60.7343	30.8187	56.7187	33.4474	55.9607	33.27	55.4285	32.9636	60.6375	27.9965	59.7183	27.7384	54.8802	28.4964	54.477	29.1254	54.219	29.6737	62.8792	29.3673	62.7502	29.8833	62.476	30.3349	62.1373	30.7381	61.7019	31.0606	61.2826	31.3831	60.831	31.6573	60.3956	31.9476	59.9441	32.2379	59.5086	32.5282	59.0409	32.7701	58.541	32.9797	58.0572	33.1894	57.5411	33.3184	57.0251
Eliza_20141013_SA50447	11.2171	8.16364	11.9923	7.92632	15.5995	7.65736	16.1216	7.89468	16.4538	8.27438	11.0747	10.0147	11.8183	10.3944	15.2356	11.4069	15.7894	11.1854	16.1532	10.869	9.88813	8.2902	10.1729	7.98961	10.5368	7.76811	10.9165	7.59408	11.312	7.48333	11.7392	7.43587	12.1505	7.40423	12.5619	7.34094	12.9732	7.29348	13.4004	7.26184	13.8117	7.26184	14.2389	7.27766	14.6502	7.32512	15.0616	7.40423	15.4255
Eliza_20141013_SA50456	37.3315	10.0423	37.8675	10.531	39.2233	13.5894	39.2233	14.0624	38.9868	14.3934	35.7077	10.4364	35.5816	11.1301	35.9757	14.4565	36.291	14.6772	36.6852	14.8033	36.8113	8.95452	37.1266	9.12794	37.3946	9.39594	37.6468	9.66395	37.8833	9.94772	38.0725	10.2788	38.2459	10.5941	38.4351	10.9251	38.5927	11.2562	38.7346	11.603	38.8923	11.9341	39.0026	12.2809	39.113	12.6435	39.2076	13.0061	39.2076
Eliza_20141014_SA50468	18.5344	33.6294	18.3433	33.0402	18.3911	28.6455	18.6936	28.1837	19.1713	27.7538	20.684	34.123	21.0661	33.8205	23.0406	29.6805	22.8177	29.1869	22.3877	28.741	18.4866	34.9032	18.2159	34.537	18.0408	34.1389	17.9293	33.709	17.8019	33.2791	17.7541	32.8332	17.7223	32.3874	17.7223	31.9415	17.7382	31.4957	17.7382	31.0498	17.786	30.604	17.8338	30.1582	17.8975	29.7282	18.0248	29.2983	18.2637
Eliza_20141014_SA50472	17.2464	7.27087	17.9783	7.54134	20.7307	10.6597	20.7466	11.2325	20.5875	11.7893	15.735	8.2732	15.6554	9.05279	17.2305	12.7916	17.6124	13.1258	18.1374	13.1894	16.5305	6.17308	16.9601	6.26854	17.3737	6.44355	17.7556	6.65038	18.1374	6.87312	18.4715	7.17541	18.7897	7.46179	19.1079	7.76408	19.4102	8.08228	19.6966	8.4323	19.9671	8.78232	20.2216	9.13234	20.4603	9.51418	20.6671	9.89602	20.6353
Eliza_20141014_SA50541	46.0124	7.3884	45.7295	8.12724	42.6798	11.3341	42.1139	11.507	41.5951	11.3027	44.7548	5.61204	44.016	5.69064	40.0546	7.48272	39.7873	7.86	39.8502	8.37876	46.9399	6.4452	46.9399	6.90108	46.7827	7.34124	46.5941	7.76568	46.3426	8.15868	46.0753	8.53596	45.7766	8.89752	45.478	9.24336	45.1478	9.57348	44.8177	9.88788	44.4719	10.2023	44.1103	10.501	43.733	10.7682	43.34	11.004	42.9156
Eliza_20141014_SA50546	51.9589	6.67029	51.9273	7.25374	50.9023	10.7072	50.5239	10.9437	50.0508	11.0225	50.4608	5.80299	49.9247	6.1026	47.5908	8.83064	47.6224	9.31948	47.8274	9.7137	52.4162	5.47184	52.5896	5.81876	52.6054	6.19722	52.6054	6.59144	52.5738	6.98567	52.495	7.36412	52.3846	7.74258	52.2585	8.12103	52.1323	8.49949	52.0062	8.86218	51.88	9.24063	51.7381	9.60332	51.5646	9.95024	51.3596	10.2814	51.06
Eliza_20141014_SA50549	38.0952	4.74603	38.492	5.5873	39.0317	9.60317	38.7301	10.2698	38.2857	10.5873	36.0317	4.63492	35.6031	5.47619	34.5873	9.14285	34.9523	9.87301	35.4127	10.2698	37.9365	3.12698	38.2698	3.44444	38.5396	3.80952	38.7777	4.20634	38.9206	4.65079	39.0158	5.09523	39.0952	5.55555	39.1904	5.99999	39.2539	6.46031	39.3333	6.92063	39.3809	7.38094	39.3968	7.84126	39.3968	8.30158	39.3333	8.74602	39.1428
Eliza_20141015_SA50621	12.6622	3.41628	13.3987	3.30658	17.0657	3.93342	17.4418	4.27818	17.7396	4.71697	12.0823	5.0774	12.4898	5.57888	15.812	7.33403	16.3449	7.33403	16.815	7.20866	11.3771	3.10286	11.7532	2.93048	12.145	2.80511	12.5525	2.77377	12.9599	2.7581	13.3674	2.77377	13.7748	2.82078	14.1823	2.85212	14.5897	2.91481	14.9815	3.00883	15.3733	3.14987	15.765	3.29091	16.1411	3.43195	16.5172	3.58866	16.8777
Eliza_20151118_SA53652	50.6189	34.0852	49.744	34.0673	46.1373	32.2818	45.8338	31.6926	45.8338	31.1213	51.6724	32.5675	51.3688	31.8176	48.5477	28.9965	47.8871	28.943	47.405	29.0501	51.8688	34.8351	51.4224	34.9065	50.976	34.9065	50.5296	34.8351	50.1011	34.7101	49.6905	34.5494	49.2798	34.3709	48.8691	34.2102	48.4763	33.9781	48.0835	33.7638	47.7086	33.5317	47.3158	33.3174	46.9229	33.1032	46.5837	32.7996	46.298
UpperBarton_20141210_SA51403	58.0251	8.44648	57.5235	9.01282	54.1093	10.6471	53.3973	10.6471	52.8795	10.4206	57.4749	6.7313	56.6982	6.58567	52.9442	7.08728	52.4588	7.55653	52.2484	8.04196	59.4005	7.78306	59.2548	8.18759	59.0121	8.54357	58.6723	8.80246	58.3163	9.04518	57.9442	9.27171	57.572	9.48207	57.1998	9.69242	56.8115	9.88659	56.407	10.016	55.9863	10.1617	55.5979	10.3235	55.2096	10.5015	54.7889	10.5986	54.352
UpperBarton_20150213_SA51869	36.7867	30.5324	36.065	30.8245	31.5118	30.2403	30.9791	29.8108	30.7214	29.3297	37.4739	28.2816	36.9928	27.7661	32.8004	25.773	32.1475	25.7558	31.6149	25.9448	38.5392	30.7042	38.144	31.0307	37.6458	31.151	37.1475	31.2712	36.6492	31.3228	36.1337	31.3228	35.6183	31.3228	35.1028	31.2884	34.6045	31.2369	34.1063	31.1338	33.5908	31.0651	33.0925	30.962	32.6114	30.773	32.1475	30.584	31.7008
Eliza_20150818_SA53201	46.1369	25.327	45.4818	25.9994	41.5681	27.9132	41.0336	27.7753	40.706	27.3959	45.5507	23.2926	44.7404	23.0857	40.3957	23.4305	39.9302	23.896	39.8612	24.4305	47.6714	24.896	47.4128	25.3098	47.0852	25.6546	46.7059	25.9477	46.3093	26.2063	45.8955	26.4649	45.4473	26.6546	45.0507	26.9132	44.6197	27.1373	44.1887	27.3442	43.7404	27.5166	43.2922	27.689	42.8266	27.8442	42.3611	27.9304	41.8784
Eliza_20160708_SA54660	43.2325	12.5532	42.7696	13.3308	39.3629	15.1453	38.8445	15.0712	38.4186	14.9231	42.6771	10.9053	41.7698	10.7017	38.1409	11.2571	37.7706	11.5534	37.5299	11.9607	44.3249	12.2199	44.1027	12.5717	43.862	12.8864	43.5843	13.2012	43.2696	13.4419	42.9363	13.6826	42.603	13.9048	42.2512	14.1084	41.8809	14.3121	41.5291	14.4972	41.1588	14.6639	40.7885	14.8305	40.3997	14.9786	40.0109	15.0712	39.6036
Eliza_20160829_SA55097	20.1814	34.106	19.3653	34.14	16.4239	32.7118	16.2199	32.2018	16.0839	31.6407	21.0995	32.9839	20.9125	32.2528	18.6172	29.8385	18.1751	29.6685	17.6991	29.6855	21.0655	34.8881	20.7084	34.9051	20.3514	34.8881	19.9774	34.8541	19.6373	34.7691	19.3143	34.6161	18.9912	34.4461	18.6682	34.276	18.3622	34.106	18.0391	33.936	17.7161	33.783	17.4271	33.5619	17.121	33.3579	16.849	33.1369	16.594
Parthenia_20170223_SA56125	38.3011	34.1585	37.944	34.7478	35.1763	36.6405	34.7835	36.6405	34.4085	36.5334	37.5869	33.0157	36.8905	33.105	33.9978	34.0157	33.7836	34.3907	33.7121	34.7835	39.2118	33.5871	39.1046	33.9264	38.9082	34.2478	38.6761	34.5156	38.4083	34.7656	38.1226	34.9978	37.8369	35.2299	37.5512	35.4442	37.2476	35.6406	36.9441	35.8548	36.6405	36.0513	36.3191	36.2477	36.0156	36.4262	35.6763	36.5691	35.3192
Eliza_20170913_SA56464	44.6097	55.5275	43.7435	55.6358	39.7373	54.2824	39.4666	53.8132	39.3764	53.362	45.5662	53.5786	45.2413	52.7665	41.7945	50.4205	41.199	50.4747	40.8201	50.7995	45.9632	56.1772	45.512	56.2674	45.0609	56.3035	44.6097	56.2855	44.1586	56.2313	43.7074	56.1411	43.2743	55.9787	42.8593	55.7982	42.4442	55.5997	42.0111	55.4915	41.578	55.329	41.1629	55.1486	40.7479	54.9501	40.3328	54.7516	39.9719
Eliza_20141015_SA50611	29.7245	36.2312	29.1849	36.1519	26.7727	34.1998	26.6457	33.7238	26.741	33.3111	30.8037	35.2314	30.7878	34.6601	28.9786	32.0891	28.5819	31.8987	28.1693	31.9304	30.518	36.9454	30.1847	36.9454	29.8515	36.8978	29.5341	36.7708	29.2484	36.5962	28.9786	36.3899	28.7088	36.1995	28.439	35.9932	28.1693	35.7869	27.8995	35.5964	27.6614	35.3742	27.4234	35.1203	27.2012	34.8823	26.979	34.6283	26.8362
Eliza_20141016_SA50784	41.498	23.5704	40.7242	23.4414	37.9351	21.9098	37.7738	21.4745	37.8061	21.0392	42.4492	22.4418	42.2074	21.7325	40.1115	19.1852	39.6279	19.0884	39.1765	19.1529	42.3525	24.1991	41.9978	24.2314	41.6431	24.2152	41.3046	24.1346	40.966	24.0057	40.6436	23.8444	40.3372	23.6832	40.0309	23.4898	39.7407	23.2963	39.4344	23.1189	39.1281	22.9255	38.8379	22.732	38.5477	22.5224	38.2575	22.3128	38.0318
Eliza_20160524_SA54439	36.9256	45.6161	36.1984	45.6889	33.4894	44.2889	33.253	43.9071	33.3076	43.5799	37.6892	44.4889	37.4165	43.8708	35.253	41.7981	34.8166	41.7254	34.3985	41.7981	37.8892	46.2706	37.5619	46.3434	37.2165	46.3252	36.8711	46.307	36.5438	46.2161	36.2347	46.0888	35.9257	45.9616	35.5984	45.8343	35.2893	45.6889	34.9984	45.5252	34.7075	45.3434	34.4166	45.1798	34.1257	44.998	33.8712	44.7798	33.653
Eliza_20160711_SA54694	57.0602	38.4411	56.3569	38.4596	53.3215	37.2381	53.0995	36.8864	52.9699	36.5163	57.8745	37.0715	57.4673	36.4793	54.8947	34.4804	54.5246	34.4619	54.1544	34.4989	58.0226	39.0149	57.6709	39.0889	57.3193	39.1074	56.9676	39.0704	56.616	38.9964	56.2828	38.8668	55.9497	38.7372	55.598	38.6262	55.2649	38.4966	54.9503	38.3486	54.6171	38.2005	54.3025	38.0154	53.9878	37.8489	53.6917	37.6453	53.4696
Eliza_20160829_SA55052	56.3162	24.4388	55.9127	25.123	52.9829	26.4037	52.4566	26.3335	52.018	26.1581	55.8776	22.9125	55.0706	22.7546	51.9829	23.123	51.5794	23.4563	51.3513	23.8774	57.4917	24.0528	57.3689	24.3862	57.1408	24.6669	56.8601	24.93	56.5794	25.1406	56.2636	25.3335	55.9303	25.4914	55.5969	25.6493	55.2636	25.8072	54.9303	25.9476	54.5969	26.0879	54.246	26.2107	53.8952	26.316	53.5443	26.3862	53.1759
Eliza_20160708_SA54654	33.0759	33.4955	32.6913	34.0375	29.8767	35.5409	29.5096	35.471	29.1949	35.2787	32.6564	32.0095	31.9921	31.8347	28.8803	32.2893	28.618	32.6214	28.4782	32.9711	34.1074	33.041	33.95	33.3557	33.7228	33.6179	33.478	33.8626	33.1983	34.0899	32.9011	34.2822	32.6039	34.457	32.2893	34.6144	31.9921	34.7892	31.6774	34.9465	31.3627	35.1213	31.0655	35.2787	30.7334	35.4185	30.4012	35.5234	30.0516
Eliza_20160826_SA54992	41.6771	30.1698	40.8763	30.1176	38.0735	28.7248	37.7775	28.2896	37.6905	27.8718	42.6869	28.7771	42.3561	28.1155	40.0581	25.8872	39.6055	25.7653	39.1877	25.8175	42.6869	30.7791	42.3387	30.7791	41.9731	30.7269	41.6249	30.6572	41.2767	30.5702	40.946	30.4832	40.5978	30.3613	40.2844	30.222	39.9711	30.0479	39.6577	29.8913	39.3443	29.7172	39.0484	29.5083	38.7698	29.2993	38.4565	29.1253	38.2128
Eliza_20171114_SA56790	44.9966	35.1106	44.5112	35.5636	41.5664	35.8711	41.2105	35.6607	40.9678	35.4504	45.0289	33.7838	44.4626	33.4279	41.5826	33.0072	41.2266	33.2661	40.9192	33.4764	46.1777	35.0135	45.9512	35.2562	45.66	35.4342	45.3687	35.596	45.0451	35.7093	44.7215	35.7902	44.3979	35.8549	44.0581	35.9196	43.7345	35.9681	43.3948	36.0005	43.055	36.0329	42.7314	36.0329	42.3916	36.0329	42.0518	36.0005	41.7282
OldMill_20160811_SA11990	41.2514	32.3442	41.0371	32.7548	39.4128	34.4327	39.1629	34.4505	38.913	34.3791	40.5374	31.416	40.109	31.5409	38.0384	32.7191	37.8956	32.9689	37.8777	33.1831	41.8047	31.8266	41.7869	32.0765	41.6976	32.3085	41.5905	32.5406	41.4477	32.7548	41.2871	32.9689	41.1086	33.1474	40.9301	33.3259	40.7516	33.5044	40.5909	33.6829	40.4124	33.8793	40.1982	34.0042	39.984	34.1649	39.7876	34.3077	39.5378
UpperBarton_20140317_SA16979	45.5889	16.4307	45.1718	17.0374	42.6566	18.2634	42.189	18.1749	41.8351	18.0106	45.1212	15.0783	44.4766	14.9646	41.7213	15.4954	41.418	15.8367	41.2284	16.2032	46.4989	16.0768	46.3978	16.3801	46.1576	16.5824	45.9554	16.8351	45.7153	17.0374	45.4372	17.2017	45.1465	17.3281	44.8685	17.4797	44.5778	17.6314	44.2871	17.7704	44.009	17.9095	43.7057	18.0359	43.415	18.1622	43.099	18.2128	42.783
UpperBarton_20140317_SA16980	23.3796	16.2702	23.0141	16.6946	21.1748	17.909	20.7976	17.9562	20.4203	17.8501	22.7665	15.0912	22.1652	15.0912	20.1255	15.8811	19.8662	16.1287	19.7482	16.5767	23.9809	15.5982	23.9927	15.8575	23.8747	16.1051	23.7451	16.3291	23.5564	16.5178	23.3678	16.6946	23.1438	16.8243	22.9316	16.9894	22.7193	17.1545	22.5189	17.3195	22.3067	17.4728	22.0827	17.626	21.8469	17.7322	21.6111	17.8265	21.3517
UpperBarton_20140317_SA16982	37.7578	18.7956	37.0527	18.9494	34.5141	18.6674	34.1808	18.3725	34.1808	18.052	38.0912	17.6161	37.6809	17.1289	35.2065	16.1288	34.8603	16.2442	34.5782	16.5134	38.5912	18.9623	38.322	19.0648	38.0399	19.1033	37.7578	19.1546	37.4758	19.2187	37.1937	19.1802	36.8988	19.1289	36.6168	19.1289	36.3347	19.0776	36.0527	19.0392	35.7578	18.9879	35.4757	18.9751	35.1936	18.9366	34.9116	18.8725	34.6552
UpperBarton_20140317_SA16983	33.891	26.5997	33.2159	26.5491	30.8699	25.4183	30.6842	25.047	30.6167	24.7094	34.6168	25.4689	34.4311	24.8951	32.3214	23.1397	31.9838	23.106	31.5956	23.1229	34.7012	27.0386	34.4142	27.1398	34.1273	27.1398	33.8235	27.1398	33.5366	27.0723	33.2497	26.9542	32.9965	26.8023	32.7264	26.6672	32.4564	26.5322	32.1863	26.4141	31.9163	26.279	31.6631	26.1103	31.41	25.9752	31.1737	25.7896	30.988
UpperBarton_20140317_SA16984	38.0833	23.0369	37.4603	23.4575	34.3918	23.7222	34.0336	23.5042	33.7999	23.1615	38.13	21.7129	37.5226	21.1989	34.5164	20.5759	34.1582	20.7005	33.8622	21.0432	39.2048	23.0213	39.0179	23.3173	38.6908	23.4886	38.3637	23.6288	38.0366	23.7378	37.6783	23.8001	37.3357	23.8313	36.9774	23.8936	36.6348	23.9403	36.2765	24.0026	35.9183	24.0182	35.5756	24.0182	35.2173	24.0182	34.8591	23.9559	34.532
UpperBarton_20140317_SA16985	37.3018	18.8293	36.7529	19.1862	34.2688	20.4076	33.9532	20.3252	33.6375	20.1743	36.9176	17.5942	36.2588	17.3609	33.5415	17.8686	33.2807	18.102	33.2533	18.4176	38.1115	18.3764	37.9743	18.6509	37.7547	18.8568	37.5351	19.0901	37.2881	19.2685	37.0274	19.4332	36.7529	19.5704	36.4784	19.7077	36.1902	19.8037	35.9157	19.941	35.6275	20.0508	35.3393	20.1743	35.0648	20.3115	34.7629	20.3801	34.461
UpperBarton_20140317_SA16986	26.329	19.786	26.0935	20.2964	24.1568	22.4294	23.8296	22.4687	23.4109	22.4163	25.4654	18.6214	24.8372	18.7522	22.4817	20.1394	22.364	20.4796	22.364	20.8067	26.8525	18.9616	26.8394	19.2626	26.6954	19.5374	26.5646	19.8122	26.4337	20.1001	26.2636	20.3618	26.0542	20.5843	25.871	20.8329	25.6747	21.0685	25.4784	21.304	25.2952	21.5526	25.0859	21.7882	24.8634	21.9976	24.6279	22.1939	24.353
UpperBarton_20140317_SA16987	38.4547	25.4807	37.7538	25.6053	35.1216	24.8733	34.8724	24.5929	34.7167	24.2814	38.9998	24.1724	38.6572	23.6117	36.1028	22.3501	35.7446	22.3813	35.3864	22.4747	39.3736	25.652	39.1088	25.8078	38.7973	25.8856	38.5014	25.9168	38.1899	25.9168	37.8784	25.8856	37.5825	25.7766	37.2865	25.6988	36.9906	25.6209	36.6791	25.543	36.3832	25.4651	36.0873	25.3873	35.7758	25.325	35.511	25.1692	35.2774
UpperBarton_20140317_SA16988	40.583	20.3126	39.9905	20.7217	37.3809	21.3001	36.9718	21.0603	36.6756	20.8346	40.4983	19.0431	39.92	18.6763	37.2539	18.5212	36.9295	18.8033	36.6051	19.1418	41.514	20.1575	41.3588	20.4114	41.0908	20.5665	40.8228	20.7076	40.5406	20.8346	40.2585	20.9615	39.9623	21.0038	39.6661	21.0744	39.3557	21.1167	39.0454	21.159	38.7492	21.2154	38.4389	21.2436	38.1426	21.3283	37.8464	21.3142	37.5361
UpperBarton_20140317_SA16989	30.7784	16.3585	30.1089	16.5284	27.2909	16.1087	27.0211	15.8189	26.9211	15.5391	31.1882	15.1694	30.9283	14.6597	28.2402	13.4106	27.8305	13.5205	27.5807	13.7104	31.9176	16.5184	31.6478	16.7083	31.3181	16.7782	30.9883	16.8282	30.6485	16.8482	30.3188	16.8282	29.979	16.7882	29.6392	16.7583	29.3195	16.6783	28.9797	16.6184	28.6599	16.5284	28.3302	16.4585	27.9904	16.4285	27.6706	16.3286	27.3808
UpperBarton_20140317_SA16992	24.7146	11.7335	24.2189	11.9896	21.9631	12.6837	21.6491	12.5515	21.3433	12.3945	24.4915	10.5519	23.8718	10.3535	21.4921	10.4527	21.2276	10.6675	21.0789	10.8741	25.5079	11.3947	25.3839	11.6426	25.1774	11.8244	24.9625	11.9979	24.7312	12.1466	24.4833	12.2623	24.2189	12.3284	23.9627	12.4276	23.69	12.5019	23.4339	12.5928	23.1695	12.6672	22.8968	12.692	22.6241	12.7498	22.3514	12.7581	22.0787
UpperBarton_20140317_SA16993	23.5534	16.9494	22.9173	16.8372	20.4853	15.4809	20.2888	15.2096	20.2608	14.8916	24.3017	15.9392	24.0678	15.378	22.0848	13.5727	21.7106	13.4978	21.3365	13.3762	24.4514	17.4359	24.152	17.52	23.8433	17.4452	23.544	17.361	23.2447	17.2675	22.9734	17.1085	22.6928	16.9588	22.4122	16.8185	22.1503	16.6408	21.879	16.4911	21.6077	16.3321	21.3271	16.1918	21.0652	16.014	20.8314	15.7989	20.6256
UpperBarton_20140317_SA17011	47.5263	19.5262	46.8914	19.6817	44.2611	19.293	43.9631	19.0209	43.8594	18.6451	47.8891	18.4119	47.5133	17.9066	44.9478	16.8571	44.585	16.8959	44.2611	17.0644	48.4333	19.6299	48.213	19.8501	47.9279	19.9279	47.6299	19.9927	47.3319	20.0445	47.021	20.0445	46.7229	19.9797	46.4249	19.9538	46.1269	19.9149	45.816	19.889	45.5309	19.7983	45.2329	19.7206	44.9478	19.6428	44.6628	19.5132	44.4296
UpperBarton_20140317_SA17012	22.7448	29.656	22.3823	30.1939	20.3125	31.7141	19.9149	31.7024	19.5875	31.5036	22.1952	28.4515	21.5403	28.3813	19.0495	29.3286	18.8156	29.5624	18.7221	29.8548	23.3763	29.1882	23.2944	29.4572	23.1424	29.7028	23.0021	29.9483	22.8384	30.1822	22.6279	30.3693	22.394	30.533	22.1835	30.7201	21.9496	30.8955	21.7275	31.071	21.4936	31.2347	21.2597	31.3867	21.0024	31.527	20.7452	31.6206	20.4645
UpperBarton_20140317_SA17014	25.1998	15.409	24.8576	15.8837	22.7052	17.1089	22.374	17.0979	22.0981	17.0316	24.703	14.2501	24.1291	14.0955	21.7007	14.9786	21.4689	15.2214	21.3475	15.5415	25.8289	14.8461	25.7737	15.1221	25.6413	15.3759	25.4647	15.5967	25.277	15.8064	25.0563	15.983	24.8355	16.1596	24.6147	16.3252	24.3719	16.4797	24.1291	16.6122	23.8752	16.7446	23.6213	16.8771	23.3674	16.9985	23.1025	17.0868	22.8155
UpperBarton_20140317_SA17018	37.0589	18.066	36.6559	18.5227	34.8292	19.5033	34.6143	19.463	34.2919	19.3958	36.6022	17.0049	36.0112	16.9378	34.0098	17.5959	33.7949	17.8108	33.7546	18.0526	37.5962	17.6094	37.5693	17.8511	37.435	18.0526	37.2872	18.2541	37.126	18.4287	36.9514	18.5899	36.7231	18.7108	36.5216	18.8317	36.3067	18.966	36.1052	19.0869	35.8903	19.2078	35.6754	19.3152	35.4605	19.4361	35.2187	19.4898	34.9769
UpperBarton_20140317_SA17026	22.2057	13.6506	21.6178	13.8551	19.1893	13.7785	18.857	13.5484	18.678	13.2075	22.4017	12.4492	21.9501	12.0146	19.7006	11.171	19.3171	11.2392	18.9592	11.4352	23.0323	13.6166	22.8533	13.8211	22.5892	13.9148	22.3335	14.0085	22.0609	14.0682	21.7882	14.0767	21.507	14.0767	21.2343	14.0937	20.9617	14.0596	20.6805	14.0426	20.4078	14.017	20.1351	13.983	19.8625	13.9744	19.5898	13.9063	19.3341
UpperBarton_20140317_SA17027	27.1028	16.7411	26.4986	16.9888	23.5267	16.6916	23.1899	16.4241	22.9918	16.0477	27.4297	15.4534	26.974	14.9581	24.2796	13.7099	23.8636	13.7495	23.4871	13.9972	27.8656	17.0779	27.5882	17.2265	27.291	17.3157	26.9839	17.3553	26.667	17.3652	26.3698	17.3058	26.0627	17.286	25.7556	17.2364	25.4386	17.2067	25.1315	17.1473	24.8244	17.0978	24.5273	17.0284	24.2202	16.9789	23.9329	16.8402	23.6456
UpperBarton_20140317_SA17029	32.4487	29.3191	32.0593	29.8132	29.1843	30.8914	28.7651	30.8464	28.3608	30.6218	32.0593	27.9415	31.4753	27.7618	28.4506	28.0613	28.1062	28.3608	27.8816	28.7052	33.377	28.8399	33.2872	29.1694	33.0626	29.4089	32.7931	29.6485	32.5235	29.8582	32.239	30.0229	31.9246	30.1576	31.6101	30.2924	31.2957	30.4272	30.9812	30.5769	30.6668	30.6967	30.3373	30.8015	30.0079	30.8914	29.6785	30.9363	29.3341
UpperBarton_20140630_SA18193	44.4153	23.3364	43.8944	23.7238	40.782	24.0578	40.4347	23.8707	40.1942	23.657	44.4153	21.8938	43.881	21.5732	40.7686	21.2125	40.4213	21.3461	40.1274	21.64	45.4172	23.1227	45.1901	23.3765	44.9096	23.5769	44.6157	23.7372	44.3085	23.8707	43.9745	23.9643	43.6406	24.0444	43.32	24.1245	42.9727	24.1646	42.6387	24.178	42.2914	24.2047	41.9575	24.1913	41.6235	24.2581	41.2896	24.2448	40.969
UpperBarton_20140630_SA18194	21.9608	16.0088	21.3813	16.1295	18.9788	15.7432	18.7131	15.538	18.5803	15.1999	22.2747	14.8136	21.8521	14.3789	19.6186	13.4493	19.2202	13.5459	18.9305	13.7753	22.7455	16.0933	22.5403	16.2623	22.2868	16.3589	22.0212	16.3951	21.7555	16.4193	21.4899	16.371	21.2243	16.3348	20.9587	16.2985	20.6931	16.2865	20.4275	16.2382	20.1619	16.1657	19.9084	16.1175	19.6428	16.0812	19.3892	15.9847	19.1599
UpperBarton_20140630_SA18196	26.2183	14.7923	25.7298	15.3126	23.2875	16.7674	22.8839	16.8205	22.5972	16.6506	25.6555	13.4224	24.8909	13.4224	22.1619	14.2719	21.907	14.5799	21.684	14.9622	27.1209	14.1657	27.0147	14.4843	26.8448	14.7604	26.6325	15.0259	26.4201	15.2701	26.1334	15.44	25.8466	15.6099	25.5706	15.8011	25.2732	15.9391	24.9865	16.109	24.6998	16.2683	24.4131	16.4382	24.1264	16.6081	23.8078	16.7143	23.4786
UpperBarton_20150409_SA53103	30.7103	19.4117	30.0415	19.6933	26.9089	19.5525	26.5217	19.2357	26.2577	18.8837	31.0094	17.8982	30.3583	17.4406	27.5952	16.3495	27.1377	16.4199	26.7681	16.6663	31.8014	19.3765	31.5726	19.6405	31.2558	19.8165	30.9214	19.9221	30.5695	19.9397	30.2175	19.9573	29.8655	19.9749	29.4959	19.9573	29.1439	19.9749	28.792	19.9749	28.44	19.9573	28.088	19.9221	27.736	19.9045	27.384	19.8165	27.0849
Parthenia_20160229_SA53992	30.9569	32.499	30.2572	32.6132	27.3443	31.7279	27.1301	31.2996	26.9873	30.9569	31.5994	31.0854	31.2567	30.4857	28.6437	28.815	28.1867	28.8721	27.8583	29.0292	31.8564	32.9702	31.528	33.0559	31.1996	33.0702	30.8569	33.0844	30.5285	33.0416	30.2001	32.9702	29.8859	32.8845	29.5718	32.7703	29.2434	32.6989	28.915	32.6132	28.6008	32.4847	28.2867	32.3705	27.9868	32.2277	27.7013	32.0564	27.4442
Parthenia_20160811_DSC4843	30.2089	21.4854	29.9117	22.0098	28.3733	23.8979	28.0236	23.9329	27.6565	23.8979	29.3523	20.4889	28.7579	20.6462	26.7125	21.9574	26.6251	22.2721	26.6076	22.6742	30.8557	20.7686	30.8732	21.0483	30.8033	21.328	30.6809	21.5903	30.5411	21.835	30.3662	22.0623	30.1914	22.2895	30.0166	22.5168	29.8243	22.7441	29.632	22.9539	29.4572	23.1637	29.2649	23.3734	29.0551	23.5832	28.8103	23.7406	28.5481
Parthenia_20161110_SA55532	56.8604	30.9827	56.5248	31.4949	54.4758	32.9964	54.0872	32.9787	53.8752	32.8904	56.1892	29.7462	55.6063	29.8522	53.257	30.8237	53.0803	31.1416	53.0627	31.4419	57.567	30.4174	57.514	30.7	57.3373	30.9297	57.1784	31.1593	57.0017	31.3713	56.7898	31.5656	56.5601	31.7599	56.3482	31.9365	56.1009	32.0955	55.8712	32.2721	55.6416	32.4488	55.412	32.6077	55.1647	32.7491	54.9174	32.8727	54.6348
Parthenia_20161117_SA55544	39.3422	38.7239	39.0419	38.1939	38.0702	35.5617	38.2292	35.2437	38.4059	34.9787	40.7731	38.5119	40.9321	37.9466	40.9498	35.1553	40.7201	34.8727	40.4198	34.7314	39.5895	39.6778	39.3245	39.5012	39.1655	39.2362	38.9889	38.9712	38.8299	38.6885	38.7062	38.4059	38.5825	38.1056	38.4942	37.8052	38.4059	37.5049	38.2999	37.2046	38.1939	36.9043	38.1056	36.604	38.0172	36.3036	37.9996	35.9856	38.0349
Parthenia_20161117_SA55545	57.9565	19.4264	57.5623	20.0357	55.3759	21.6844	55.0175	21.7023	54.6949	21.6127	57.3293	18.2794	56.6841	18.2973	54.0677	19.3547	53.9064	19.6235	53.8168	19.964	58.6913	19.0142	58.6196	19.3009	58.4762	19.5877	58.3149	19.8385	58.1178	20.0715	57.8669	20.2507	57.616	20.4299	57.401	20.6271	57.1501	20.8063	56.9171	21.0034	56.6483	21.1468	56.3795	21.3081	56.1286	21.4694	55.8418	21.5769	55.5372
Parthenia_20161117_SA55546	9.58921	27.9819	10.1071	28.3212	12.1606	30.1069	12.2142	30.464	12.2499	30.839	8.53565	28.9105	8.69636	29.4641	10.1785	31.8212	10.4821	31.9462	10.8749	32.0176	9.12493	27.2676	9.41064	27.3391	9.67849	27.4641	9.92849	27.6069	10.1606	27.7855	10.3749	27.9819	10.5713	28.1962	10.7856	28.3926	10.9999	28.5891	11.2142	28.7855	11.4285	28.9819	11.6428	29.1783	11.8392	29.3926	11.982	29.6426	12.107
Parthenia_20161117_SA55550	30.1783	10.5356	30.5712	11.0892	31.589	14.1606	31.4283	14.5713	31.1248	14.8213	28.6069	10.8035	28.4105	11.4642	28.3748	14.6963	28.6605	15.0356	29.0176	15.232	30.0176	9.55349	30.2855	9.76778	30.5355	10.0178	30.714	10.3213	30.8748	10.6249	31.0355	10.9463	31.1248	11.2678	31.1962	11.607	31.3212	11.9463	31.4283	12.2678	31.5176	12.607	31.6426	12.9285	31.714	13.2678	31.7319	13.6249	31.6605
Parthenia_20161117_SA55562	65.6959	12.1606	65.3745	12.6606	62.8209	14.1963	62.4995	14.1785	62.1959	14.0535	65.3209	10.9463	64.7495	10.9106	61.9459	11.4106	61.6959	11.732	61.5174	12.107	66.7138	11.7499	66.5709	12.0535	66.3388	12.2856	66.0888	12.482	65.8388	12.6963	65.5709	12.8928	65.303	13.0535	65.0173	13.232	64.7316	13.3927	64.4459	13.5535	64.1602	13.7142	63.8745	13.8749	63.5888	14.0356	63.2852	14.1249	62.9638
Parthenia_20161117_SA55587	46.9182	18.1243	46.2646	18.2656	42.9436	17.877	42.661	17.5413	42.5373	17.1704	47.3599	16.5874	46.9359	16.1105	43.8975	14.6796	43.4912	14.8033	43.1203	14.9976	48.1195	18.2833	47.8192	18.5129	47.4659	18.6542	47.1126	18.7249	46.7239	18.7602	46.353	18.7602	45.982	18.7249	45.611	18.6896	45.2401	18.6012	44.8691	18.5482	44.4981	18.4599	44.1272	18.3893	43.7562	18.3186	43.4206	18.1773	43.1026
Parthenia_20161117_SA55598	10.9961	32.0986	11.69	32.2765	14.4479	34.0736	14.6081	34.4472	14.5725	34.8209	9.92849	33.2373	10.0708	33.9313	12.2594	36.4401	12.5797	36.5112	12.9533	36.4934	10.2844	31.4402	10.6402	31.4224	10.9783	31.4936	11.2986	31.6182	11.6188	31.7783	11.9213	31.9384	12.2238	32.1164	12.5441	32.2765	12.8288	32.4722	13.1312	32.6502	13.3981	32.8993	13.665	33.095	13.9497	33.3263	14.181	33.5754	14.3234
Parthenia_20161117_SA55600	7.27839	34.696	7.47272	34.1484	9.34531	31.5161	9.7163	31.3925	9.99896	31.4101	8.44435	35.7737	9.02733	35.6323	11.5889	33.6007	11.6596	33.2297	11.6596	32.8941	6.55409	35.6323	6.53642	35.279	6.58942	34.9257	6.71308	34.59	6.88974	34.2897	7.0664	33.9717	7.27839	33.6891	7.47272	33.3887	7.68471	33.1061	7.8967	32.8234	8.10869	32.5231	8.32069	32.2405	8.58568	32.0108	8.86833	31.7811	9.16865
Parthenia_20161117_SA55615	35.7442	33.2097	35.588	32.5674	36.3518	29.512	36.5949	29.2342	36.9421	29.1474	37.1678	33.852	37.6538	33.4006	39.303	30.623	39.2162	30.2758	39.0426	29.946	35.3623	34.4249	35.2061	34.095	35.154	33.7478	35.154	33.3833	35.1714	33.0361	35.2061	32.6715	35.2408	32.3243	35.3102	31.9598	35.4491	31.6473	35.5012	31.3001	35.5706	30.9355	35.7095	30.6057	35.831	30.2758	36.0046	29.9634	36.213
Parthenia_20161117_SA55617	15.0153	18.1689	15.4632	18.4914	17.2192	20.6595	17.2371	21.0178	17.1654	21.3762	13.8685	18.8497	13.8506	19.3873	14.8361	22.0929	15.1586	22.29	15.3916	22.3617	14.5673	17.3446	14.854	17.4521	15.1049	17.5955	15.3736	17.7567	15.5887	17.9538	15.7858	18.1868	15.9829	18.4197	16.162	18.6526	16.3591	18.8856	16.5383	19.1185	16.7175	19.3694	16.8788	19.6202	17.04	19.8711	17.1654	20.1398	17.1654
Parthenia_20161117_SA55620	14.4641	19.2143	14.98	19.0364	17.2929	18.7695	17.5775	18.9652	17.7198	19.1965	14.3573	20.3707	14.8555	20.5842	17.0972	21.1713	17.4352	21.0645	17.6665	20.8155	13.4856	19.1965	13.6457	18.983	13.8948	18.8585	14.1616	18.7517	14.4285	18.6806	14.6954	18.6272	14.9622	18.6094	15.2469	18.6094	15.5138	18.5738	15.7806	18.5382	16.0653	18.5204	16.3321	18.5204	16.6168	18.5382	16.8837	18.556	17.1327
Parthenia_20161117_SA55622	56.2049	24.6063	55.5466	24.464	52.9846	22.7026	52.8244	22.2044	52.8778	21.8664	57.3614	23.5032	57.2013	22.8983	55.262	20.3185	54.8883	20.1939	54.5147	20.1405	57.1657	25.407	56.7921	25.407	56.4362	25.3358	56.0982	25.2468	55.7601	25.1045	55.4399	24.9266	55.1196	24.7487	54.8172	24.5352	54.5147	24.3217	54.1944	24.1437	53.9276	23.9124	53.6251	23.6989	53.3404	23.4676	53.1269	23.183	53.0557
Parthenia_20161117_SA55628	41.4835	18.969	41.5899	19.554	41.5544	22.4614	41.3062	22.7273	41.0403	22.8159	40.0298	18.7917	39.7284	19.3058	38.8952	22.0182	38.9839	22.3727	39.1434	22.6918	41.5899	17.923	41.7849	18.1889	41.8735	18.4903	41.9267	18.8094	41.9799	19.1285	41.9976	19.4653	41.9976	19.7844	41.9976	20.1036	42.0154	20.4404	42.0331	20.7595	42.0154	21.0786	41.9799	21.3977	41.909	21.7168	41.8204	22.0359	41.6608
Parthenia_20170223_SA56084	52.4533	23.4264	51.9056	23.6384	48.7786	23.0201	48.5489	22.6491	48.4606	22.3311	52.9657	21.9071	52.5947	21.4124	49.8209	20.0167	49.3793	20.052	49.0436	20.211	53.6017	23.6914	53.3013	23.8504	52.948	23.9035	52.5947	23.9565	52.259	23.9741	51.9056	23.9741	51.5523	23.9565	51.199	23.9388	50.8633	23.8504	50.5276	23.7798	50.1743	23.7091	49.8386	23.6031	49.5206	23.4794	49.2026	23.3381	48.9023
Parthenia_20170223_SA56086	38.0151	14.6443	38.4744	15.0506	40.0112	17.7533	39.9582	18.1596	39.7992	18.3893	36.5312	15.1919	36.6372	15.7748	37.3085	18.7602	37.6264	18.9722	37.9268	19.1665	37.7854	13.5314	38.0681	13.708	38.2801	13.9553	38.5097	14.2027	38.7217	14.4676	38.916	14.7503	39.075	15.0506	39.2163	15.3509	39.3753	15.6335	39.5343	15.9338	39.6579	16.2518	39.7992	16.5521	39.9406	16.8701	40.0289	17.188	40.0466
Parthenia_20170223_SA56090	20.9641	40.6782	21.4998	40.339	24.3569	39.839	24.7319	39.9997	24.9284	40.214	20.982	42.0889	21.5355	42.3389	24.4105	42.7854	24.8391	42.5889	25.0177	42.3568	19.7498	40.6961	19.9463	40.4282	20.232	40.2318	20.5356	40.089	20.857	39.964	21.1784	39.8925	21.5177	39.8747	21.857	39.8211	22.1963	39.7854	22.5177	39.714	22.857	39.6783	23.1962	39.6604	23.5355	39.6068	23.8748	39.6425	24.1962
Parthenia_20170223_SA56091	24.6789	24.8568	24.1095	24.9636	21.6541	24.4476	21.4762	24.1629	21.3338	23.9138	25.1237	23.6647	24.8212	23.2555	22.5437	22.0099	22.2413	22.0811	21.9921	22.1523	25.6397	25.1059	25.3906	25.2483	25.1059	25.3016	24.8034	25.3194	24.5188	25.3194	24.2163	25.3016	23.9316	25.2661	23.6469	25.2127	23.3622	25.1593	23.0775	25.0881	22.7928	25.017	22.5081	24.928	22.2413	24.8568	21.9744	24.7323	21.7608
Parthenia_20170223_SA56093	28.0624	30.5623	28.4497	30.175	30.844	28.8018	31.1785	28.8194	31.4953	28.925	28.5553	31.7946	29.0835	31.777	31.8827	31.0024	32.0235	30.7735	32.1995	30.5095	27.1293	30.9496	27.2173	30.6503	27.411	30.4214	27.6398	30.2102	27.8687	29.9989	28.1152	29.8053	28.3793	29.6644	28.6609	29.5236	28.9426	29.4003	29.2067	29.2243	29.4708	29.0835	29.7524	28.9426	30.0341	28.837	30.3334	28.8018	30.6503
Parthenia_20170223_SA56124	52.9382	32.0587	52.4277	32.358	49.6109	32.6397	49.3116	32.3932	49.1356	32.1291	52.9911	30.7031	52.5333	30.3862	49.7869	29.8053	49.4172	29.9637	49.206	30.1574	54.0121	32.0411	53.8009	32.2876	53.5192	32.446	53.2199	32.5516	52.9206	32.6397	52.6037	32.7277	52.2869	32.7805	51.97	32.8157	51.6531	32.8685	51.3362	32.8861	51.0193	32.8861	50.7024	32.8861	50.3679	32.8861	50.051	32.8509	49.7517
Parthenia_20170518_SA56153	50.0919	27.4138	49.5636	27.5081	47.2241	27.0553	46.96	26.8289	46.809	26.5081	50.5447	26.2251	50.1674	25.8855	47.9976	24.7912	47.658	24.8478	47.3939	24.961	50.9032	27.7911	50.6579	27.8666	50.3938	27.9232	50.1296	27.9609	49.8655	27.942	49.6013	27.9043	49.3561	27.8477	49.0919	27.8288	48.8278	27.7722	48.5637	27.7156	48.3184	27.6402	48.0731	27.5647	47.8278	27.4704	47.5826	27.3572	47.375
Parthenia_20170518_SA56158	40.7907	13.1834	40.513	13.5907	37.9948	15.5349	37.7356	15.5349	37.4394	15.4794	40.0871	11.9799	39.6057	12.0539	36.8098	13.2204	36.6987	13.5352	36.6246	13.887	41.698	12.4983	41.5869	12.8131	41.3833	13.0908	41.1611	13.35	40.9204	13.5907	40.6797	13.85	40.4389	14.0722	40.1797	14.2944	39.902	14.498	39.6428	14.7017	39.3835	14.9424	39.1058	15.1091	38.8095	15.2942	38.5133	15.4609	38.18
Parthenia_20170518_SA56163	43.9247	34.0176	43.1655	34.1657	40.4248	33.4065	40.2026	33.1102	40.073	32.8324	44.4247	32.7769	43.9247	32.2584	41.5174	30.8695	41.1285	30.9065	40.8507	30.9991	44.8691	34.2398	44.5728	34.3879	44.258	34.425	43.9432	34.4435	43.6099	34.425	43.2951	34.3694	42.9803	34.3139	42.6655	34.2398	42.3507	34.1472	42.0359	34.0916	41.7396	33.9805	41.4248	33.8879	41.1285	33.7953	40.8322	33.6657	40.5729
Parthenia_20170518_SA56164	39.3831	42.3818	38.7833	42.3272	36.2571	40.8733	36.039	40.419	36.039	40.0737	40.2736	41.2913	40.001	40.7461	37.9473	38.6016	37.493	38.5289	37.2385	38.5471	40.3463	43.036	40.0191	43.1087	39.692	43.1087	39.3649	43.036	39.0559	42.927	38.747	42.7816	38.4562	42.5999	38.1654	42.4363	37.8928	42.2546	37.5838	42.1092	37.3112	41.9274	37.0386	41.7275	36.7842	41.5094	36.5479	41.2732	36.3662
Parthenia_20170518_SA56165	26.9806	48.816	26.4715	49.4887	24.5989	51.325	24.1262	51.4159	23.8171	51.3977	26.1079	47.5797	25.2898	47.6342	22.799	48.9251	22.6172	49.3251	22.599	49.7432	27.7806	48.3069	27.7078	48.616	27.5806	48.8887	27.3988	49.1614	27.1988	49.3978	26.9442	49.5796	26.7079	49.7796	26.4897	49.9796	26.2534	50.2159	26.0534	50.4341	25.817	50.6341	25.5807	50.8523	25.3261	51.0341	25.0352	51.1613	24.7443
Parthenia_20170817_SA56179	42.4824	19.67	42.2046	20.2256	39.6699	22.2047	39.2706	22.2221	38.9234	22.2047	41.5275	18.1249	40.8678	18.1943	37.9685	19.4096	37.7949	19.7047	37.656	19.9478	43.4199	18.8714	43.4025	19.236	43.2636	19.5658	43.09	19.8783	42.8643	20.1561	42.6039	20.4165	42.3088	20.6249	42.0483	20.8853	41.7706	21.0936	41.4928	21.3193	41.1977	21.545	40.9025	21.7533	40.6074	21.9443	40.2775	22.0832	39.9129
Parthenia_20170817_SA56184	28.6006	10.0871	28.0761	10.6815	24.8419	12.2374	24.4398	12.185	24.0902	12.0101	28.0761	8.3564	27.3768	8.30395	23.9154	8.95078	23.6007	9.30042	23.5308	9.68503	29.7893	9.4228	29.7019	9.82488	29.4397	10.157	29.16	10.4542	28.8278	10.699	28.4782	10.9262	28.1111	11.1186	27.7439	11.3109	27.3943	11.5032	27.0097	11.6605	26.6251	11.8178	26.2405	11.9927	25.8559	12.115	25.4363	12.1675	25.0342
Parthenia_20170817_SA56197	46.3163	22.3639	45.7748	22.6528	43.2839	23.3026	42.9229	23.2123	42.598	22.9415	46.2261	20.938	45.6304	20.7034	43.0853	20.4506	42.7604	20.6853	42.4897	21.0102	47.2188	22.2376	47.0383	22.4542	46.8036	22.6528	46.551	22.7791	46.2983	22.9235	46.0275	23.0318	45.7387	23.086	45.468	23.1401	45.1791	23.2123	44.9084	23.2845	44.6196	23.3387	44.3308	23.3747	44.042	23.4108	43.7532	23.4289	43.4644
Parthenia_20170817_SA56199	43.008	10.8237	42.8109	11.433	40.8397	13.4938	40.5709	13.5117	40.2662	13.4221	42.0762	9.71264	41.4131	9.78432	39.1194	11.2538	38.9581	11.5405	38.9222	11.8989	43.7786	10.2323	43.7248	10.537	43.6173	10.8237	43.4739	11.1104	43.3126	11.3613	43.1334	11.6122	42.9363	11.863	42.7392	12.096	42.5242	12.311	42.327	12.544	42.112	12.759	41.879	12.992	41.6461	13.1891	41.3773	13.3504	41.0906
Parthenia_20170817_SA56201	42.5617	47.2109	41.9126	47.2109	39.0529	46.2635	38.8775	45.9302	38.7547	45.5969	43.3337	46.0004	42.9477	45.5267	40.4916	43.6144	40.1056	43.5968	39.7898	43.7547	43.5442	47.7548	43.2109	47.8425	42.8775	47.8425	42.5442	47.8425	42.2109	47.7723	41.8951	47.7021	41.5793	47.5618	41.2459	47.4916	40.9477	47.3688	40.6319	47.246	40.2986	47.1407	40.0003	47.0004	39.7021	46.8425	39.4389	46.6495	39.1933
Parthenia_20170817_SA56212	38.9528	34.6267	38.4032	34.8749	35.6018	35.4423	35.1586	35.2472	34.9458	35.0345	38.8996	33.0842	38.3854	32.765	35.4777	32.5346	35.1231	32.836	34.9104	33.1374	40.0875	34.4671	39.8393	34.6799	39.5556	34.8572	39.2719	34.999	38.9705	35.1231	38.6514	35.194	38.3145	35.2472	37.9954	35.2827	37.6763	35.3536	37.3571	35.4423	37.038	35.4777	36.7188	35.5309	36.382	35.5664	36.0628	35.5487	35.7437
Parthenia_20170817_SA56233	44.2213	23.1752	43.6054	23.5448	40.5963	23.9143	40.2267	23.7735	39.8748	23.5096	44.2213	21.4683	43.6406	21.0812	40.5787	20.7117	40.1564	20.9052	39.8924	21.0988	45.3827	22.9993	45.1363	23.2456	44.8548	23.4568	44.5556	23.6152	44.2213	23.7559	43.8869	23.8263	43.535	23.8967	43.2006	23.9671	42.8487	24.0199	42.5144	24.0727	42.1624	24.1079	41.8105	24.1079	41.4585	24.1079	41.1066	24.0903	40.7722
Parthenia_20170817_SA56242	43.9123	14.4043	43.4752	14.9463	41.2726	17.2188	40.7132	17.3761	40.3811	17.3237	42.8634	12.8311	42.1642	13.0233	39.1924	14.4043	38.8952	14.8589	38.7029	15.2609	44.9961	13.4254	44.9961	13.81	44.8562	14.1596	44.6814	14.4917	44.4542	14.8064	44.2094	15.1036	43.9298	15.3658	43.6501	15.628	43.3878	15.8902	43.1081	16.1524	42.811	16.4147	42.5138	16.6419	42.1817	16.8342	41.8495	17.009	41.4999
Parthenia_20170817_SA56244	24.6643	29.5237	24.1049	29.5936	21.4654	29.6461	21.1508	29.3664	20.9935	29.1392	24.874	27.968	24.4021	27.6883	21.9549	26.8842	21.5179	27.0241	21.0984	27.2688	25.7306	29.4888	25.5033	29.681	25.2236	29.8209	24.9265	29.9083	24.6468	29.9957	24.3322	30.0481	24.035	30.0656	23.7378	30.0831	23.4232	30.0656	23.126	30.0656	22.8114	30.0656	22.5142	30.0656	22.2171	30.0132	21.9199	29.9258	21.6577
Parthenia_20170817_SA56252	61.0189	21.2492	60.438	21.3725	57.1986	20.7211	56.8994	20.3866	56.6353	20.0873	61.5119	19.7704	61.1422	19.3303	57.9909	17.9043	57.5155	17.9923	57.1986	18.1332	62.3569	21.5309	62.0576	21.7598	61.6703	21.8302	61.3006	21.883	60.9133	21.9006	60.526	21.883	60.1563	21.8302	59.769	21.7598	59.3993	21.6718	59.0296	21.6013	58.6423	21.5133	58.2726	21.4077	57.9205	21.2844	57.5684	21.1084	57.3395
Parthenia_20170817_SA56266	43.7222	39.2365	43.1371	39.5379	39.8393	39.7684	39.5202	39.5202	39.3074	39.1478	43.8817	37.6408	43.3676	37.3039	40.2116	36.3642	39.8925	36.5415	39.5556	36.8607	44.8037	39.3251	44.5378	39.5556	44.2186	39.7152	43.8817	39.8393	43.5449	39.9102	43.1903	39.9634	42.8534	39.9989	42.4988	40.0343	42.1442	40.0698	41.7896	40.0875	41.435	40.0698	41.0804	40.0698	40.7258	40.0698	40.3889	40.0166	40.0521
Parthenia_20170817_SA56268	68.106	24.0809	67.4019	24.2569	64.3566	23.676	64.1453	23.412	64.0925	23.1127	68.5989	22.6375	68.194	22.2502	65.3599	20.8596	65.0079	20.9476	64.6206	21.0708	69.2502	24.3273	68.951	24.521	68.6165	24.6266	68.282	24.697	67.9124	24.697	67.5779	24.6618	67.2259	24.5914	66.8738	24.5562	66.5217	24.5034	66.1697	24.4506	65.8352	24.3626	65.4832	24.2569	65.1487	24.1513	64.8318	23.9929	64.5678
Parthenia_20170817_SA56271	38.0452	43.6942	37.3233	43.6401	34.5439	42.2143	34.3814	41.8714	34.3453	41.4924	39.0378	42.4489	38.731	41.7992	36.5292	39.5251	36.114	39.4529	35.6448	39.5432	39.0198	44.2176	38.6769	44.3078	38.334	44.2898	37.991	44.2176	37.6481	44.1274	37.3233	44.001	37.0164	43.8566	36.7096	43.6942	36.4028	43.5318	36.078	43.3693	35.7711	43.2069	35.4643	43.0264	35.1756	42.864	34.9048	42.6294	34.6883
Parthenia_20171109_SA56527	35.9126	33.3161	35.3336	33.6494	32.4564	34.2634	32.1055	34.1055	31.8073	33.8599	35.8424	31.7722	35.2459	31.4213	32.2634	31.1932	31.9476	31.4564	31.6845	31.7196	37.0003	33.088	36.7898	33.3687	36.5266	33.5792	36.2459	33.7547	35.9301	33.9126	35.6143	34.0003	35.2634	34.0529	34.9476	34.1406	34.6143	34.2108	34.281	34.3336	33.9476	34.3862	33.6143	34.4213	33.281	34.4389	32.9301	34.4213	32.6143
Parthenia_20171109_SA56529	50.837	18.8298	50.3777	19.3421	47.4455	20.4549	47.0039	20.2959	46.6683	20.084	50.4837	17.3107	49.9008	17.0458	46.7389	17.2754	46.421	17.611	46.3327	17.9643	51.9498	18.5119	51.7908	18.8298	51.5436	19.0771	51.2609	19.2891	50.9606	19.4834	50.6427	19.6424	50.3247	19.7837	50.0068	19.925	49.6712	20.0486	49.3532	20.19	48.9999	20.2959	48.6643	20.4019	48.3287	20.4902	47.9754	20.5079	47.6221
Parthenia_20171109_SA56536	65.7956	39.2936	65.1066	39.2936	61.8203	37.9509	61.7497	37.6152	61.8203	37.2971	66.573	37.8979	66.308	37.3325	63.6755	35.1593	63.1278	35.1947	62.8097	35.389	66.9794	39.8767	66.6084	39.9827	66.202	39.9827	65.8133	39.9473	65.4246	39.859	65.0536	39.7707	64.6649	39.647	64.2939	39.5233	63.9405	39.3643	63.5695	39.223	63.2161	39.0639	62.8627	38.8696	62.5271	38.6753	62.209	38.4456	61.944
Parthenia_20171109_SA56540	30.5705	12.3825	30.4126	12.9438	28.7815	15.294	28.3781	15.4869	28.0624	15.522	29.4304	11.3653	28.8867	11.5582	26.747	13.3647	26.6242	13.8558	26.6768	14.154	31.237	11.488	31.2545	11.8037	31.1668	12.1194	31.0791	12.4352	30.9563	12.7158	30.7809	12.9964	30.6056	13.277	30.4126	13.5226	30.2022	13.7681	30.0268	14.0312	29.8514	14.2943	29.6584	14.5574	29.4655	14.8205	29.2375	15.0485	28.9569
Parthenia_20171109_SA56541	39.6108	27.6801	39.2765	28.1728	36.7777	29.6861	36.373	29.6685	36.109	29.5454	39.0125	26.2899	38.3967	26.2899	35.6163	26.941	35.2996	27.2753	35.106	27.6625	40.6139	27.1874	40.5083	27.5041	40.3499	27.7857	40.1388	28.0496	39.8924	28.2784	39.6284	28.4895	39.3645	28.6831	39.0829	28.8767	38.8014	29.035	38.5022	29.211	38.2207	29.3694	37.9039	29.4926	37.5872	29.5982	37.2704	29.6861	36.9361
Parthenia_20171109_SA56544	63.5012	13.9256	63.0963	14.2953	60.2443	15.6156	59.857	15.5452	59.5577	15.3868	63.0611	12.3939	62.5154	12.2707	59.5225	12.7988	59.276	13.0629	59.1704	13.3446	64.6103	13.3974	64.4695	13.7319	64.223	13.9784	63.959	14.2072	63.6773	14.4185	63.378	14.6121	63.0787	14.7706	62.7618	14.9466	62.4273	15.0699	62.1104	15.2107	61.7936	15.3516	61.4591	15.4572	61.1246	15.5804	60.7725	15.6156	60.4204
Parthenia_20171109_SA56547	48.1865	26.7587	47.6464	26.7064	45.4688	25.5218	45.3469	25.243	45.2598	24.9295	48.953	25.6089	48.7265	25.1037	46.8102	23.5009	46.5663	23.4487	46.2528	23.4661	48.953	27.1942	48.6917	27.2639	48.413	27.2639	48.1342	27.229	47.8555	27.1593	47.6116	27.0548	47.3677	26.9154	47.1238	26.7761	46.8799	26.6541	46.636	26.5148	46.3921	26.3754	46.1482	26.236	45.9218	26.0792	45.7127	25.905	45.5559
Parthenia_20171109_SA56577	31.4353	34.3607	30.7438	34.5203	27.7475	33.9175	27.4106	33.4742	27.251	33.1906	31.9849	32.8892	31.5594	32.4282	28.8822	30.7793	28.3857	30.8857	27.9779	31.0452	32.6055	34.7153	32.2863	34.8572	31.9495	34.9458	31.5949	34.9636	31.2403	34.9458	30.8857	34.9104	30.5311	34.8572	30.1942	34.8394	29.8396	34.7685	29.485	34.7331	29.1481	34.6444	28.8113	34.5558	28.4744	34.4671	28.1552	34.3075	27.8716
Parthenia_20171109_SA56579	48.3032	39.3568	47.5175	39.3747	44.0889	38.4997	43.8211	38.0533	43.7675	37.6961	49.0889	37.7676	48.7139	37.089	45.6246	35.1069	45.0711	35.089	44.5889	35.2676	49.696	39.8925	49.3032	40.0354	48.8925	40.0711	48.4818	40.089	48.071	40.0533	47.6603	39.9997	47.2675	39.8925	46.8568	39.8033	46.4639	39.6961	46.0711	39.5533	45.6961	39.4104	45.3032	39.2318	44.9461	39.0533	44.5711	38.8568	44.2496
Parthenia_20171109_SA56581	67.2317	41.211	66.5569	40.9342	63.9791	39.3079	63.8926	38.8926	63.8061	38.5293	68.3043	40.0691	68.1659	39.3944	66.1071	36.9203	65.6573	36.903	65.294	36.903	68.0621	41.9376	67.7161	41.9376	67.3701	41.8511	67.0414	41.7473	66.73	41.5916	66.4358	41.4186	66.1244	41.2456	65.8303	41.0553	65.5708	40.8304	65.2767	40.64	64.9999	40.4497	64.723	40.2248	64.4808	39.9826	64.2386	39.7231	64.0656
Parthenia_20171109_SA56584	33.8696	34.6469	33.3925	34.9296	30.6186	35.23	30.2653	34.965	30.0356	34.7	34.0109	33.2865	33.4809	32.9862	30.813	32.2794	30.4243	32.4738	30.1769	32.6858	35.071	34.6646	34.859	34.8943	34.5763	35.0533	34.2759	35.177	33.9579	35.2653	33.6399	35.3007	33.3395	35.3713	33.0215	35.4067	32.6858	35.442	32.3678	35.4597	32.0498	35.4597	31.7317	35.442	31.4137	35.4243	31.0957	35.389	30.7777
Parthenia_20171109_SA56585	39.447	40.7944	38.7024	40.7412	36.2381	39.5002	36.0962	39.1811	36.0608	38.9152	40.3689	39.7661	40.0853	39.1279	37.9046	37.1423	37.5678	37.0536	37.2132	37.0359	40.298	41.4859	39.9789	41.539	39.6598	41.5213	39.3407	41.4504	39.0215	41.3618	38.7201	41.2199	38.4187	41.0958	38.1351	40.954	37.8337	40.8122	37.55	40.6703	37.2664	40.5285	36.9827	40.3512	36.699	40.1739	36.4686	39.9434	36.3267
Parthenia_20171109_SA56591	51.825	28.0002	51.2285	28.2458	48.1583	28.2108	47.7899	27.895	47.5969	27.5616	52.1408	26.4914	51.632	26.0704	48.7899	25.0353	48.3337	25.1756	47.9653	25.4739	53.1759	28.1406	52.8776	28.3511	52.5443	28.4915	52.1934	28.5792	51.8425	28.6318	51.4741	28.6494	51.1232	28.6494	50.7548	28.6494	50.3864	28.6494	50.0355	28.6494	49.6671	28.6494	49.3162	28.6143	48.9478	28.5792	48.6144	28.4388	48.2986
Eliza_20141013_SA50442	34.6759	42.525	34.0869	42.1906	32.1604	39.7229	32.1923	39.4045	32.2559	39.0383	35.9337	41.8722	35.9337	41.2354	34.5963	38.1467	34.2938	37.9716	33.9595	37.9716	35.1217	43.4643	34.7874	43.4006	34.5008	43.2255	34.2302	43.0345	33.9595	42.8275	33.7366	42.5728	33.5296	42.3021	33.3227	42.0314	33.1157	41.7608	32.9087	41.4901	32.7017	41.2195	32.5266	40.9329	32.3674	40.6304	32.2559	40.312	32.2082
Eliza_20141014_SA50467	58.3102	28.7175	57.9442	29.0039	55.3509	29.5608	55.0804	29.4335	54.8418	29.2903	58.1829	27.4925	57.7215	27.2857	55.0327	27.2857	54.81	27.4447	54.6986	27.6198	59.2011	28.5266	59.0261	28.7653	58.8034	28.9403	58.5647	29.0994	58.3102	29.2108	58.0397	29.3062	57.7533	29.3699	57.4828	29.4812	57.2124	29.5449	56.926	29.6085	56.6555	29.6721	56.3691	29.7199	56.0827	29.7517	55.7964	29.7199	55.5259
Eliza_20141014_SA50475	32.5978	22.3326	32.0022	22.3796	29.7298	21.7527	29.4634	21.408	29.432	21.0162	33.1776	21.2356	32.8015	20.7654	30.9209	19.2766	30.5604	19.3079	30.247	19.4176	33.397	22.6774	33.1463	22.7557	32.8799	22.7557	32.6134	22.7714	32.3627	22.7401	32.0963	22.6774	31.8455	22.599	31.5948	22.5363	31.344	22.458	31.0932	22.3953	30.8268	22.3169	30.5917	22.2229	30.341	22.1289	30.1059	22.0035	29.8865
Eliza_20141014_SA50512	38.7045	23.0113	38.4679	23.6738	36.1652	26.1973	35.6132	26.2919	35.1558	26.2604	37.6951	21.655	36.938	21.8442	34.0517	23.4687	33.8309	23.8946	33.7521	24.2889	39.5246	22.0808	39.5562	22.4593	39.4615	22.8379	39.3354	23.2006	39.1303	23.5161	38.9095	23.8315	38.6572	24.1312	38.4048	24.4151	38.1682	24.7147	37.9159	24.9986	37.6162	25.251	37.3323	25.5033	37.0169	25.7241	36.7172	25.9449	36.3702
Eliza_20141014_SA50519	35.1239	29.185	34.9647	28.6278	34.8055	26.2872	34.9966	25.9688	35.2832	25.8096	36.3499	29.2646	36.6365	28.7392	37.1619	26.5261	37.0823	26.1758	36.8594	25.8732	35.1717	29.9334	34.9966	29.7423	34.8851	29.5035	34.7896	29.2646	34.7259	29.0099	34.694	28.7392	34.694	28.4845	34.6622	28.2297	34.6463	27.959	34.6303	27.7043	34.6303	27.4336	34.6303	27.1789	34.6463	26.9082	34.694	26.6534	34.8055
Eliza_20141014_SA50521	23.4938	4.56084	24.1364	4.96834	25.5313	8.25967	25.453	8.55746	25.2335	8.8239	21.8325	5.07805	21.566	5.73632	22.0519	9.01197	22.4437	9.29409	22.8042	9.48217	23.1804	3.60479	23.5095	3.77719	23.8073	4.01229	24.0581	4.27873	24.2775	4.57652	24.4969	4.8743	24.7163	5.17209	24.8887	5.50122	25.0298	5.84603	25.1552	6.20651	25.2805	6.55131	25.4059	6.89612	25.5	7.2566	25.5627	7.61708	25.5627
Eliza_20141014_SA50529	27.1239	14.137	27.635	13.8814	30.6541	13.6737	31.0055	13.8654	31.2611	14.0731	26.9481	15.5906	27.4753	15.9421	30.4944	16.581	30.7979	16.4692	31.1014	16.2615	26.1015	14.121	26.3571	13.9134	26.6287	13.7376	26.9322	13.6258	27.2516	13.546	27.5711	13.498	27.9066	13.498	28.2261	13.4661	28.5455	13.4341	28.881	13.4182	29.2005	13.4182	29.52	13.4341	29.8394	13.498	30.1749	13.53	30.4784
Eliza_20141014_SA50532	52.2415	17.1147	51.8088	17.6275	49.2608	18.7813	48.8762	18.7492	48.4916	18.4929	51.7768	15.7846	51.1358	15.6083	48.3795	16.0571	48.075	16.2814	47.9147	16.666	53.0427	16.7141	52.9787	17.0186	52.7863	17.275	52.562	17.4993	52.3216	17.7076	52.0492	17.8679	51.7768	18.0441	51.5044	18.1884	51.2159	18.3326	50.9435	18.4768	50.639	18.573	50.3345	18.6691	50.014	18.7332	49.7096	18.7653	49.389
Eliza_20141014_SA50550	14.9197	4.46003	15.4593	4.14259	17.9195	3.52358	18.2369	3.65056	18.4591	3.92038	14.9832	5.63456	15.5546	5.88851	18.0782	6.14246	18.3956	5.93613	18.5702	5.68218	14.1102	4.53939	14.3007	4.33306	14.5229	4.17434	14.761	4.03149	15.0149	3.92038	15.2847	3.82515	15.5546	3.76166	15.8244	3.69818	16.0783	3.61882	16.3482	3.55533	16.618	3.49184	16.9037	3.47597	17.1735	3.44422	17.4592	3.42835	17.729
Eliza_20141015_SA50567	10.6903	11.841	11.2959	11.9168	13.6732	13.0827	13.8549	13.4007	13.9458	13.6884	10.0391	12.8404	10.2814	13.4007	12.2347	15.2329	12.5679	15.2783	12.8404	15.2177	9.81202	11.3565	10.0997	11.2656	10.4026	11.2505	10.7054	11.2959	11.0082	11.3565	11.2959	11.4776	11.5685	11.6139	11.841	11.735	12.1287	11.8562	12.4013	11.9773	12.6587	12.1287	12.9313	12.2802	13.1735	12.477	13.3855	12.6739	13.5975
Eliza_20141015_SA50571	52.3486	35.7223	51.8968	36.0988	49.4872	36.9874	49.0504	36.897	48.7643	36.7615	52.0323	34.4723	51.4901	34.2615	48.9149	34.4723	48.5685	34.6531	48.3275	34.9543	53.2973	35.4211	53.1618	35.6922	52.966	35.9181	52.7401	36.1139	52.4841	36.2795	52.198	36.385	51.9118	36.4904	51.6407	36.6109	51.3546	36.7313	51.0835	36.8368	50.7974	36.9271	50.4962	36.9874	50.195	37.0175	49.8938	37.0325	49.5926
Eliza_20141015_SA50581	49.1171	22.8551	48.8963	23.486	46.6565	25.5365	46.3411	25.568	46.0256	25.3945	48.2181	21.7194	47.5714	21.7194	44.9688	23.1232	44.89	23.5018	44.8426	23.9119	49.7796	22.1295	49.7954	22.4608	49.6376	22.7604	49.4957	23.0601	49.3537	23.3598	49.1487	23.628	48.9121	23.8645	48.6755	24.1011	48.4389	24.322	48.2023	24.5586	47.9657	24.7952	47.7133	25.016	47.461	25.221	47.177	25.3945	46.8616
Eliza_20141015_SA50584	36.7586	14.7159	36.6023	15.2783	35.3995	17.3092	35.1339	17.4185	34.7902	17.4185	35.8525	13.9817	35.2901	14.1067	33.5248	15.7626	33.4779	16.075	33.6029	16.4656	37.1804	13.9817	37.2272	14.2473	37.196	14.5128	37.1491	14.7628	37.071	15.0284	36.9617	15.2627	36.8211	15.497	36.7117	15.7314	36.5867	15.9657	36.4461	16.2	36.3055	16.4187	36.1649	16.6374	36.0087	16.8561	35.8212	17.0592	35.6025
Eliza_20141015_SA50585	21.2369	14.0744	20.7981	14.2781	18.6195	14.3565	18.3531	14.1997	18.165	13.949	21.425	12.8989	20.9861	12.5697	18.8076	12.1779	18.5255	12.2406	18.3061	12.4444	22.0833	14.0587	21.8952	14.2311	21.6758	14.3408	21.4407	14.4348	21.2056	14.4975	20.9548	14.5132	20.704	14.5132	20.4533	14.5445	20.2025	14.5445	19.9517	14.5602	19.701	14.5759	19.4502	14.5602	19.1994	14.5445	18.9487	14.4975	18.7136
Eliza_20141015_SA50589	15.5496	24.0581	15.7837	23.5429	17.6884	22.0598	18.0006	22.0285	18.3597	22.1847	16.2053	25.0729	16.7829	25.0729	18.953	24.0893	19.1247	23.8395	19.2028	23.4961	14.8938	24.5421	14.9407	24.2767	15.0968	24.0581	15.2061	23.8083	15.3466	23.5741	15.5496	23.4024	15.7681	23.2307	15.9711	23.0589	16.174	22.8716	16.3614	22.6842	16.5643	22.5125	16.7985	22.3876	17.0483	22.2627	17.2825	22.1534	17.5479
Eliza_20141015_SA50590	21.3875	21.3404	21.9214	21.2776	24.2611	21.9999	24.4653	22.2669	24.5752	22.6123	20.9007	22.4396	21.2305	22.8793	23.2718	24.1826	23.6487	24.1355	23.9628	23.9157	20.6337	21.0263	20.9007	20.9792	21.1676	20.9478	21.4346	20.9321	21.7015	20.9635	21.9528	21.0106	22.204	21.1205	22.471	21.1676	22.7222	21.2148	22.9892	21.2619	23.2561	21.3404	23.4917	21.4346	23.7429	21.5445	23.9628	21.6858	24.1512
Eliza_20141015_SA50591	56.1533	22.2853	56.1061	22.8825	55.3518	25.1299	55.0217	25.3342	54.786	25.4128	55.0217	21.7195	54.5188	22.191	53.1987	24.0612	53.2301	24.4069	53.3244	24.6741	56.4519	21.4838	56.5305	21.7352	56.5305	22.0024	56.5305	22.2696	56.499	22.5367	56.4362	22.7882	56.3576	23.0397	56.279	23.2911	56.2004	23.5426	56.1218	23.8097	56.0433	24.0612	55.949	24.2969	55.8389	24.5484	55.6975	24.7684	55.4932
Eliza_20141015_SA50613	30.2508	12.837	30.9248	12.9937	33.2289	15.0941	33.3229	15.4859	33.2916	15.9248	29.1066	13.7304	29.2007	14.4044	30.8621	17.022	31.1913	17.1787	31.6145	17.2727	29.5768	12.069	29.9217	12.069	30.2508	12.163	30.5643	12.2884	30.8778	12.4295	31.1599	12.6176	31.4264	12.837	31.6772	13.0408	31.9279	13.2916	32.1787	13.511	32.4138	13.7461	32.6489	14.0126	32.8997	14.2477	33.0878	14.5298	33.1505
Eliza_20141015_SA50641	58.2941	16.8306	57.7368	17.2446	54.4726	17.6268	53.9471	17.372	53.7083	17.0376	58.4056	15.2383	57.8164	14.8243	54.4089	14.2511	53.979	14.4581	53.6446	14.8084	59.5679	16.8784	59.2973	17.1331	58.9947	17.3401	58.6603	17.4835	58.31	17.6108	57.9597	17.7064	57.5935	17.7382	57.2113	17.7541	56.8451	17.7701	56.4948	17.8497	56.1127	17.8656	55.7464	17.8815	55.3802	17.8497	55.014	17.786	54.6637
Eliza_20141015_SA50643	8.87614	17.6415	9.38245	17.2143	12.3728	16.1068	12.8633	16.2492	13.1639	16.5182	9.12929	19.1763	9.68306	19.3978	12.8949	19.3345	13.243	19.0022	13.4487	18.6383	7.89518	17.8789	8.10086	17.6099	8.32237	17.3567	8.60717	17.1669	8.89196	16.9928	9.2084	16.8504	9.52484	16.7397	9.85711	16.6447	10.1894	16.5498	10.5058	16.4391	10.8222	16.3125	11.1387	16.2175	11.471	16.1384	11.819	16.1068	12.1513
Eliza_20160829_SA55048	43.6884	54.8489	43.1586	54.9195	41.0395	54.6193	40.8276	54.4074	40.704	54.1955	43.9179	53.807	43.6001	53.5068	41.6223	52.6415	41.3044	52.6591	41.0748	52.7651	44.483	54.9901	44.2711	55.1314	44.0415	55.202	43.7767	55.2197	43.5294	55.2374	43.2822	55.2374	43.035	55.2197	42.7701	55.202	42.5229	55.1844	42.2756	55.1314	42.0284	55.0961	41.7812	55.0254	41.5516	54.9548	41.3221	54.8489	41.1808
Eliza_20170208_SA55768	37.2649	18.9763	36.9298	19.5231	34.9193	21.4277	34.5666	21.4454	34.2315	21.3748	36.3831	17.7418	35.7834	17.7771	33.2086	19.0998	33.0851	19.4172	33.0146	19.717	37.9879	18.1827	37.9879	18.5002	37.8645	18.8	37.6881	19.0822	37.5294	19.3643	37.3354	19.6289	37.1238	19.8758	36.9121	20.105	36.6829	20.3343	36.4536	20.5636	36.1891	20.7752	35.9422	20.9868	35.6776	21.1808	35.3955	21.3219	35.078
Eliza_20170911_SA56420	43.2875	59.545	42.748	59.9946	39.9425	60.6241	39.6188	60.4982	39.331	60.1565	43.1976	57.9984	42.6401	57.6387	39.7806	57.4769	39.4749	57.6747	39.2771	58.0524	44.3306	59.3832	44.1327	59.6349	43.881	59.8328	43.5932	60.0126	43.3055	60.1565	42.9997	60.2644	42.676	60.3363	42.3703	60.4262	42.0466	60.4802	41.7229	60.5521	41.4172	60.642	41.0934	60.696	40.7697	60.714	40.446	60.732	40.1223
Eliza_20170210_SA55899	40.0453	26.0801	39.6361	26.4715	37.359	27.3788	37.0566	27.361	36.7719	27.2543	39.7073	24.817	39.1558	24.7637	36.7364	25.0127	36.4517	25.2796	36.2916	25.5109	40.917	25.8489	40.7747	26.0801	40.5612	26.2758	40.3477	26.4537	40.1165	26.5961	39.8674	26.7206	39.6183	26.8273	39.3515	26.9341	39.1024	27.0586	38.8534	27.1475	38.5865	27.2543	38.3197	27.3254	38.0528	27.3788	37.786	27.3966	37.5013
Eliza_20171120_SA57112	63.4072	10.9437	62.9177	11.2759	59.736	11.6955	59.5787	11.5556	59.3164	11.3458	63.4072	9.49273	62.8653	9.2305	59.8409	8.91582	59.5612	9.1256	59.3164	9.37035	64.4037	10.9787	64.1415	11.1885	63.8443	11.3458	63.5296	11.5032	63.2149	11.608	62.8828	11.7129	62.5506	11.7829	62.2184	11.8178	61.8863	11.8703	61.5541	11.9227	61.222	11.9402	60.8723	11.9402	60.5402	11.9402	60.208	11.8528	59.8758
Eliza_20160829_SA55111	38.9928	36.5796	38.3678	36.597	35.9199	35.6595	35.6942	35.3296	35.5727	34.9824	39.6525	35.3817	39.34	34.8435	37.1352	33.281	36.8053	33.2463	36.3713	33.2637	39.7046	36.9963	39.4268	37.0137	39.1317	37.031	38.8539	37.0137	38.5761	36.9789	38.2984	36.8921	38.0206	36.8227	37.7602	36.7185	37.4998	36.6143	37.222	36.5275	36.9616	36.4234	36.7185	36.2845	36.4581	36.163	36.2324	35.9894	36.0414
Eliza_20170215_SA56061	38.7376	29.0796	38.3506	29.6953	35.659	31.7887	35.2544	31.7712	34.9025	31.5952	37.8228	27.5667	37.1367	27.5491	34.0405	28.7277	33.7766	29.0268	33.6711	29.4138	39.5996	28.3759	39.494	28.7277	39.3357	29.062	39.1246	29.3786	38.8959	29.6601	38.632	29.9416	38.3682	30.1879	38.0691	30.4342	37.7876	30.6629	37.4886	30.8916	37.1719	31.0851	36.8552	31.2786	36.5386	31.4721	36.1867	31.5952	35.8349
Eliza_20171120_SA57100	50.5035	31.985	49.9634	32.1069	47.1238	31.3752	46.8799	31.0965	46.7754	30.6958	51.0435	30.6784	50.6777	30.1035	48.2736	28.5704	47.9252	28.5879	47.5942	28.7098	51.5313	32.3856	51.2352	32.525	50.9216	32.6121	50.608	32.6295	50.277	32.5947	49.9634	32.5424	49.6499	32.4727	49.3363	32.3856	49.0227	32.2985	48.6917	32.2463	48.3781	32.1592	48.082	32.0372	47.7858	31.9153	47.4896	31.7759	47.2806
Eliza_20170911_SA56388	72.1058	32.702	71.562	32.9652	68.6146	32.6669	68.4216	32.4564	68.2812	32.2634	72.4216	31.281	72.0006	30.895	69.1058	29.9125	68.8076	30.0353	68.597	30.2283	73.0883	32.9125	72.8251	33.088	72.5094	33.1932	72.1936	33.281	71.8778	33.3336	71.5444	33.3511	71.2286	33.3511	70.8953	33.3511	70.5795	33.2985	70.2637	33.2634	69.9304	33.2283	69.6146	33.1757	69.2988	33.1055	69.0006	32.9652	68.7198
Eliza_20171117_SA56851	33.3225	17.0045	33.1288	17.6206	30.9461	19.6802	30.4708	19.821	30.0131	19.733	32.3719	15.6843	31.7382	15.9659	29.133	17.2157	28.9041	17.691	28.8161	18.0783	34.1674	16.1772	34.2202	16.5116	34.1146	16.8461	33.9562	17.1629	33.7626	17.4446	33.5689	17.7086	33.3049	17.9551	33.0408	18.1839	32.7944	18.4127	32.5479	18.6592	32.2839	18.888	32.0199	19.0993	31.7382	19.2929	31.4566	19.4865	31.1397
Eliza_20141016_SA50791	40.9703	25.7763	40.5819	26.4236	37.8959	27.9446	37.5237	27.9284	37.2648	27.7504	40.404	24.3686	39.7082	24.4171	36.7794	25.0482	36.5691	25.3718	36.5043	25.6469	41.9412	25.1938	41.8602	25.5336	41.6984	25.8572	41.5043	26.1323	41.2454	26.3912	40.9703	26.5854	40.679	26.7957	40.3878	26.9899	40.0803	27.1517	39.7567	27.3135	39.4493	27.4753	39.1257	27.621	38.802	27.7666	38.4784	27.8799	38.1224
Eliza_20170215_SA56012	58.0276	43.7924	57.5543	44.108	54.6617	44.3534	54.3812	44.2132	54.2059	43.9677	58.1854	42.5477	57.7296	42.127	54.8194	41.5835	54.4513	41.7764	54.276	42.0919	59.1496	43.8626	58.9042	44.0554	58.6061	44.1606	58.2906	44.2307	57.975	44.3008	57.6595	44.3359	57.3614	44.3885	57.0459	44.4236	56.7303	44.4586	56.4148	44.4937	56.0992	44.5112	55.7836	44.5112	55.4681	44.5287	55.1525	44.5112	54.837
Eliza_20170208_SA55790	55.172	31.6926	54.5113	31.9605	51.4224	32.0319	51.0474	31.8176	50.851	31.5676	55.3326	30.1392	54.7434	29.7821	51.6902	29.0501	51.3331	29.1929	51.0832	29.3358	56.279	31.6212	56.029	31.8712	55.7255	32.0319	55.3862	32.1747	55.047	32.2461	54.6899	32.3175	54.3328	32.3711	53.9935	32.4068	53.6364	32.4068	53.2793	32.4247	52.9222	32.4425	52.5651	32.4247	52.208	32.3711	51.8688	32.2818	51.5474
Eliza_20160829_SA55066	45.499	19.6375	44.9645	20.1547	41.9991	20.9995	41.5163	20.8099	41.137	20.5685	45.3266	18.1548	44.6369	17.8444	41.5508	17.7927	41.2405	17.9306	40.9991	18.2065	46.6886	19.4306	46.4817	19.7065	46.2059	19.9478	45.9128	20.1375	45.6024	20.3099	45.2749	20.4478	44.9473	20.5685	44.6025	20.6375	44.2749	20.7582	43.9301	20.8616	43.5852	20.9306	43.2404	20.9995	42.8956	21.0685	42.5335	21.0685	42.1887
Eliza_20160711_SA54691	49.2638	24.2459	48.7674	24.54	46.4697	24.7789	46.1572	24.5767	45.8999	24.3378	49.3005	23.051	48.8042	22.7937	46.4697	22.3709	46.1204	22.5731	45.9182	22.7753	50.2012	24.2459	49.999	24.4297	49.7785	24.5767	49.5395	24.7054	49.2638	24.7789	49.0064	24.8341	48.7307	24.8525	48.4733	24.8892	48.1976	24.926	47.9219	24.9444	47.6645	24.9628	47.3888	24.9628	47.1131	24.9444	46.8557	24.9076	46.5984
Eliza_20160829_SA55068	21.7533	60.5058	21.1569	60.9619	17.9289	61.3654	17.5079	61.1374	17.2974	60.8742	21.7884	59.0848	21.2095	58.6462	18.0342	58.0673	17.6132	58.2954	17.4027	58.5936	22.841	60.5058	22.6305	60.804	22.3322	60.9795	22.0165	61.1374	21.6831	61.2602	21.3323	61.3479	20.9639	61.383	20.613	61.4005	20.2622	61.418	19.9113	61.4356	19.5429	61.4882	19.192	61.5058	18.8412	61.5408	18.4728	61.5408	18.1395
Eliza_20160301_SA54101	38.7578	17.5858	38.3957	18.0168	35.5854	19.0513	35.2578	18.8961	35.0337	18.7065	38.4129	16.2065	37.8612	16.0341	34.8958	16.3272	34.6717	16.5686	34.6027	16.8789	39.7922	17.3272	39.6371	17.6203	39.3957	17.8444	39.1371	18.0513	38.8612	18.241	38.5681	18.3789	38.2578	18.4996	37.9647	18.6203	37.6543	18.741	37.3268	18.8444	37.0164	18.9479	36.7061	19.0513	36.3785	19.103	36.0509	19.1203	35.7234
Eliza_20160823_DSC4855	42.3211	30.0712	41.5711	29.9819	38.9818	28.4462	38.7675	28.0891	38.7497	27.7319	43.1961	28.9462	42.9461	28.2498	40.8747	26.1069	40.4818	25.9641	40.1247	25.9998	43.1604	30.6783	42.8389	30.7676	42.4997	30.7498	42.1604	30.6962	41.8568	30.5712	41.5532	30.4283	41.2675	30.2676	40.9818	30.0712	40.6961	29.8926	40.4104	29.714	40.1247	29.5533	39.839	29.3569	39.5711	29.1605	39.3033	28.9641	39.1247
Eliza_20141016_SA50770	55.5169	19.0251	54.9487	19.0088	52.6436	18.1972	52.4651	17.905	52.3677	17.5316	56.1175	17.9212	55.8253	17.4018	53.7799	15.9408	53.4877	15.957	53.1631	16.0869	56.2636	19.4309	56.0038	19.4958	55.7279	19.5445	55.4519	19.5121	55.176	19.4796	54.9162	19.3984	54.6565	19.301	54.3968	19.2199	54.1371	19.1225	53.8773	19.0413	53.6176	18.9439	53.3741	18.814	53.1306	18.668	52.9033	18.5219	52.7248
Eliza_20171114_SA56678	53.6081	26.4457	53.1362	26.7778	50.322	27.04	50.0074	26.8827	49.7977	26.6205	53.713	25.0824	53.1886	24.7328	50.4269	24.1735	50.1123	24.2958	49.8501	24.5405	54.6743	26.5506	54.4471	26.7603	54.1499	26.8827	53.8528	26.9876	53.5557	27.075	53.241	27.1099	52.9439	27.1798	52.6293	27.2148	52.3146	27.2498	52	27.2672	51.6854	27.2847	51.3708	27.2847	51.0562	27.2847	50.759	27.2323	50.4619
Eliza_20141015_SA50701	38.9095	38.1077	38.5322	37.5732	37.6204	34.9949	37.7147	34.7591	37.9033	34.4447	40.23	37.8404	40.2615	37.1802	40.0885	34.6176	39.8842	34.3504	39.6326	34.1303	39.2082	39.0667	38.9566	38.8938	38.7523	38.6579	38.5322	38.4221	38.3907	38.1549	38.2492	37.8719	38.1234	37.5889	38.0134	37.2902	37.9033	37.0072	37.7933	36.7085	37.7147	36.4098	37.6518	36.1111	37.5889	35.7967	37.5575	35.498	37.5732
Eliza_20160826_SA54987	20.0519	45.2421	19.4117	45.0345	16.9896	43.6677	16.9031	43.339	16.8685	42.9584	21.0034	44.1868	20.7612	43.5639	18.8408	41.4359	18.4948	41.384	18.0103	41.4705	20.8477	45.8303	20.5363	45.865	20.2249	45.8303	19.9135	45.7611	19.6193	45.64	19.3425	45.4843	19.0657	45.3286	18.8062	45.1556	18.5467	44.9826	18.2699	44.8269	17.993	44.6712	17.7335	44.4809	17.474	44.3079	17.2491	44.0829	17.0761
Eliza_20141015_SA50721	32.954	21.8596	32.7973	22.5491	31.0579	24.6803	30.6975	24.8526	30.2118	24.8213	32.0608	20.8724	31.4027	21.0135	29.1149	22.5178	28.8798	22.9879	28.8955	23.4423	33.6748	21.2642	33.7062	21.5776	33.6278	21.8753	33.4868	22.1417	33.3614	22.4238	33.1577	22.6745	32.9853	22.9095	32.7973	23.1603	32.5936	23.3953	32.3899	23.6304	32.1705	23.8497	31.9355	24.0535	31.7004	24.2572	31.4654	24.4452	31.1833
Eliza_20151117_SA53491	42.8614	67.1458	42.2252	67.2913	39.4804	66.855	39.2078	66.6005	39.0624	66.3097	43.2613	65.8553	42.8432	65.3463	40.3529	64.0921	39.8985	64.2375	39.535	64.4738	43.8429	67.4003	43.5703	67.5457	43.2613	67.6184	42.9523	67.6184	42.6432	67.6184	42.3161	67.6003	42.007	67.5821	41.7162	67.5094	41.4072	67.4548	41.0982	67.4185	40.7892	67.364	40.4802	67.2913	40.1712	67.2185	39.8803	67.1277	39.6077
Eliza_20170913_SA56453	52.0325	36.4193	51.4361	36.6473	48.4187	36.2263	48.1731	35.9807	48.0503	35.7526	52.4185	35.0334	51.9975	34.5773	49.173	33.4194	48.8397	33.5071	48.5239	33.6475	53.1027	36.7	52.8044	36.8403	52.4711	36.9105	52.1553	36.9806	51.822	37.0157	51.4887	37.0157	51.1554	37.0157	50.8221	36.9806	50.4888	36.9105	50.1554	36.8578	49.8397	36.8052	49.5063	36.735	49.1906	36.6473	48.8748	36.5245	48.5941
Eliza_20171114_SA56620	50.5537	23.6809	50.3041	24.2515	48.1286	26.2309	47.7006	26.2665	47.2905	26.1774	49.68	22.3792	49.0023	22.4862	46.3989	23.7879	46.1849	24.1624	46.1314	24.6082	51.3918	23.0924	51.3205	23.4134	51.1957	23.6987	50.9995	23.9662	50.839	24.2337	50.6072	24.4655	50.3754	24.6795	50.1258	24.8935	49.8939	25.1075	49.6443	25.3393	49.4125	25.5354	49.145	25.7316	48.8953	25.9277	48.61	26.0882	48.3069
Eliza_20170906_SA56336	41.3923	43.326	40.678	43.2215	38.3436	41.8104	38.2391	41.4968	38.2391	41.131	42.333	42.2459	42.124	41.6536	40.2251	39.685	39.9115	39.6502	39.4934	39.7199	42.124	43.9183	41.8104	43.9183	41.5142	43.8835	41.2181	43.779	40.9219	43.6919	40.6606	43.5351	40.3993	43.3783	40.1206	43.2389	39.8592	43.0821	39.5979	42.9253	39.3366	42.7686	39.0753	42.5943	38.8314	42.4027	38.6049	42.1937	38.4307
Eliza_20170210_SA55813	34.0399	27.4712	33.7186	28.0602	31.8266	30.0951	31.4517	30.0951	31.1483	30.0951	33.1474	26.3645	32.5048	26.418	30.0772	27.9174	29.988	28.2922	30.0058	28.6314	34.754	26.7571	34.754	27.0785	34.629	27.3819	34.504	27.6675	34.3255	27.9352	34.1292	28.203	33.915	28.4172	33.7008	28.6671	33.4688	28.8813	33.2367	29.1134	33.0046	29.3275	32.7726	29.5596	32.5584	29.7917	32.2906	29.9523	31.9872
Eliza_20151117_SA53455	46.3473	34.819	45.7718	34.6931	43.5057	32.9485	43.4158	32.5528	43.4158	32.1932	47.3185	33.8478	47.1747	33.3262	45.4841	30.9882	45.1424	30.8443	44.7826	30.8623	47.1207	35.5743	46.797	35.6103	46.4912	35.5384	46.1855	35.4305	45.8797	35.3225	45.61	35.1247	45.3582	34.9269	45.1064	34.729	44.8726	34.5132	44.6028	34.3154	44.351	34.0996	44.0992	33.9017	43.8654	33.6859	43.6856	33.4161	43.5777
Eliza_20171114_SA56686	33.006	43.2548	32.4544	43.664	29.1805	44.3579	28.7891	44.2512	28.4332	44.0199	32.9526	41.5822	32.2587	41.3331	28.8247	40.9417	28.5044	41.1196	28.2197	41.4755	34.2693	43.1658	34.0202	43.4327	33.7177	43.6462	33.3797	43.8242	33.0416	43.9665	32.6857	44.0555	32.3299	44.1622	31.974	44.269	31.6182	44.3579	31.2445	44.4291	30.8709	44.4647	30.515	44.5181	30.1413	44.5359	29.7677	44.5003	29.4118
Eliza_20160823_SA54911	44.0895	17.4751	43.5361	17.85	40.9301	18.9388	40.5552	18.8853	40.2874	18.6532	43.7146	16.065	43.072	15.9579	40.2874	16.2257	40.1446	16.5648	40.0018	16.9039	45.1069	16.9575	44.9999	17.2788	44.7856	17.5287	44.5358	17.7429	44.2501	17.9393	43.9467	18.082	43.6433	18.2248	43.3398	18.3677	43.0185	18.4926	42.715	18.6176	42.3937	18.7247	42.0725	18.8317	41.7512	18.9388	41.4299	18.9746	41.0907
Eliza_20170210_SA55884	63.9206	15.3916	63.5818	15.7305	61.2276	16.319	60.8887	16.1585	60.746	15.9267	63.8315	14.3037	63.3321	14.1432	60.9779	14.0183	60.746	14.268	60.5855	14.4999	64.8124	15.3203	64.6162	15.5165	64.42	15.677	64.1882	15.8196	63.9385	15.9267	63.6888	15.998	63.4391	16.0693	63.1716	16.1407	62.9219	16.212	62.6544	16.2655	62.3868	16.319	62.1193	16.3725	61.8696	16.4082	61.6021	16.4082	61.3346
Eliza_20170210_SA55814	47.5104	38.2909	47.0576	38.6894	44.087	39.3414	43.761	39.1422	43.5255	38.9248	47.3293	36.7694	46.7134	36.5158	43.761	36.4252	43.435	36.5883	43.1633	36.8237	48.5428	38.1822	48.3617	38.4539	48.09	38.6894	47.8183	38.8705	47.5104	38.9973	47.1844	39.106	46.8583	39.1965	46.5504	39.2871	46.2063	39.3595	45.8802	39.432	45.5542	39.4863	45.21	39.5226	44.884	39.5588	44.5399	39.5226	44.2319
Eliza_20160823_SA54874	31.3768	53.0799	30.7835	53.2417	28.374	52.7922	28.2122	52.5225	28.1403	52.3247	31.7365	51.9471	31.3049	51.4796	28.8955	50.6705	28.6078	50.7244	28.4639	50.8682	32.222	53.2777	31.9882	53.4395	31.7185	53.5115	31.4488	53.5474	31.1791	53.5654	30.8914	53.5474	30.6216	53.5294	30.3339	53.4935	30.0642	53.4755	29.7765	53.4575	29.5068	53.4036	29.2371	53.3137	28.9854	53.2238	28.7336	53.0979	28.4999
Eliza_20141015_SA50690	27.177	36.8629	27.318	36.0949	28.995	33.2111	29.4966	32.9917	29.7787	33.1641	28.5405	37.9914	29.1831	37.5368	31.7692	35.3426	31.8632	34.9038	31.7692	34.5433	26.362	37.9287	26.315	37.5525	26.3463	37.1607	26.3933	36.7845	26.5187	36.4084	26.6911	36.0636	26.8792	35.7344	27.0829	35.4053	27.2553	35.0605	27.4591	34.7314	27.6785	34.4179	27.9293	34.1201	28.1957	33.838	28.4622	33.5559	28.7913
Eliza_20151119_SA53667	59.6619	5.03712	59.2515	5.52218	56.9008	6.45498	56.6023	6.38035	56.4344	6.2311	59.3074	3.86179	58.6545	3.69389	56.1546	4.21626	55.9493	4.42147	55.8747	4.62669	60.5387	4.70131	60.4641	4.98115	60.2962	5.22368	60.091	5.4289	59.8484	5.5968	59.5873	5.70874	59.3261	5.83933	59.0462	5.95126	58.7851	6.08186	58.5239	6.19379	58.244	6.30573	57.9828	6.39901	57.6844	6.45498	57.4045	6.47363	57.106
Eliza_20170913_SA56481	35.5348	65.1993	35.0296	65.5129	32.7651	65.6522	32.4864	65.4606	32.3819	65.2516	35.6044	64.0322	35.0819	63.6316	32.8522	63.3355	32.5561	63.4574	32.4168	63.6316	36.3883	65.1471	36.2141	65.3387	35.9877	65.4606	35.7438	65.5651	35.4999	65.6348	35.2386	65.6696	34.9774	65.687	34.7161	65.7219	34.4548	65.7567	34.1935	65.7916	33.9322	65.809	33.6709	65.8264	33.4096	65.8264	33.1484	65.7916	32.9045
Eliza_20171114_SA56773	31.1879	21.4329	30.7858	22.0098	28.3908	23.7406	27.9537	23.7406	27.4817	23.6182	30.5935	20.1218	29.8593	20.1043	27.0447	20.8211	26.73	21.2231	26.5202	21.6252	32.2193	20.8036	32.2018	21.1532	32.0445	21.4504	31.8347	21.7301	31.59	21.9749	31.3103	22.1847	31.0306	22.3944	30.7334	22.5867	30.4536	22.779	30.1564	22.9888	29.8767	23.1811	29.5795	23.356	29.2649	23.5308	28.9502	23.6531	28.6006
Eliza_20160524_SA54449	55.34	33.6019	54.8024	33.566	52.4548	32.0965	52.2935	31.7919	52.2935	31.4872	56.1465	32.6162	55.9314	32.1324	54.0497	30.1073	53.7272	30.0894	53.4583	30.0894	56.1644	34.265	55.8598	34.3008	55.5551	34.247	55.2684	34.1753	54.9816	34.0678	54.7128	33.9245	54.444	33.7811	54.1752	33.6377	53.9064	33.4764	53.6555	33.3151	53.4046	33.1359	53.1537	32.9746	52.9207	32.7596	52.7236	32.5266	52.5802
Eliza_20171120_SA57055	43.3573	23.4984	42.8272	23.4808	40.283	22.7917	40.018	22.4914	39.912	22.1557	43.9226	22.297	43.5516	21.873	41.3961	20.3535	40.9721	20.3535	40.6187	20.4949	44.276	23.9048	43.9933	23.9755	43.693	23.9931	43.4103	23.9755	43.1099	23.9578	42.8449	23.8695	42.5622	23.7811	42.2795	23.7281	41.9968	23.6398	41.7141	23.5514	41.4315	23.4454	41.1664	23.3571	40.8838	23.2511	40.6187	23.1274	40.4067
Eliza_20141016_SA50789	40.5469	17.8438	40.1719	18.5938	37.3594	20.2656	36.9375	20.2031	36.5	19.9531	39.8438	16.4688	38.9844	16.4531	35.8438	17.375	35.6719	17.625	35.5312	17.9688	41.5156	17.3594	41.4531	17.7188	41.2812	18.0469	41.0781	18.375	40.8281	18.6562	40.5625	18.9062	40.25	19.1094	39.9375	19.2969	39.6406	19.5469	39.3438	19.75	39.0156	19.9375	38.6719	20.0625	38.3125	20.1719	37.9531	20.25	37.5781
Eliza_20171114_SA56636	62.2129	5.49692	61.7642	5.91359	59.3283	6.65079	59.0558	6.57066	58.7513	6.37835	61.9886	4.35907	61.4116	4.23086	58.8154	4.3751	58.5911	4.58344	58.4148	4.82383	63.0303	5.32063	62.854	5.545	62.6456	5.72128	62.4213	5.91359	62.1969	6.07385	61.9405	6.20206	61.668	6.25014	61.3956	6.3463	61.1232	6.42643	60.8507	6.50656	60.5783	6.58669	60.3058	6.65079	60.0334	6.73092	59.7449	6.76297	59.4725
UpperBarton_20140317_SA17020	34.6187	21.4633	34.0163	21.7435	31.2843	21.4213	31.0181	21.1271	30.808	20.8048	34.969	20.1604	34.5206	19.586	31.8727	18.6333	31.5645	18.7174	31.1722	18.9135	35.5434	21.5474	35.2912	21.7295	34.997	21.7996	34.7168	21.8836	34.4086	21.9397	34.1144	21.9397	33.8061	21.9257	33.5119	21.8976	33.2037	21.8556	32.8955	21.8416	32.6013	21.8136	32.2931	21.7856	31.9988	21.7575	31.7046	21.6735	31.4524
Eliza_20141014_SA50473	52.9281	12.8817	52.9121	13.5345	51.4472	16.4485	51.081	16.6555	50.6511	16.7191	51.6383	12.0378	50.9536	12.3881	48.7403	14.7129	48.5492	15.095	48.6288	15.4612	53.4854	12.1174	53.5809	12.4518	53.5809	12.8021	53.5331	13.1365	53.4694	13.4868	53.3421	13.8052	53.1828	14.1237	53.0395	14.4422	52.8962	14.7447	52.7688	15.0632	52.5618	15.3498	52.3548	15.6364	52.1319	15.8912	51.8771	16.13	51.6064
Eliza_20141014_SA50536	37.0979	15.9787	37.4002	15.4216	39.5965	13.9097	40.0103	13.8938	40.4082	14.0211	37.639	17.1882	38.3074	17.1405	40.8061	16.472	41.0607	16.1219	41.2517	15.8036	36.3021	16.281	36.3976	16.0105	36.5568	15.7718	36.7477	15.5649	36.9546	15.358	37.1934	15.1988	37.4002	15.0078	37.6231	14.8169	37.8459	14.6418	38.0846	14.4826	38.3392	14.3394	38.578	14.1962	38.8485	14.0689	39.1032	13.9575	39.3896
Eliza_20160823_SA54870	37.3394	31.8076	36.8252	31.9849	34.3607	31.4707	34.2012	31.2048	34.1302	31.0098	37.7472	30.6197	37.4103	30.1765	35.1231	29.2545	34.7153	29.29	34.5203	29.5205	38.2436	32.0913	37.9777	32.1622	37.7117	32.1977	37.4458	32.2331	37.1621	32.2331	36.8961	32.2154	36.6125	32.1977	36.3465	32.1622	36.0806	32.109	35.8146	32.0381	35.5487	32.0027	35.2827	31.914	35.0168	31.8431	34.7685	31.719	34.5558
Parthenia_20161117_SA55547	46.3613	26.0439	46.184	26.4694	44.8544	28.8274	44.4821	28.9869	44.1275	29.0224	45.3153	25.1397	44.8721	25.4234	42.7978	27.0367	42.6914	27.4622	42.7092	27.8523	46.9464	25.0865	47.0173	25.3879	46.9996	25.707	46.9109	25.9907	46.8223	26.2921	46.6805	26.5758	46.5032	26.824	46.3259	27.0899	46.1486	27.3558	46.0245	27.6218	45.8295	27.87	45.6522	28.1359	45.4572	28.3841	45.2267	28.5791	44.9607
Parthenia_20161117_SA55552	69.4041	44.9985	68.9185	45.2503	66.0949	45.4661	65.7352	45.2323	65.5194	44.9265	69.53	43.6856	69.0444	43.3618	66.2927	42.6424	65.951	42.7324	65.6992	43.0021	70.4113	45.0704	70.1955	45.3042	69.9257	45.4481	69.6379	45.574	69.3322	45.6639	69.0264	45.6999	68.7207	45.6999	68.397	45.7179	68.0912	45.7359	67.7675	45.7359	67.4617	45.7179	67.138	45.7179	66.8323	45.7179	66.5265	45.6819	66.2388
Parthenia_20170817_SA56251	50.6064	45.3843	49.9536	45.4873	46.9647	44.2849	46.7757	43.9757	46.5867	43.6493	51.3966	44.0616	51.1046	43.5119	48.5622	41.6738	48.2015	41.6395	47.8579	41.6395	51.5855	45.8309	51.2592	45.9168	50.9156	45.934	50.572	45.8996	50.2456	45.8309	49.9193	45.745	49.5929	45.6591	49.2665	45.5732	48.9401	45.4358	48.6309	45.3327	48.3045	45.2125	47.9953	45.0751	47.6861	44.9376	47.3941	44.7659	47.188
Eliza_20171120_SA57032	38.7733	50.9	38.0996	50.7404	35.7062	49.2866	35.6353	48.9675	35.5998	48.6838	39.6243	49.7298	39.3761	49.1271	37.3373	47.1591	36.965	47.0882	36.6636	47.1414	39.5534	51.5382	39.2343	51.5559	38.9152	51.5382	38.596	51.4496	38.2946	51.3432	38.011	51.2191	37.7273	51.0595	37.4436	50.9	37.16	50.7581	36.894	50.5808	36.6458	50.3858	36.3976	50.1908	36.1494	49.9603	35.9367	49.7298	35.7594
[truncated: 46 more columns]

## Sheet: Metadata
Column Title	Explanation + Notes
X1	Photo ID
X2-X41.1	Landmark Coordinates
SVL	Snout Vent Length measurement (mm)
TL	Trunk Length measurement (mm)
Taxon	Initial Expert ID taxon- (NFB_ID_ABS = expert ID wildcaught E. waterlooensis)
Season	Capture Season- (Captive E. waterlooensis just say waterlooensis)
Locality	Capture Locality- (Captive E. waterlooensis just say waterlooensis)
PC1	Principal Component Axis 1
PC2	Principal Component Axis 2
PC3	Principal Component Axis 3
PC4	Principal Component Axis 4
PC5	Principal Component Axis 5
PC6	Principal Component Axis 6
logCS	Log Centroid Size
logTL	Log Trunk Length
mClust_group	mClust Group assignment
